# Supplementary material for: Phosphine-catalyzed intramolecular Rauhut–Currier reaction: enantioselective synthesis of hydro-2H-indole derivatives
Source: Royal Society of Chemistry journal article supplement (doi:10.1039/c7ob01820g), 2017-01-01
Supplement: c7ob01820g1.pdf [file c7ob01820g1.pdf]

# Supporting Information

## **Phosphine-Catalyzed Intramolecular Rauhut-Currier Reaction:**

### **Enantioselective Synthesis of Hydro-2H-Indole Derivatives**

Hongxing Jin,<sup>a</sup> Qinglong Zhang,<sup>a</sup> Erqing Li,<sup>a</sup> Penghao Jia,<sup>a</sup> Ning Li<sup>a</sup> and

You Huang\*<sup>ab</sup> □

- a. State Key Laboratory and Institute of Elemento-Organic Chemistry, College of Chemistry, Nankai University, Tianjin 30071, China
- b. Collaborative Innovation Center of Chemical Science and Engineering (Tianjin), Tianjin 30071, China

E-mail: [hyou@nankai.edu.cn](mailto:hyou@nankai.edu.cn)

|                                                                         |      |
|-------------------------------------------------------------------------|------|
| I. General Information .....                                            | S2   |
| II. Preparation of the N-tosylacrylamide .....                          | S2   |
| III. Preparation of the Catalysts .....                                 | S4   |
| IV. References .....                                                    | S5   |
| V. General Procedure and Spectroscopic Data and HPLC Chromatogram ..... | S5   |
| VI. X-ray crystal structure .....                                       | S106 |

## I. General Information

All the starting materials were obtained from commercial sources and used without further purification unless otherwise stated. Yields referred to isolated compounds through flash column chromatography performed using 300-400 mesh silica gel. NMR spectra were recorded on Varian Bruker ARX 400 spectrometer in CDCl<sub>3</sub> solution and the chemical shifts were reported in parts per million (ppm) relative to internal standard TMS (0 ppm) for <sup>1</sup>H NMR and chloroform-*d* (77.0 ppm) for <sup>13</sup>C NMR. Coupling constants were given in Hertz (Hz). Multiplicity was indicated as follows: s (singlet), d (doublet), t (triplet), q (quartet), dd (doublet of doublet), brs (broad singlet) and m (multiplet). Enantiomeric excesses of the RC products were determined by Agilent 6890 chiral-phase high performance liquid chromatography (HPLC) or LabAlliance PC2001, using chiralcel AD-H, OD-H, and IC. Optical rotations were performed on Perkin-Elmer-341 MC digital polarimeter. Infrared spectra (IR) spectra were recorded on a Perkin-Elmer 983G instrument. High resolution mass spectrometry (HRMS) were obtained on an IonSpec FT-ICR mass spectrometer with ESI or MALDI resource. Melting points were measured on a RY-I apparatus and are reported uncorrected.

## II. Preparation of the N-tosylacrylamide \*

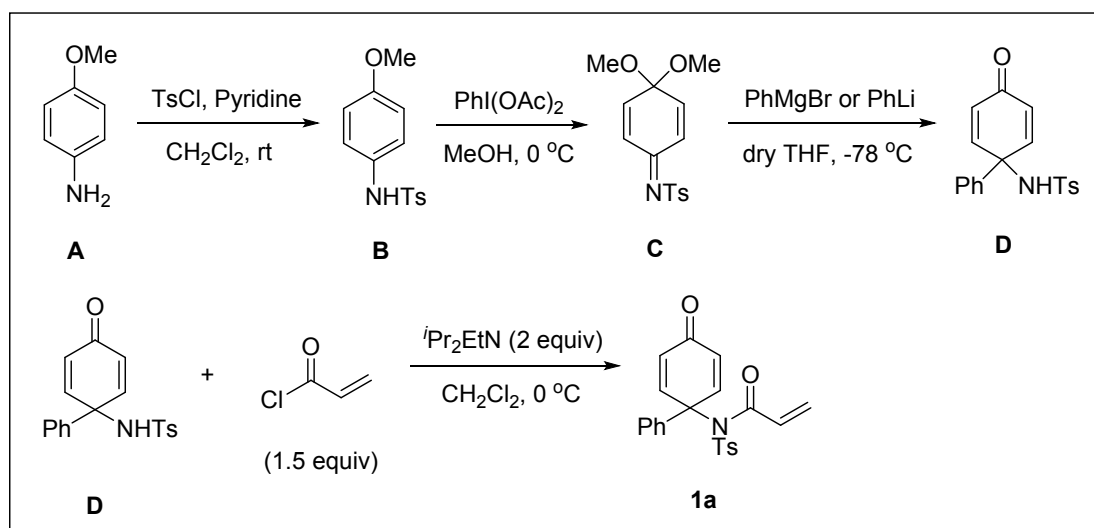

\* Unless otherwise specified, all starting materials N-tosylacrylamide (**1a** to **1v**) were prepared as above process.

**The Synthesis of B:** A round bottom flask was charged with a methylene chloride solution of *p*-anisidine **A** (100 mmol, 12.3 g), followed by the addition of pyridine (200 mmol, 16.1 mL). Tosyl chloride (105 mmol, 20 g) was added in many ports. The reaction mixture was allowed to stir at room temperature until completion of the reaction monitored by TLC. The reaction was then quenched with dilute hydrochloric acid solution, extracted with methylene chloride, washed with sodium bicarbonate solution, and dried over anhydrous magnesium sulfate. The solvent was removed in vacuo and the crude product **B** was obtained without further purification and used for next synthesis step.

**The Synthesis of C:** To a stirred solution of sulfonamide **B** (50 mmol, 13.9 g) in anhydrous methanol (80 mL) at 0 °C (ice bath) was added (Diacetoxyiodo)benzene<sup>[1]</sup> (50 mmol, 16.1 g) slowly. And the reaction mixture was stirred at same temperature for another 1 h after the addition of (Diacetoxyiodo)benzene. Then the precipitates were filtered from reaction mixture, collected and dried and were used directly in the next step.

**The Synthesis of D:** To a flame dried round bottom flask with a magnetic stirring bar under Argon atmosphere were added bromobenzene (12 mmol, 1.26 mL) and anhydrous tetrahydrofuran (15 mL). The resulting mixture was cooled to -78 °C for 20 min, and *n*-butyllithium solution (3.52 mL) (2.5 mol/L in hexane) was added in one port under Argon atmosphere. The reaction mixture was kept at -78 °C for another 2 h. And then a solution of sulfonyl imides **C** (8 mmol, 2.46 g) in anhydrous tetrahydrofuran was added, and the reaction mixture was still kept at -78 °C for 10 h. The reaction was then quenched at -78 °C with hydrochloric acid solution, and another 3 h were needed for the reaction at room temperature. After that the mixture was extracted with ethyl acetate (2 × 100 mL). The combined organic extracts were washed by water (2 × 100 mL) and dried over anhydrous magnesium sulfate and concentrated in vacuo. The residue was recrystallized with ethyl acetate and *n*-hexane.

**The Synthesis of 1a:** A round bottom flask was charged with a methylene chloride solution of amine **D** (3 mmol, 1.017 g), which were easily accessible from the corresponding *p*-anisidine, followed by the addition of ethyldiisopropylamine (6

mmol, 990  $\mu$ L). And the reaction mixture was cooled to 0  $^{\circ}$ C (ice bath) for 10 min. Acrolyl chloride (4.5 mmol, 365  $\mu$ L) in methlene chloride (5 mL) was added drop wise slowly. The reaction mixture was allowed to stir for another 10 minutes at same temperature after the addition of acrolyl chloride. The solvent was removed in vacuo and the crude product was directly purified by silica gel flash column chromatography using petroleum ether/ethyl acetate as an elutant to give the desired product **1a** as a white or pale solid and recovered **D**.

### III. Preparation of the Catalysts

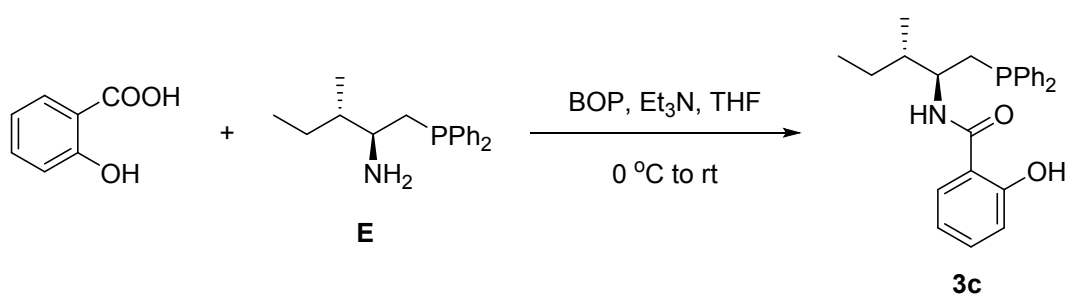

To a stirred solution of salicylic acid (0.6 mmol, 83 mg), triethylamine (3 mmol, 416  $\mu$ L), BOP (0.625 mmol, 277 mg) in anhydrous tetrahydrofuran (3 mL) at 0  $^{\circ}$ C under Ar, a solution of aminophosphine **E**<sup>[2,3]</sup>(0.5 mmol, 143 mg) in anhydrous tetrahydrofuran (3 mL) was added. After 1 h at 0  $^{\circ}$ C, the solution was then stirred at room temperature for 10 h until completion of the reaction monitored by TLC. Then saturated sodium bicarbonate solution (10 mL) was added to quench the reaction. The reaction mixture was extracted with ethyl acetate, the combined organic layers were dried over sodium sulfate and concentrated under reduced pressure. The residue was purified by silica gel chromatography using petroleum ether/ ethyl acetate as the eluent to afford the catalyst **3c**.

#### N-((2S,3S)-1-(diphenylphosphino)-3-methylpentan-2-yl)-2-hydroxybenzamide

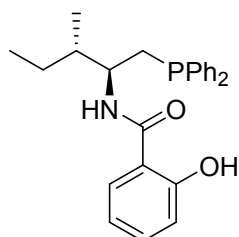

$[\alpha]_D^{29} = +8.8$  ( $c = 1.0$ ,  $\text{CH}_2\text{Cl}_2$ );  $^1\text{H NMR}$  (400 MHz,  $\text{CDCl}_3$ )  $\delta$  12.32 (s, 1H), 7.37 (dt,

$J = 36.5, 12.5$  Hz, 11H), 6.94 (d,  $J = 8.2$  Hz, 1H), 6.78 (d,  $J = 7.4$  Hz, 1H), 6.69 (t,  $J = 7.4$  Hz, 1H), 6.00 (d,  $J = 7.7$  Hz, 1H), 4.28 (s, 1H), 2.41 (d,  $J = 12.0$  Hz, 1H), 2.37 – 2.29 (m, 1H), 1.84 (m, 1H), 1.48 (d,  $J = 6.2$  Hz, 1H), 1.15 (dt,  $J = 21.6, 7.6$  Hz, 1H), 0.94 (d,  $J = 6.5$  Hz, 3H), 0.88 (t,  $J = 7.1$  Hz, 3H);  $^{13}\text{C}$  NMR (101 MHz,  $\text{CDCl}_3$ )  $\delta$  169.14 (s), 161.52 (s), 138.12 (dd,  $J = 31.7, 12.7$  Hz), 138.12 (dd,  $J = 31.7, 12.7$  Hz), 133.98 (s), 132.82 (t,  $J = 18.8$  Hz), 129.25 – 128.49 (m), 125.13 (s), 118.40 (d,  $J = 6.4$  Hz), 114.25 (s), 51.80 (d,  $J = 13.5$  Hz), 39.12 (d,  $J = 7.7$  Hz), 30.33 (d,  $J = 14.7$  Hz), 25.48 (s), 14.90 (s), 11.63 (s);  $^{31}\text{P}$  NMR (162 MHz,  $\text{CDCl}_3$ )  $\delta$  -23.40 (s); HRMS (ESI)  $m/z$  calcd for  $\text{C}_{25}\text{H}_{28}\text{NO}_2\text{P}$   $[\text{M}+\text{H}]^+ = 406.1930$ , found = 406.1937.

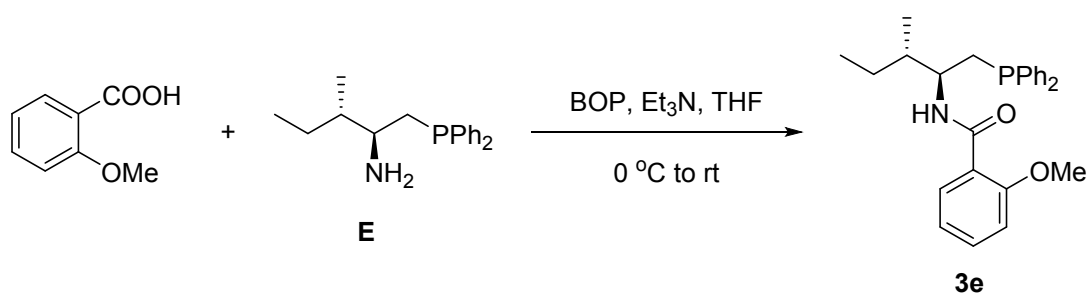

Catalyst **3e** was prepared from 2-methoxybenzoic acid following the procedure described for the preparation of **3c**.

## IV. References

- [1] S. C. Banfield, M. A. Kerr, *Can. J. Chem.* **2004**, *82*, 131-138.
- [2] K. Kawamura, H. Fukuzawa, M. Hayashi, *Org. Lett.* **2008**, *10*, 3509-3512.
- [3] X. Dong, L. Liang, E. Li, Y. Huang, *Angew. Chem. Int. Ed.* **2015**, *54*, 1621-1624.

## V. General Procedure and Spectroscopic Data and HPLC Chromatogram

To a stirred solution of **1** (0.1 mmol) in toluene (1.0 mL) at 0 °C, chiral aminophosphine catalyst **3c** (0.02 mmol) was added in one portion. Then the reaction mixture was stirred at this temperature. After completion of the reaction (monitored by TLC), the reaction mixture was directly applied to a silica gel dropper column plug (petroleum ether/ethyl acetate as eluent) to give desired product **2**.

### N-(4-oxo-[1,1'-biphenyl]-1(4H)-yl)-N-tosylacrylamide

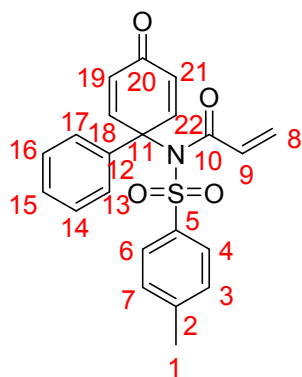

(**1a**) 70% yield; white solid; mp 121-124°C;  $^1\text{H}$  NMR (400 MHz,  $\text{CDCl}_3$ )  $\delta$  7.63 (d,  $J$  = 8.3 Hz, 2H), 7.32 (s, 1H), 7.27 (ddd,  $J$  = 12.8, 6.3, 3.9 Hz, 8H), 6.94 (dd,  $J$  = 16.8, 10.2 Hz, 1H), 6.22 (d,  $J$  = 16.8 Hz, 1H), 6.04 (d,  $J$  = 10.2 Hz, 2H), 5.78 (d,  $J$  = 10.2 Hz, 1H), 2.44 (s, 3H);  $^{13}\text{C}$  NMR (101 MHz,  $\text{CDCl}_3$ )  $\delta$  184.76 (C=O, C20), 169.49 (C=O, C10), 148.01 (CH, C18, C22), 145.73 (C, Ar), 138.68 (C, Ar), 136.46 (C, Ar), 133.32 (CH, C9), 130.93 ( $\text{CH}_2$ , C8), 129.86 (CH, C19, C21), 129.42 (CH, Ar), 128.62 (CH, Ar), 128.56 (CH, Ar), 127.73 (CH, Ar), 125.09 (CH, Ar), 65.66 (C11), 21.77 ( $\text{CH}_3$ , C1); IR (neat):  $\nu$  2989, 2377, 2349, 2320, 1700, 1626, 1398, 1177, 984, 763  $\text{cm}^{-1}$ ; HRMS (ESI)  $m/z$  calcd for  $\text{C}_{22}\text{H}_{19}\text{NO}_4\text{S}$  [ $\text{M}+\text{H}$ ] $^+$  = 394.1113, found = 394.1113.

### N-(4'-fluoro-4-oxo-[1,1'-biphenyl]-1(4H)-yl)-N-tosylacrylamide

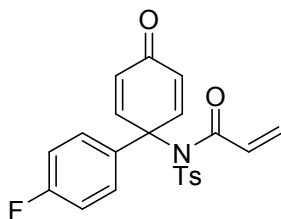

(**1b**) 78% yield; white solid; mp 108-110°C;  $^1\text{H}$  NMR (400 MHz,  $\text{CDCl}_3$ )  $\delta$  7.62 (d,  $J$  = 8.3 Hz, 2H), 7.28 (dd,  $J$  = 12.1, 5.1 Hz, 6H), 6.94 (dt,  $J$  = 16.9, 9.5 Hz, 3H), 6.23 (d,  $J$  = 16.8 Hz, 1H), 6.04 (d,  $J$  = 10.2 Hz, 2H), 5.80 (d,  $J$  = 10.6 Hz, 1H), 2.44 (s, 3H);  $^{13}\text{C}$  NMR (101 MHz,  $\text{CDCl}_3$ )  $\delta$  184.48, 169.45, 163.63, 161.16, 147.69, 145.82, 136.29, 134.51 (d,  $J$  = 3.4 Hz), 133.19, 131.16, 129.86, 128.50, 127.72, 126.91 (d,  $J$  = 8.3 Hz), 116.39 (d,  $J$  = 21.9 Hz), 65.02, 21.74; IR (neat):  $\nu$  2989, 2377, 2350, 2314, 1671, 1504, 1275, 1261, 763, 750  $\text{cm}^{-1}$ ; HRMS (ESI)  $m/z$  calcd for  $\text{C}_{22}\text{H}_{18}\text{FNO}_4\text{S}$

$[M+H]^+ = 412.1019$ , found = 412.1044.

**N-(4'-chloro-4-oxo-[1,1'-biphenyl]-1(4H)-yl)-N-tosylacrylamide**

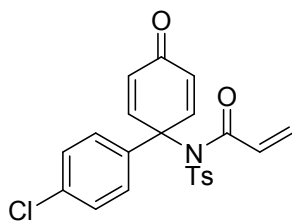

**(1c)** 88% yield; white solid; mp 122-124°C;  $^1\text{H}$  NMR (400 MHz,  $\text{CDCl}_3$ )  $\delta$  7.62 (d,  $J = 8.4$  Hz, 2H), 7.31 – 7.22 (m, 8H), 6.95 (dd,  $J = 16.8, 10.2$  Hz, 1H), 6.24 (dd,  $J = 16.8, 1.0$  Hz, 1H), 6.05 (d,  $J = 10.3$  Hz, 2H), 5.81 (dd,  $J = 10.2, 1.0$  Hz, 1H), 2.44 (s, 3H);  $^{13}\text{C}$  NMR (101 MHz,  $\text{CDCl}_3$ )  $\delta$  184.43, 169.35, 147.44, 145.88, 137.36, 136.26, 134.52, 133.07, 131.28, 129.88, 129.58, 128.49, 127.91, 126.37, 65.11, 21.74; IR (neat):  $\nu$  2989, 2377, 2350, 2320, 1698, 1671, 1398, 1359, 1275, 1261, 1192, 1087, 987, 763, 750  $\text{cm}^{-1}$ ; HRMS (ESI)  $m/z$  calcd for  $\text{C}_{22}\text{H}_{18}\text{ClNO}_4\text{S}$   $[M+H]^+ = 428.0723$ , found = 428.0728.

**N-(3'-chloro-4-oxo-[1,1'-biphenyl]-1(4H)-yl)-N-tosylacrylamide**

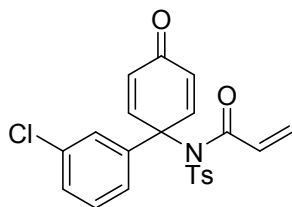

**(1d)** 52% yield; white solid; mp 158-160°C;  $^1\text{H}$  NMR (400 MHz,  $\text{CDCl}_3$ )  $\delta$  7.54 (d,  $J = 7.9$  Hz, 2H), 7.19 (dd,  $J = 20.6, 9.7$  Hz, 8H), 6.89 (dd,  $J = 16.7, 10.2$  Hz, 1H), 6.17 (d,  $J = 16.8$  Hz, 1H), 6.00 (d,  $J = 9.9$  Hz, 2H), 5.76 (d,  $J = 10.2$  Hz, 1H), 2.38 (s, 3H);  $^{13}\text{C}$  NMR (101 MHz,  $\text{CDCl}_3$ )  $\delta$  184.45, 169.33, 147.26, 145.91, 140.76, 136.24, 135.32, 133.03, 131.32, 130.57, 129.90, 128.80, 128.48, 128.10, 125.32, 123.15, 65.14, 21.76; IR (neat):  $\nu$  2989, 2377, 2350, 2319, 1699, 1671, 1398, 1361, 1275, 1261, 1086, 991, 763, 750  $\text{cm}^{-1}$ ; HRMS (ESI)  $m/z$  calcd for  $\text{C}_{22}\text{H}_{18}\text{ClNO}_4\text{S}$   $[M+H]^+ = 428.0723$ , found = 428.0728.

**N-(4'-bromo-4-oxo-[1,1'-biphenyl]-1(4H)-yl)-N-tosylacrylamide**

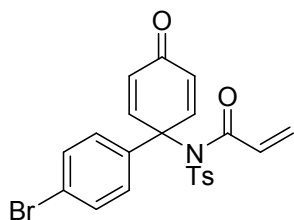

(**1e**) 75% yield; white solid; mp 123-126°C;  $^1\text{H}$  NMR (400 MHz,  $\text{CDCl}_3$ )  $\delta$  7.64 (d,  $J$  = 8.3 Hz, 2H), 7.43 (d,  $J$  = 8.7 Hz, 2H), 7.29 (t,  $J$  = 10.0 Hz, 4H), 7.19 (d,  $J$  = 8.7 Hz, 2H), 6.98 (dd,  $J$  = 16.8, 10.2 Hz, 1H), 6.27 (d,  $J$  = 16.8 Hz, 1H), 6.08 (d,  $J$  = 10.2 Hz, 2H), 5.84 (d,  $J$  = 10.3 Hz, 1H), 2.47 (s, 3H);  $^{13}\text{C}$  NMR (101 MHz,  $\text{CDCl}_3$ )  $\delta$  184.42, 169.33, 147.38, 145.89, 137.93, 136.25, 133.04, 132.52, 131.32, 129.89, 128.48, 127.94, 126.64, 122.66, 65.18, 21.75; IR (neat):  $\nu$  2989, 2377, 2350, 2319, 1699, 1670, 1397, 1360, 1275, 1261, 1085, 986, 763, 750  $\text{cm}^{-1}$ ; HRMS (ESI)  $m/z$  calcd for  $\text{C}_{22}\text{H}_{18}\text{BrNO}_4\text{S}$   $[\text{M}+\text{H}]^+$  = 472.0218, found = 472.0218.

**N-(4-oxo-4'-(trifluoromethyl)-[1,1'-biphenyl]-1(4H)-yl)-N-tosylacrylamide**

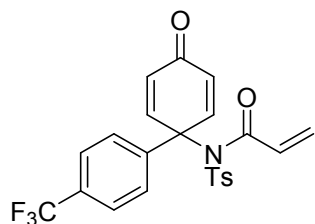

(**1f**) 79% yield; white solid; mp 140-142°C;  $^1\text{H}$  NMR (400 MHz,  $\text{CDCl}_3$ )  $\delta$  7.56 (d,  $J$  = 8.3 Hz, 2H), 7.47 (d,  $J$  = 8.4 Hz, 2H), 7.34 (d,  $J$  = 8.4 Hz, 2H), 7.20 (dd,  $J$  = 13.6, 6.9 Hz, 4H), 6.93 (dd,  $J$  = 16.8, 10.2 Hz, 1H), 6.17 (d,  $J$  = 16.8 Hz, 1H), 6.02 (d,  $J$  = 10.2 Hz, 2H), 5.76 (d,  $J$  = 10.3 Hz, 1H), 2.38 (s, 3H);  $^{13}\text{C}$  NMR (101 MHz,  $\text{CDCl}_3$ )  $\delta$  184.29, 169.20, 147.06, 145.99, 142.97, 136.24, 132.79, 131.49, 130.44, 129.94, 128.45, 128.27, 126.40 (d,  $J$  = 3.7 Hz), 126.35, 125.27, 65.34, 21.73; IR (neat):  $\nu$  2989, 2377, 2350, 2319, 1699, 1672, 1398, 1325, 1275, 1261, 1086, 988, 763, 750  $\text{cm}^{-1}$ ; HRMS (ESI)  $m/z$  calcd for  $\text{C}_{23}\text{H}_{18}\text{F}_3\text{NO}_4\text{S}$   $[\text{M}+\text{H}]^+$  = 462.0987, found = 462.0977.

**N-(4-oxo-3',5'-bis(trifluoromethyl)-[1,1'-biphenyl]-1(4H)-yl)-N-tosylacrylamide**



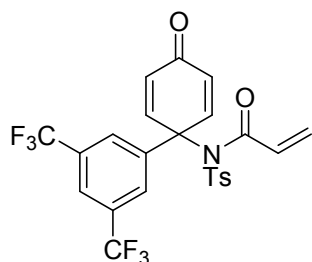

(**1g**) 85% yield; white solid; mp 169-172°C; <sup>1</sup>H NMR (400 MHz, CDCl<sub>3</sub>) δ 7.77 (s, 1H), 7.71 (s, 2H), 7.62 (d, *J* = 8.3 Hz, 2H), 7.31 (d, *J* = 8.1 Hz, 2H), 7.29 – 7.22 (m, 2H), 7.01 (dd, *J* = 16.8, 10.3 Hz, 1H), 6.24 (d, *J* = 16.8 Hz, 1H), 6.15 (d, *J* = 10.2 Hz, 2H), 5.86 (d, *J* = 10.3 Hz, 1H), 2.46 (s, 3H); <sup>13</sup>C NMR (101 MHz, CDCl<sub>3</sub>) δ 183.87, 169.34, 146.21 (d, *J* = 17.0 Hz), 142.18, 136.00, 132.91, 132.55 (d, *J* = 3.8 Hz), 132.05, 130.05, 128.93, 128.41, 125.02 (d, *J* = 3.2 Hz), 124.11, 122.46, 121.40, 64.86, 21.76; IR (neat): ν 2989, 2377, 2349, 2314, 1697, 1673, 1364, 1277, 1261, 1178, 1136, 918, 763, 750 cm<sup>-1</sup>; HRMS (ESI) *m/z* calcd for C<sub>24</sub>H<sub>17</sub>F<sub>6</sub>NO<sub>4</sub>S [M+H]<sup>+</sup> = 530.0861, found = 530.0873.

#### N-tosyl-N-(3',4',5'-trifluoro-4-oxo-[1,1'-biphenyl]-1(4H)-yl)acrylamide

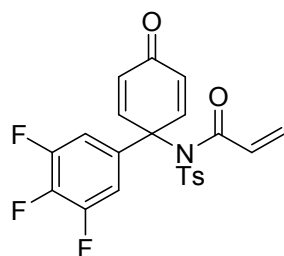

(**1h**) 37% yield; white solid; mp 139-141°C; <sup>1</sup>H NMR (400 MHz, CDCl<sub>3</sub>) δ 7.67 (d, *J* = 8.3 Hz, 2H), 7.33 (t, *J* = 8.6 Hz, 4H), 7.03 – 6.85 (m, 3H), 6.28 (d, *J* = 16.8 Hz, 1H), 6.21 (d, *J* = 10.2 Hz, 2H), 5.82 (d, *J* = 10.3 Hz, 1H), 2.47 (s, 3H); <sup>13</sup>C NMR (101 MHz, CDCl<sub>3</sub>) δ 184.06, 168.30, 145.80, 145.23, 136.53, 131.91, 131.12, 129.89, 129.09, 128.28, 123.42, 120.98, 112.79 (d, *J* = 3.4 Hz), 112.62 (d, *J* = 3.0 Hz), 63.45, 21.73; IR (neat): ν 2989, 2377, 2349, 2319, 1693, 1673, 1510, 1473, 1275, 1261, 1089, 926, 763, 750 cm<sup>-1</sup>; HRMS (ESI) *m/z* calcd for C<sub>24</sub>H<sub>17</sub>F<sub>6</sub>NO<sub>4</sub>S [M+H]<sup>+</sup> = 530.0861, found = 530.0873.

#### N-(3'-methyl-4-oxo-[1,1'-biphenyl]-1(4H)-yl)-N-tosylacrylamide

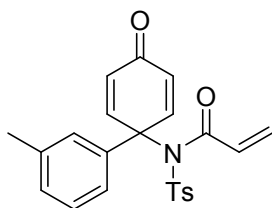

**(1i)** 88% yield; white solid; mp 139-140°C;  $^1\text{H}$  NMR (400 MHz,  $\text{CDCl}_3$ )  $\delta$  7.62 (d,  $J = 8.3$  Hz, 2H), 7.31 (s, 1H), 7.29 (d,  $J = 2.1$  Hz, 2H), 7.26 (s, 1H), 7.16 (t,  $J = 7.7$  Hz, 1H), 7.09 (d,  $J = 8.2$  Hz, 1H), 7.05 (d,  $J = 7.1$  Hz, 2H), 6.93 (dd,  $J = 16.8, 10.2$  Hz, 1H), 6.22 (d,  $J = 16.8$  Hz, 1H), 6.03 (d,  $J = 10.2$  Hz, 2H), 5.79 (d,  $J = 10.4$  Hz, 1H), 2.44 (s, 3H), 2.26 (s, 3H);  $^{13}\text{C}$  NMR (101 MHz,  $\text{CDCl}_3$ )  $\delta$  184.82, 169.53, 148.11, 145.65, 139.24, 138.41, 136.45, 133.38, 130.80, 129.78, 129.44, 129.23, 128.54, 127.59, 125.72, 122.22, 65.62, 21.73, 21.58; IR (neat):  $\nu$  2989, 2377, 2349, 2320, 1699, 1669, 1397, 1359, 1275, 1261, 1086, 984, 763, 750  $\text{cm}^{-1}$ ; HRMS (ESI)  $m/z$  calcd for  $\text{C}_{23}\text{H}_{21}\text{NO}_4\text{S}$   $[\text{M}+\text{H}]^+ = 408.1270$ , found = 408.1292.

**N-(3'-methoxy-4-oxo-[1,1'-biphenyl]-1(4H)-yl)-N-tosylacrylamide**

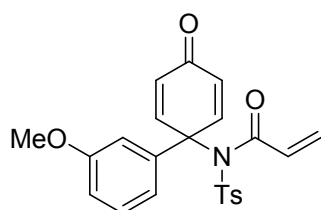

**(1j)** 28% yield; white solid; mp 149-152°C;  $^1\text{H}$  NMR (400 MHz,  $\text{CDCl}_3$ )  $\delta$  7.85 – 7.42 (m, 3H), 7.30 – 7.15 (m, 4H), 6.95 (dd,  $J = 16.2, 10.7$  Hz, 1H), 6.88 (d,  $J = 7.0$  Hz, 1H), 6.78 (d,  $J = 12.9$  Hz, 2H), 6.24 (d,  $J = 16.4$  Hz, 1H), 6.04 (d,  $J = 9.4$  Hz, 2H), 5.80 (d,  $J = 9.7$  Hz, 1H), 3.73 (s, 3H), 2.44 (s, 3H);  $^{13}\text{C}$  NMR (101 MHz,  $\text{CDCl}_3$ )  $\delta$  184.74, 169.45, 160.15, 147.81, 145.68, 140.09, 136.43, 133.30, 130.88, 130.40, 129.80, 128.51, 127.71, 117.36, 113.51, 111.38, 65.55, 55.24, 21.72; IR (neat):  $\nu$  2989, 2377, 2350, 2319, 1699, 1670, 1275, 1261, 1133, 763, 750  $\text{cm}^{-1}$ ; HRMS (ESI)  $m/z$  calcd for  $\text{C}_{23}\text{H}_{21}\text{NO}_5\text{S}$   $[\text{M}+\text{H}]^+ = 424.1219$ , found = 424.1231.

**N-(4-oxo-[1,1':4',1''-terphenyl]-1(4H)-yl)-N-tosylacrylamide**

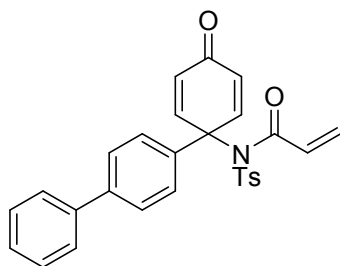

(**1k**) 59% yield; white solid; mp 113-115°C;  $^1\text{H}$  NMR (400 MHz,  $\text{CDCl}_3$ )  $\delta$  7.64 (d,  $J$  = 8.1 Hz, 2H), 7.51 (t,  $J$  = 7.3 Hz, 4H), 7.41 (t,  $J$  = 7.5 Hz, 2H), 7.35 (d,  $J$  = 9.3 Hz, 5H), 7.29 (d,  $J$  = 8.2 Hz, 2H), 6.98 (dd,  $J$  = 16.8, 10.2 Hz, 1H), 6.25 (d,  $J$  = 16.8 Hz, 1H), 6.07 (d,  $J$  = 10.1 Hz, 2H), 5.81 (d,  $J$  = 10.3 Hz, 1H), 2.45 (s, 3H);  $^{13}\text{C}$  NMR (101 MHz,  $\text{CDCl}_3$ )  $\delta$  184.73, 169.51, 147.92, 145.74, 141.44, 139.84, 137.38, 136.41, 133.28, 131.03, 129.85, 129.61, 128.84, 128.53, 128.03, 127.73, 127.03, 125.51, 65.49, 21.76; IR (neat):  $\nu$  2989, 2377, 2349, 2319, 1699, 1669, 1485, 1397, 1359, 1275, 1261, 1086, 985, 763, 750  $\text{cm}^{-1}$ ; HRMS (ESI)  $m/z$  calcd for  $\text{C}_{28}\text{H}_{23}\text{NO}_4\text{S}$   $[\text{M}+\text{H}]^+$  = 470.1426, found = 470.1437.

#### N-(1-methyl-4-oxocyclohexa-2,5-dien-1-yl)-N-tosylacrylamide

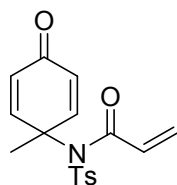

(**1l**) 30% yield; white solid; mp 76-78°C;  $^1\text{H}$  NMR (400 MHz,  $\text{CDCl}_3$ )  $\delta$  7.63 (d,  $J$  = 8.3 Hz, 2H), 7.31 – 7.25 (m, 2H), 7.10 (d,  $J$  = 10.2 Hz, 2H), 6.77 (dd,  $J$  = 16.9, 10.2 Hz, 1H), 6.47 (d,  $J$  = 16.9 Hz, 1H), 6.00 (d,  $J$  = 10.2 Hz, 2H), 5.95 (d,  $J$  = 10.3 Hz, 1H), 2.43 (s, 3H), 1.56 (s, 3H);  $^{13}\text{C}$  NMR (101 MHz,  $\text{CDCl}_3$ )  $\delta$  184.39, 170.42, 150.29, 145.39, 136.59, 134.02, 131.70, 129.78, 128.36, 127.46, 60.25, 26.93, 21.67; IR (neat):  $\nu$  2989, 2377, 2350, 2319, 1700, 1668, 1397, 1350, 1275, 1261, 1176, 1159, 1086, 1042, 971, 860, 763, 750  $\text{cm}^{-1}$ ; HRMS (ESI)  $m/z$  calcd for  $\text{C}_{17}\text{H}_{17}\text{NO}_4\text{S}$   $[\text{M}+\text{H}]^+$  = 332.0956, found = 332.0960.

#### N-(1-ethyl-4-oxocyclohexa-2,5-dien-1-yl)-N-tosylacrylamide

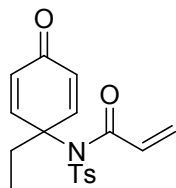

**(1m)** 61% yield; white solid; mp 89-91°C;  $^1\text{H}$  NMR (400 MHz,  $\text{CDCl}_3$ )  $\delta$  7.58 (d,  $J = 6.8$  Hz, 2H), 7.24 (d,  $J = 6.8$  Hz, 2H), 7.07 (d,  $J = 9.3$  Hz, 2H), 6.82 (dd,  $J = 16.2, 10.4$  Hz, 1H), 6.50 (d,  $J = 16.9$  Hz, 1H), 5.99 (dd,  $J = 20.5, 9.8$  Hz, 3H), 2.42 (s, 3H), 1.94 (d,  $J = 6.7$  Hz, 2H), 0.74 (s, 3H);  $^{13}\text{C}$  NMR (101 MHz,  $\text{CDCl}_3$ )  $\delta$  184.67, 170.84, 148.67, 145.41, 136.54, 134.56, 131.53, 129.68, 128.87, 128.57, 64.10, 31.02, 21.68, 8.19; IR (neat):  $\nu$  2988, 2377, 2350, 2319, 1699, 1669, 1455, 1398, 1354, 1275, 1261, 1175, 1085, 975, 763, 750  $\text{cm}^{-1}$ ; HRMS (ESI)  $m/z$  calcd for  $\text{C}_{18}\text{H}_{19}\text{NO}_4\text{S}$   $[\text{M}+\text{H}]^+ = 346.1113$ , found = 346.1112.

#### N-(4-oxo-1-vinylcyclohexa-2,5-dien-1-yl)-N-tosylacrylamide

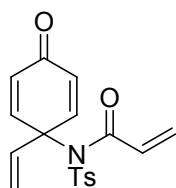

**(1n)** 68% yield; white solid; mp 111-114°C;  $^1\text{H}$  NMR (400 MHz,  $\text{CDCl}_3$ )  $\delta$  7.63 (d,  $J = 8.3$  Hz, 2H), 7.29 (s, 2H), 7.07 (d,  $J = 10.1$  Hz, 2H), 6.85 (dd,  $J = 16.9, 10.2$  Hz, 1H), 6.43 (d,  $J = 16.8$  Hz, 1H), 6.06 (d,  $J = 10.1$  Hz, 2H), 5.91 (d,  $J = 10.3$  Hz, 1H), 5.69 (dd,  $J = 17.2, 10.4$  Hz, 1H), 5.22 (d,  $J = 17.2$  Hz, 1H), 5.13 (d,  $J = 10.4$  Hz, 1H), 2.44 (s, 3H);  $^{13}\text{C}$  NMR (101 MHz,  $\text{CDCl}_3$ )  $\delta$  184.72, 169.31, 147.07, 145.57, 136.58, 134.99, 133.31, 131.37, 129.82, 128.39, 128.03, 117.09, 64.22, 21.70; IR (neat):  $\nu$  2989, 2377, 2349, 2319, 1699, 1669, 1398, 1355, 1275, 1261, 1176, 1086, 983, 924, 764, 750  $\text{cm}^{-1}$ ; HRMS (ESI)  $m/z$  calcd for  $\text{C}_{18}\text{H}_{17}\text{NO}_4\text{S}$   $[\text{M}+\text{H}]^+ = 344.0956$ , found = 344.0966.

#### N-(4-oxo-1-((trimethylsilyl)ethynyl)cyclohexa-2,5-dien-1-yl)-N-tosylacrylamide

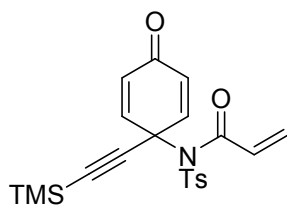

**(1o)** 87% yield; white solid; mp 136-138°C;  $^1\text{H}$  NMR (400 MHz,  $\text{CDCl}_3$ )  $\delta$  7.74 (d,  $J = 8.3$  Hz, 2H), 7.31 (d,  $J = 8.2$  Hz, 2H), 7.02 (d,  $J = 10.0$  Hz, 2H), 6.70 (dd,  $J = 16.8, 10.2$  Hz, 1H), 6.44 (d,  $J = 16.8$  Hz, 1H), 6.13 (d,  $J = 10.0$  Hz, 2H), 5.89 (d,  $J = 10.2$  Hz, 1H), 2.45 (s, 3H), 0.06 (s, 9H);  $^{13}\text{C}$  NMR (101 MHz,  $\text{CDCl}_3$ )  $\delta$  184.89, 168.86, 145.93, 145.70, 137.80, 133.28, 132.08, 130.48, 128.65, 128.45, 96.38, 95.08, 78.03, 77.71, 77.39, 57.14, 22.34, -0.00 (TMS); IR (neat):  $\nu$  2989, 2377, 2350, 2319, 1702, 1671, 1456, 1398, 1357, 1275, 1261, 1176, 1149, 853, 763, 750  $\text{cm}^{-1}$ ; HRMS (ESI)  $m/z$  calcd for  $\text{C}_{21}\text{H}_{23}\text{NO}_4\text{SSi}$   $[\text{M}+\text{H}]^+ = 414.1195$ , found = 414.1207.

#### N-(1-cyclopentyl-4-oxocyclohexa-2,5-dien-1-yl)-N-tosylacrylamide

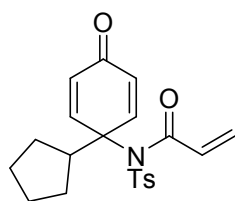

**(1p)** 20% yield; oil solid;  $^1\text{H}$  NMR (400 MHz,  $\text{CDCl}_3$ )  $\delta$  7.54 (d,  $J = 8.1$  Hz, 2H), 7.22 (d,  $J = 7.9$  Hz, 2H), 7.06 (d,  $J = 10.2$  Hz, 2H), 6.82 (dd,  $J = 16.9, 10.1$  Hz, 1H), 6.50 (d,  $J = 16.9$  Hz, 1H), 6.01 (d,  $J = 10.2$  Hz, 2H), 5.94 (d,  $J = 10.1$  Hz, 1H), 2.93 – 2.72 (m, 1H), 2.40 (s, 3H), 1.46 (s, 6H), 1.28 – 1.18 (m, 2H);  $^{13}\text{C}$  NMR (101 MHz,  $\text{CDCl}_3$ )  $\delta$  184.82, 171.16, 147.31, 145.37, 136.52, 134.76, 130.89, 129.72, 129.61, 128.70, 66.26, 43.10, 27.62, 26.11, 21.68; IR (neat):  $\nu$  2988, 2377, 2350, 2319, 1698, 1670, 1398, 1355, 1275, 1261, 1175, 1085, 980, 763, 750  $\text{cm}^{-1}$ ; HRMS (ESI)  $m/z$  calcd for  $\text{C}_{21}\text{H}_{23}\text{NO}_4\text{S}$   $[\text{M}+\text{H}]^+ = 386.1426$ , found = 386.1473.

#### N-(4-oxo-[1,1'-bi(cyclohexane)]-2,5-dien-1-yl)-N-tosylacrylamide

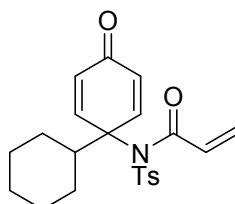

**(1q)** 44% yield; oil solid;  $^1\text{H}$  NMR (400 MHz,  $\text{CDCl}_3$ )  $\delta$  7.54 (d,  $J = 8.1$  Hz, 2H), 7.22 (d,  $J = 8.0$  Hz, 2H), 7.06 (d,  $J = 10.2$  Hz, 2H), 6.90 (dd,  $J = 16.9, 10.1$  Hz, 1H), 6.48 (d,  $J = 16.9$  Hz, 1H), 6.01 (d,  $J = 10.2$  Hz, 2H), 5.89 (d,  $J = 10.1$  Hz, 1H), 2.40 (s, 3H), 2.17 (t,  $J = 11.9$  Hz, 1H), 1.69 (d,  $J = 12.5$  Hz, 2H), 1.58 (d,  $J = 11.2$  Hz, 3H), 1.17 – 0.98 (m, 3H), 0.89 (dd,  $J = 23.6, 11.6$  Hz, 2H);  $^{13}\text{C}$  NMR (101 MHz,  $\text{CDCl}_3$ )  $\delta$  184.94, 170.62, 147.30, 145.31, 136.84, 134.60, 130.34, 129.75, 129.60, 128.53, 67.56, 42.04, 27.55, 26.27, 26.05, 21.66; IR (neat):  $\nu$  2988, 2933, 2857, 2377, 2350, 2319, 1698, 1670, 1398, 1355, 1275, 1261, 1175, 1085, 980, 763, 750  $\text{cm}^{-1}$ ; HRMS (ESI)  $m/z$  calcd for  $\text{C}_{22}\text{H}_{25}\text{NO}_4\text{S}$   $[\text{M}+\text{H}]^+ = 400.1583$ , found = 400.1592.

**N-(4'-bromo-4-oxo-[1,1'-biphenyl]-1(4H)-yl)-N-(phenylsulfonyl)acrylamide**

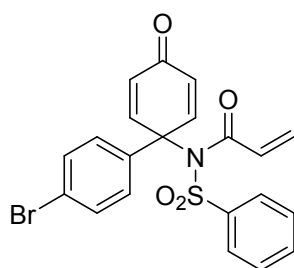

**(1r)** 72% yield; white solid; mp 125-127°C;  $^1\text{H}$  NMR (400 MHz,  $\text{CDCl}_3$ )  $\delta$  7.74 (d,  $J = 7.7$  Hz, 2H), 7.64 (t,  $J = 7.4$  Hz, 1H), 7.50 (t,  $J = 7.8$  Hz, 2H), 7.40 (d,  $J = 8.6$  Hz, 2H), 7.26 (d,  $J = 10.0$  Hz, 2H), 7.17 (d,  $J = 8.6$  Hz, 2H), 6.95 (dd,  $J = 16.8, 10.2$  Hz, 1H), 6.26 (d,  $J = 16.8$  Hz, 1H), 6.04 (d,  $J = 10.2$  Hz, 2H), 5.83 (d,  $J = 10.3$  Hz, 1H);  $^{13}\text{C}$  NMR (101 MHz,  $\text{CDCl}_3$ )  $\delta$  184.33, 169.34, 147.23, 139.20, 137.79, 134.52, 133.06, 132.55, 131.52, 129.33, 128.44, 127.97, 126.69, 122.74, 65.14; IR (neat):  $\nu$  2989, 2924, 2377, 2349, 2319, 1699, 1670, 1397, 1360, 1275, 1261, 1183, 1134, 1086, 985, 763, 750  $\text{cm}^{-1}$ ; HRMS (ESI)  $m/z$  calcd for  $\text{C}_{21}\text{H}_{16}\text{BrNO}_4\text{S}$   $[\text{M}+\text{H}]^+ = 458.0062$ , found = 458.0049.

**N-((4-bromophenyl)sulfonyl)-N-(4-oxo-[1,1'-biphenyl]-1(4H)-yl)acrylamide**

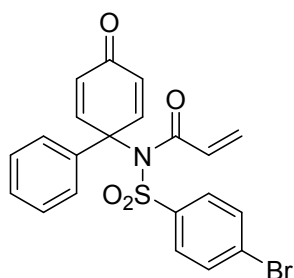

(**1s**) 71% yield; white solid; mp 121-123°C; <sup>1</sup>H NMR (400 MHz, CDCl<sub>3</sub>) δ 7.64 (d, *J* = 8.6 Hz, 2H), 7.59 (d, *J* = 8.7 Hz, 2H), 7.35 – 7.27 (m, 7H), 6.87 (dd, *J* = 16.9, 10.2 Hz, 1H), 6.25 (d, *J* = 16.8 Hz, 1H), 6.11 (d, *J* = 10.2 Hz, 2H), 5.82 (d, *J* = 10.2 Hz, 1H); <sup>13</sup>C NMR (101 MHz, CDCl<sub>3</sub>) δ 184.45, 169.36, 147.80, 138.32, 138.19, 133.08, 132.55, 131.68, 129.84, 129.67, 129.45, 128.81, 127.94, 125.23, 65.68; IR (neat): ν 3007, 2989, 2377, 2349, 2319, 1701, 1670, 1548, 1394, 1361, 1275, 1261, 1185, 1132, 1085, 1068, 984, 763, 750 cm<sup>-1</sup>; HRMS (ESI) *m/z* calcd for C<sub>21</sub>H<sub>16</sub>BrNO<sub>4</sub>S [M+H]<sup>+</sup> =458.0062, found =458.0056.

**N-(4-oxo-[1,1'-biphenyl]-1(4H)-yl)-N-((4-(trifluoromethyl)phenyl)sulfonyl)acrylamide**

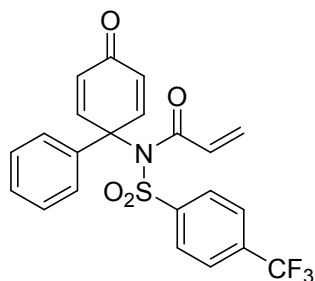

(**1t**) 37% yield; white solid; mp 111-113°C; <sup>1</sup>H NMR (400 MHz, CDCl<sub>3</sub>) δ 7.87 (d, *J* = 8.3 Hz, 2H), 7.76 (d, *J* = 8.4 Hz, 2H), 7.33 (s, 1H), 7.31 (s, 1H), 7.27 (d, *J* = 4.8 Hz, 5H), 6.85 (dd, *J* = 16.8, 10.2 Hz, 1H), 6.28 (d, *J* = 16.7 Hz, 1H), 6.10 (d, *J* = 10.2 Hz, 2H), 5.84 (d, *J* = 10.3 Hz, 1H); <sup>13</sup>C NMR (101 MHz, CDCl<sub>3</sub>) δ 184.25, 169.25, 147.60, 142.85, 137.93, 135.93, 135.59, 132.94, 132.12, 129.46, 128.96 (d, *J* = 5.5 Hz), 128.05, 126.35 (d, *J* = 3.7 Hz), 125.38, 124.23, 121.52, 65.72; IR (neat): ν 3007, 2989, 2377, 2350, 2319, 1701, 1671, 1401, 1364, 1275, 1261, 1177, 1133, 1062, 984, 763, 750 cm<sup>-1</sup>; HRMS (ESI) *m/z* calcd for C<sub>21</sub>H<sub>16</sub>BrNO<sub>4</sub>S [M+H]<sup>+</sup> =448.0830, found =448.0823.

**N-(3-chloro-4-oxo-[1,1'-biphenyl]-1(4H)-yl)-N-tosylacrylamide**

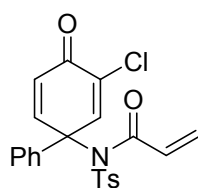

(**1u**) 70% yield; white solid; mp 132-134°C; <sup>1</sup>H NMR (400 MHz, CDCl<sub>3</sub>) δ 7.70 –

7.52 (m, 2H), 7.43 (d,  $J = 2.9$  Hz, 1H), 7.37 (dt,  $J = 10.1, 2.9$  Hz, 1H), 7.34 – 7.23 (m, 7H), 6.96 (ddd,  $J = 16.8, 10.2, 2.9$  Hz, 1H), 6.24 (dd,  $J = 16.9, 1.9$  Hz, 1H), 6.14 (dd,  $J = 10.1, 3.0$  Hz, 1H), 5.82 (dd,  $J = 10.2, 1.9$  Hz, 1H), 2.45 (d,  $J = 2.3$  Hz, 3H);  $^{13}\text{C}$  NMR (101 MHz,  $\text{CDCl}_3$ )  $\delta$  177.74, 169.50, 148.81, 146.26, 143.21, 137.92, 135.76, 133.33, 132.74, 131.11, 130.10, 129.58, 128.95, 128.33, 125.53, 124.96, 66.93, 21.76; IR (neat):  $\nu$  3007, 2989, 2377, 2350, 2319, 1699, 1677, 1275, 1261, 763, 750  $\text{cm}^{-1}$ ; HRMS (ESI)  $m/z$  calcd for  $\text{C}_{22}\text{H}_{18}\text{ClNO}_4\text{S}$   $[\text{M}+\text{H}]^+ = 428.0723$ , found = 428.0778.

#### N-(2-methoxy-4-oxo-[1,1'-biphenyl]-1(4H)-yl)-N-tosylacrylamide

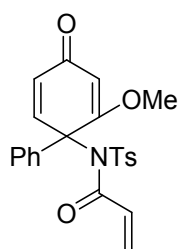

(**1v**) 30% yield; white solid; mp 63-65°C;  $^1\text{H}$  NMR (400 MHz,  $\text{CDCl}_3$ )  $\delta$  7.70 (d,  $J = 8.1$  Hz, 2H), 7.44 – 7.36 (m, 2H), 7.35 – 7.22 (m, 6H), 6.78 (dd,  $J = 16.8, 10.3$  Hz, 1H), 6.42 (d,  $J = 10.0$  Hz, 1H), 6.08 (d,  $J = 16.8$  Hz, 1H), 5.61 (d,  $J = 10.3$  Hz, 1H), 5.52 (s, 1H), 3.73 (s, 3H), 2.43 (s, 3H);  $^{13}\text{C}$  NMR (101 MHz,  $\text{CDCl}_3$ )  $\delta$  186.20, 173.38, 168.70, 145.15, 143.98, 137.87, 137.30, 131.54, 131.26, 129.63, 129.28, 128.62, 128.60, 128.28, 126.23, 102.32, 67.94, 56.20, 21.69; IR (neat):  $\nu$  3007, 2989, 2377, 2349, 2314, 1699, 1661, 1594, 1356, 1275, 1261, 1226, 1151, 1058, 985, 763, 750  $\text{cm}^{-1}$ ; HRMS (ESI)  $m/z$  calcd for  $\text{C}_{23}\text{H}_{21}\text{NO}_4\text{S}$   $[\text{M}+\text{H}]^+ = 424.1219$ , found = 424.1225.

#### N-(4-oxocyclopent-2-en-1-yl)-N-tosylacrylamide

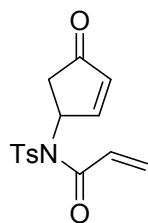

(**1w**) 30% yield; white solid; mp 88-90°C;  $^1\text{H}$  NMR (400 MHz,  $\text{CDCl}_3$ )  $\delta$  7.76 (d,  $J = 8.4$  Hz, 2H), 7.46 – 7.39 (m, 2H), 7.39 (s, 1H), 7.06 (dd,  $J = 16.7, 10.4$  Hz, 1H), 6.34 (dd,  $J = 16.7, 1.5$  Hz, 1H), 6.26 (dd,  $J = 5.7, 2.4$  Hz, 1H), 5.81 (dd,  $J = 10.4, 1.5$  Hz,



1H), 5.49 (ddd,  $J = 7.3, 4.9, 2.4$  Hz, 1H), 2.59 (s, 1H), 2.58 (s, 1H), 2.48 (s, 3H);  $^{13}\text{C}$  NMR (101 MHz,  $\text{CDCl}_3$ )  $\delta$  204.65, 166.12, 161.08, 145.75, 136.43, 134.42, 131.73, 130.39, 129.40, 127.25, 58.33, 39.87, 21.72; IR (neat):  $\nu$  3007, 2989, 2377, 2349, 2319, 1717, 1687, 1548, 1275, 1261, 1159, 763, 750  $\text{cm}^{-1}$ ; HRMS (ESI)  $m/z$  calcd for  $\text{C}_{15}\text{H}_{15}\text{NO}_4\text{S}$   $[\text{M}+\text{H}]^+ = 306.0800$ , found = 306.0834.

**(3aR,7aR)-3-methylene-7a-phenyl-1-tosyl-1,3a,4,7a-tetrahydro-2H-indole-2,5(3H)-dione**

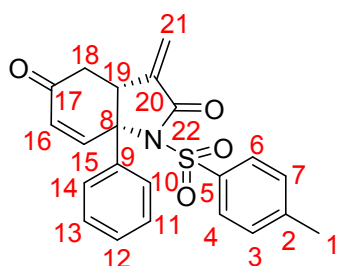

**(2a)** 94% yield; white solid; mp 150-152°C;  $[\alpha]_{\text{D}}^{28} = -70.1$  ( $c = 0.5$ ,  $\text{CH}_2\text{Cl}_2$ );  $^1\text{H}$  NMR (400 MHz,  $\text{CDCl}_3$ )  $\delta$  7.85 (d,  $J = 8.1$  Hz, 2H), 7.52 (d,  $J = 10.5$  Hz, 1H), 7.45 (d,  $J = 6.5$  Hz, 3H), 7.41 (d,  $J = 7.5$  Hz, 2H), 7.33 (d,  $J = 8.1$  Hz, 2H), 6.33 (d,  $J = 10.5$  Hz, 1H), 6.24 (d,  $J = 3.0$  Hz, 1H), 5.45 (d,  $J = 2.6$  Hz, 1H), 3.42 (s, 1H), 2.69 (dd,  $J = 16.8, 3.0$  Hz, 1H), 2.60 (dd,  $J = 16.8, 5.3$  Hz, 1H), 2.45 (s, 3H);  $^{13}\text{C}$  NMR (101 MHz,  $\text{CDCl}_3$ )  $\delta$  194.59 (C=O, C17), 165.83 (C=O, C22), 145.70 (C20), 144.65 (C, Ar), 139.54 (CH, C15), 138.41 (C, Ar), 135.56 (C, Ar), 130.33 (CH, C16), 129.40 (CH, Ar), 129.22 (CH, Ar), 128.99 (CH, Ar), 128.90 (CH, Ar), 125.84 (CH, Ar), 120.69 (CH<sub>2</sub>, C21), 69.98 (C8), 48.81 (CH, C19), 35.09 (CH<sub>2</sub>, C18), 21.78 (CH<sub>3</sub>, C1); IR (neat):  $\nu$  3006, 2989, 2321, 1730, 1694, 1359, 1275, 1261, 1173, 1153, 1068, 763, 750  $\text{cm}^{-1}$ ; HRMS (ESI)  $m/z$  calcd for  $\text{C}_{22}\text{H}_{19}\text{NO}_4\text{S}$   $[\text{M}+\text{H}]^+ = 394.1113$ , found = 394.1131; Enantiomeric excess: 96%, determined by HPLC (Chiralpak OD-H, hexane/2-propanol = 80/20; flow rate 1.0 mL/min; 25°C;  $\lambda = 220$  nm) first peak:  $t_{\text{R}} = 18.3$  min, second peak:  $t_{\text{R}} = 23.3$  min.

**(3aR,7aR)-7a-(4-fluorophenyl)-3-methylene-1-tosyl-1,3a,4,7a-tetrahydro-2H-indole-2,5(3H)-dione**

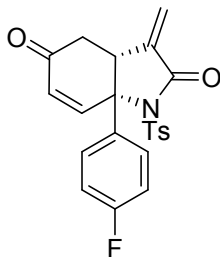

**(2b)** 75% yield; white solid; mp 181-183°C;  $[\alpha]_D^{28} = -64.9$  ( $c = 0.5$ ,  $\text{CH}_2\text{Cl}_2$ );  $^1\text{H}$  NMR (400 MHz,  $\text{CDCl}_3$ )  $\delta$  7.85 (d,  $J = 8.0$  Hz, 2H), 7.49 (d,  $J = 10.2$  Hz, 1H), 7.43 – 7.37 (m, 2H), 7.34 (d,  $J = 7.9$  Hz, 2H), 7.15 (t,  $J = 8.2$  Hz, 2H), 6.33 (d,  $J = 10.4$  Hz, 1H), 6.24 (s, 1H), 5.46 (s, 1H), 3.38 (s, 1H), 2.70 (d,  $J = 15.8$  Hz, 1H), 2.59 (dd,  $J = 16.8$ , 5.1 Hz, 1H), 2.46 (s, 3H);  $^{13}\text{C}$  NMR (101 MHz,  $\text{CDCl}_3$ )  $\delta$  194.25, 165.64, 164.00, 161.53, 145.85, 144.23, 138.14, 135.48, 130.43, 129.48, 129.14, 127.76 (d,  $J = 8.3$  Hz), 120.91, 116.04 (d,  $J = 21.9$  Hz), 69.40, 48.86, 34.99, 21.78; IR (neat):  $\nu$  3007, 2989, 2377, 2349, 2320, 1734, 1697, 1511, 1275, 1261, 1173, 763, 750  $\text{cm}^{-1}$ ; HRMS (ESI)  $m/z$  calcd for  $\text{C}_{22}\text{H}_{18}\text{FNO}_4\text{S}$   $[\text{M}+\text{H}]^+ = 412.1019$ , found = 412.1031; Enantiomeric excess: 96%, determined by HPLC (Chiralpak OD-H, hexane/2-propanol = 80/20; flow rate 1.0 mL/min; 25°C;  $\lambda = 220$  nm) first peak:  $t_R = 16.0$  min, second peak:  $t_R = 21.2$  min.

**(3aR,7aR)-7a-(4-chlorophenyl)-3-methylene-1-tosyl-1,3a,4,7a-tetrahydro-2H-indole-2,5(3H)-dione**

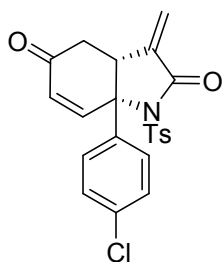

**(2c)** 77% yield; white solid; mp 105-107°C;  $[\alpha]_D^{28} = -84.6$  ( $c = 0.4$ ,  $\text{CH}_2\text{Cl}_2$ );  $^1\text{H}$  NMR (400 MHz,  $\text{CDCl}_3$ )  $\delta$  7.86 (d,  $J = 7.4$  Hz, 2H), 7.45 (dd,  $J = 13.9$ , 9.2 Hz, 3H), 7.40 – 7.30 (m, 4H), 6.34 (d,  $J = 10.4$  Hz, 1H), 6.25 (s, 1H), 5.46 (s, 1H), 3.36 (s, 1H), 2.70 (d,  $J = 16.7$  Hz, 1H), 2.58 (dd,  $J = 16.9$ , 4.6 Hz, 1H), 2.46 (s, 3H);  $^{13}\text{C}$  NMR (101 MHz,  $\text{CDCl}_3$ )  $\delta$  194.16, 165.61, 145.90, 143.95, 138.28, 138.05, 135.39, 134.92, 130.59, 129.50, 129.23, 129.18, 127.25, 121.01, 69.37, 48.73, 34.97, 21.78; IR (neat):  $\nu$  3006, 2989, 2377, 2350, 2320, 1733, 1696, 1572, 1275, 1261, 1173, 1120, 1087,

763, 750  $\text{cm}^{-1}$ ; HRMS (ESI)  $m/z$  calcd for  $\text{C}_{22}\text{H}_{18}\text{ClNO}_4\text{S}$   $[\text{M}+\text{H}]^+ = 428.0723$ , found = 428.0721; Enantiomeric excess: 87%, determined by HPLC (Chiralpak OD-H, hexane/2-propanol = 80/20; flow rate 1.0 mL/min; 25°C;  $\lambda = 220$  nm) first peak:  $t_R = 17.5$  min, second peak:  $t_R = 22.5$  min.

**(3aR,7aR)-7a-(3-chlorophenyl)-3-methylene-1-tosyl-1,3a,4,7a-tetrahydro-2H-indole-2,5(3H)-dione**

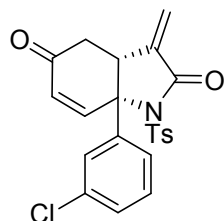

**(2d)** 82% yield; white solid; mp 214-217°C;  $[\alpha]_D^{28} = -58.5$  ( $c = 0.5$ ,  $\text{CH}_2\text{Cl}_2$ );  $^1\text{H}$  NMR (400 MHz,  $\text{CDCl}_3$ )  $\delta$  7.85 (d,  $J = 8.0$  Hz, 2H), 7.46 (d,  $J = 10.5$  Hz, 1H), 7.41 (d,  $J = 5.1$  Hz, 2H), 7.36 (d,  $J = 8.1$  Hz, 2H), 7.32 (d,  $J = 6.5$  Hz, 2H), 6.35 (d,  $J = 10.4$  Hz, 1H), 6.27 (d,  $J = 2.6$  Hz, 1H), 5.47 (s, 1H), 3.37 (s, 1H), 2.72 (d,  $J = 15.0$  Hz, 1H), 2.60 (dd,  $J = 16.9, 5.2$  Hz, 1H), 2.47 (s, 3H);  $^{13}\text{C}$  NMR (101 MHz,  $\text{CDCl}_3$ )  $\delta$  194.13, 165.61, 145.93, 143.86, 141.66, 138.03, 135.35, 135.14, 130.67, 130.32, 129.60, 129.17, 129.15, 126.13, 124.18, 121.05, 69.45, 48.62, 34.90, 21.79; IR (neat):  $\nu$  3007, 2989, 2377, 2349, 2320, 1733, 1696, 1572, 1275, 1261, 1173, 1120, 1087, 763, 750  $\text{cm}^{-1}$ ; HRMS (ESI)  $m/z$  calcd for  $\text{C}_{22}\text{H}_{18}\text{ClNO}_4\text{S}$   $[\text{M}+\text{H}]^+ = 428.0723$ , found = 428.0717; Enantiomeric excess: 96%, determined by HPLC (Chiralpak OD-H, hexane/2-propanol = 85/15; flow rate 1.0 mL/min; 25°C;  $\lambda = 220$  nm) first peak:  $t_R = 20.8$  min, second peak:  $t_R = 23.1$  min.

**(3aR,7aR)-7a-(4-bromophenyl)-3-methylene-1-tosyl-1,3a,4,7a-tetrahydro-2H-indole-2,5(3H)-dione**

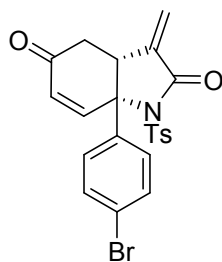

**(2e)** 68% yield; white solid; mp 108-110°C;  $[\alpha]_D^{28} = -82.9$  ( $c = 0.5$ ,  $\text{CH}_2\text{Cl}_2$ );  $^1\text{H}$  NMR (400 MHz,  $\text{CDCl}_3$ )  $\delta$  7.86 (d,  $J = 6.8$  Hz, 2H), 7.59 (d,  $J = 7.0$  Hz, 2H), 7.46 (d,  $J = 9.9$  Hz, 1H), 7.33 (dd,  $J = 18.9, 7.2$  Hz, 4H), 6.33 (d,  $J = 10.1$  Hz, 1H), 6.24 (s, 1H), 5.46 (s, 1H), 3.35 (s, 1H), 2.70 (d,  $J = 16.0$  Hz, 1H), 2.58 (d,  $J = 16.0$  Hz, 1H), 2.46 (s, 3H);  $^{13}\text{C}$  NMR (101 MHz,  $\text{CDCl}_3$ )  $\delta$  194.13, 165.60, 145.90, 143.87, 138.84, 138.03, 135.38, 132.18, 130.62, 129.50, 129.19, 127.52, 123.06, 121.03, 69.42, 48.69, 34.97, 21.78; IR (neat):  $\nu$  3007, 2989, 2377, 2350, 2320, 1733, 1697, 1572, 1275, 1261, 763, 750  $\text{cm}^{-1}$ ; HRMS (ESI)  $m/z$  calcd for  $\text{C}_{22}\text{H}_{18}\text{BrNO}_4\text{S}$   $[\text{M}+\text{H}]^+ = 472.0218$ , found = 472.0223; Enantiomeric excess: 88%, determined by HPLC (Chiralpak OD-H, hexane/2-propanol = 80/20; flow rate 1.0 mL/min; 25°C;  $\lambda = 220$  nm) first peak:  $t_R = 20.1$  min, second peak:  $t_R = 24.9$  min.

**(3aR,7aR)-3-methylene-1-tosyl-7a-(4-(trifluoromethyl)phenyl)-1,3a,4,7a-tetrahydro-2H-indole-2,5(3H)-dione**

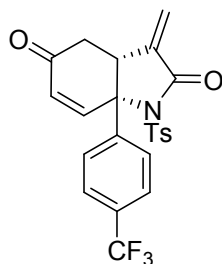

**(2f)** 66% yield; white solid; mp 206-208°C;  $[\alpha]_D^{28} = -80.1$  ( $c = 0.5$ ,  $\text{CH}_2\text{Cl}_2$ );  $^1\text{H}$  NMR (400 MHz,  $\text{CDCl}_3$ )  $\delta$  7.86 (d,  $J = 8.1$  Hz, 2H), 7.73 (d,  $J = 8.1$  Hz, 2H), 7.57 (d,  $J = 8.0$  Hz, 2H), 7.49 (d,  $J = 10.4$  Hz, 1H), 7.36 (d,  $J = 8.0$  Hz, 2H), 6.38 (d,  $J = 10.5$  Hz, 1H), 6.27 (d,  $J = 2.8$  Hz, 1H), 5.48 (d,  $J = 2.3$  Hz, 1H), 3.38 (s, 1H), 2.77 – 2.66 (m, 1H), 2.58 (dd,  $J = 16.9, 5.3$  Hz, 1H), 2.47 (s, 3H);  $^{13}\text{C}$  NMR (101 MHz,  $\text{CDCl}_3$ )  $\delta$  193.97, 165.54, 146.06, 143.85, 143.49, 137.86, 135.22, 130.90, 129.57, 129.20, 126.24, 126.15, 126.10 (d,  $J = 3.6$  Hz), 126.04, 121.32, 69.33, 48.62, 34.97, 21.79; IR (neat):  $\nu$  3007, 2989, 2377, 2350, 2320, 1734, 1698, 1548, 1327, 1275, 1261, 1172, 763, 750  $\text{cm}^{-1}$ ; HRMS (ESI)  $m/z$  calcd for  $\text{C}_{23}\text{H}_{18}\text{F}_3\text{NO}_4\text{S}$   $[\text{M}+\text{H}]^+ = 462.0987$ , found = 462.0981; Enantiomeric excess: 90%, determined by HPLC (Chiralpak OD-H, hexane/2-propanol = 85/15; flow rate 1.0 mL/min; 25°C;  $\lambda = 220$  nm) first peak:  $t_R = 17.3$  min, second peak:  $t_R = 24.2$  min.

**(3aR,7aR)-7a-(3,5-bis(trifluoromethyl)phenyl)-3-methylene-1-tosyl-1,3a,4,7a-tetrahydro-2H-indole-2,5(3H)-dione**

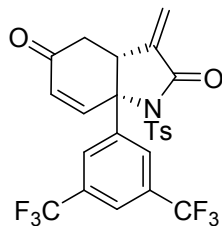

**(2g)** 93% yield; white solid; mp 112-114°C;  $[\alpha]_D^{28} = -71.3$  ( $c = 0.5$ ,  $\text{CH}_2\text{Cl}_2$ );  $^1\text{H}$  NMR (400 MHz,  $\text{CDCl}_3$ )  $\delta$  7.99 (s, 1H), 7.90 – 7.78 (m, 4H), 7.49 (d,  $J = 10.4$  Hz, 1H), 7.36 (d,  $J = 8.1$  Hz, 2H), 6.44 (d,  $J = 10.4$  Hz, 1H), 6.34 (d,  $J = 2.6$  Hz, 1H), 5.53 (s, 1H), 3.35 (s, 1H), 2.78 (d,  $J = 16.8$  Hz, 1H), 2.56 (dd,  $J = 17.0, 5.2$  Hz, 1H), 2.47 (s, 3H);  $^{13}\text{C}$  NMR (101 MHz,  $\text{CDCl}_3$ )  $\delta$  193.28, 165.41, 146.40, 142.93, 142.41, 137.32, 134.88, 132.78, 132.44, 131.64, 129.72, 129.11, 125.98 (d,  $J = 2.3$  Hz), 123.09 (d,  $J = 3.4$  Hz), 121.95, 68.93, 48.54, 34.62, 21.78; IR (neat):  $\nu$  3006, 2989, 2377, 2350, 2320, 1732, 1696, 1366, 1277, 1261, 1175, 1136, 1018, 901, 763, 750  $\text{cm}^{-1}$ ; HRMS (ESI)  $m/z$  calcd for  $\text{C}_{24}\text{H}_{17}\text{F}_6\text{NO}_4\text{S}$   $[\text{M}+\text{H}]^+ = 530.0861$ , found = 530.0867; Enantiomeric excess: 95%, determined by HPLC (Chiralpak AD-H, hexane/2-propanol = 90/10; flow rate 1.0 mL/min; 25°C;  $\lambda = 220$  nm) first peak:  $t_R = 6.9$  min, second peak:  $t_R = 12.1$  min.

**(3aR,7aR)-3-methylene-1-tosyl-7a-(3,4,5-trifluorophenyl)-1,3a,4,7a-tetrahydro-2H-indole-2,5(3H)-dione**

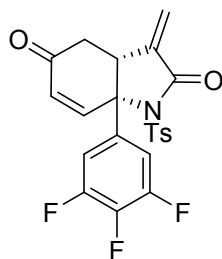

**(2h)** 83% yield; white solid; mp 197-199°C;  $[\alpha]_D^{28} = -118.1$  ( $c = 0.5$ ,  $\text{CH}_2\text{Cl}_2$ );  $^1\text{H}$  NMR (400 MHz,  $\text{CDCl}_3$ )  $\delta$  7.82 (d,  $J = 8.2$  Hz, 2H), 7.44 (d,  $J = 10.4$  Hz, 1H), 7.34 (d,  $J = 8.1$  Hz, 2H), 7.18 (dd,  $J = 14.0, 6.4$  Hz, 1H), 7.10 (dd,  $J = 16.2, 7.7$  Hz, 1H), 6.30 (t,  $J = 7.3$  Hz, 2H), 5.50 (d,  $J = 2.7$  Hz, 1H), 3.67 (s, 1H), 2.76 (dd,  $J = 17.0, 2.6$  Hz, 1H), 2.58 (dd,  $J = 16.9, 5.4$  Hz, 1H), 2.46 (s, 3H);  $^{13}\text{C}$  NMR (101 MHz,  $\text{CDCl}_3$ )  $\delta$  192.70, 163.86, 145.01, 142.15, 136.61, 133.89, 129.14, 128.48, 127.73, 122.88, 121.70, 120.38, 111.43 (d,  $J = 3.9$  Hz), 111.26 (d,  $J = 3.8$  Hz), 65.79, 44.06, 34.36,

20.75; IR (neat):  $\nu$  3006, 2989, 2377, 2350, 2320, 1732, 1697, 1513, 1476, 1275, 1261, 1188, 1173, 1153, 1170, 1011, 763, 750  $\text{cm}^{-1}$ ; HRMS (ESI)  $m/z$  calcd for  $\text{C}_{22}\text{H}_{16}\text{F}_3\text{NO}_4\text{S}$   $[\text{M}+\text{H}]^+ = 448.0830$ , found = 448.0834; Enantiomeric excess: 97%, determined by HPLC (Chiralpak OD-H, hexane/2-propanol = 80/20; flow rate 1.0 mL/min; 25°C;  $\lambda = 220$  nm) first peak:  $t_R = 16.1$  min, second peak:  $t_R = 18.6$  min.

**(3aR,7aR)-3-methylene-7a-(m-tolyl)-1-tosyl-1,3a,4,7a-tetrahydro-2H-indole-2,5(3H)-dione**

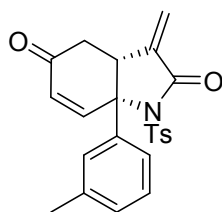

**(2i)** 91% yield; white solid; mp 152-154°C;  $[\alpha]_D^{28} = -64.1$  ( $c = 0.5$ ,  $\text{CH}_2\text{Cl}_2$ );  $^1\text{H}$  NMR (400 MHz,  $\text{CDCl}_3$ )  $\delta$  7.84 (d,  $J = 8.3$  Hz, 2H), 7.51 (dd,  $J = 10.5, 1.4$  Hz, 1H), 7.34 (t,  $J = 7.5$  Hz, 3H), 7.24 (d,  $J = 7.5$  Hz, 1H), 7.19 (d,  $J = 7.8$  Hz, 1H), 7.14 (s, 1H), 6.32 (d,  $J = 10.5$  Hz, 1H), 6.24 (d,  $J = 3.2$  Hz, 1H), 5.44 (d,  $J = 2.9$  Hz, 1H), 3.40 (s, 1H), 2.68 (dd,  $J = 16.8, 2.9$  Hz, 1H), 2.60 (dd,  $J = 16.8, 5.3$  Hz, 1H), 2.46 (s, 3H), 2.37 (s, 3H);  $^{13}\text{C}$  NMR (101 MHz,  $\text{CDCl}_3$ )  $\delta$  194.69, 165.87, 145.64, 144.88, 139.36, 138.67, 138.53, 135.68, 130.20, 129.69, 129.36, 129.18, 128.84, 126.47, 123.06, 120.55, 70.07, 48.78, 35.08, 21.76, 21.60; IR (neat):  $\nu$  3006, 2989, 2377, 2350, 2320, 1732, 1694, 1275, 1260, 1231, 1173, 1151, 763, 750  $\text{cm}^{-1}$ ; HRMS (ESI)  $m/z$  calcd for  $\text{C}_{23}\text{H}_{21}\text{NO}_4\text{S}$   $[\text{M}+\text{Na}]^+ = 430.1089$ , found = 430.1153; Enantiomeric excess: 98%, determined by HPLC (Chiralpak OD-H, hexane/2-propanol = 80/20; flow rate 1.0 mL/min; 25°C;  $\lambda = 220$  nm) first peak:  $t_R = 13.3$  min, second peak:  $t_R = 15.8$  min.

**(3aR,7aR)-7a-(3-methoxyphenyl)-3-methylene-1-tosyl-1,3a,4,7a-tetrahydro-2H-indole-2,5(3H)-dione**

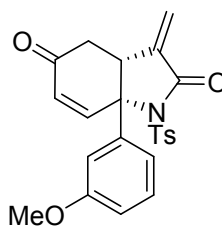

**(2j)** 73% yield; white solid; mp 162-164°C;  $[\alpha]_D^{28} = -70.8$  ( $c = 0.45$ ,  $\text{CH}_2\text{Cl}_2$ );  $^1\text{H}$  NMR (400 MHz,  $\text{CDCl}_3$ )  $\delta$  7.87 (d,  $J = 7.9$  Hz, 2H), 7.49 (d,  $J = 10.3$  Hz, 1H), 7.35 (dd,  $J = 17.8, 8.0$  Hz, 3H), 7.02 – 6.93 (m, 2H), 6.91 (s, 1H), 6.32 (d,  $J = 10.4$  Hz, 1H), 6.23 (d,  $J = 1.8$  Hz, 1H), 5.44 (s, 1H), 3.80 (s, 3H), 3.42 (s, 1H), 2.69 (dd,  $J = 16.9, 2.1$  Hz, 1H), 2.62 (dd,  $J = 16.9, 5.0$  Hz, 1H), 2.45 (s, 3H);  $^{13}\text{C}$  NMR (101 MHz,  $\text{CDCl}_3$ )  $\delta$  194.64, 165.82, 160.00, 145.69, 144.54, 141.13, 138.42, 135.56, 130.28, 130.09, 129.40, 129.24, 120.67, 118.10, 113.94, 111.97, 69.91, 55.34, 48.66, 35.18, 21.77; IR (neat):  $\nu$  3006, 2989, 2377, 2349, 2320, 1733, 1696, 1275, 1261, 1151, 763, 750  $\text{cm}^{-1}$ ; HRMS (ESI)  $m/z$  calcd for  $\text{C}_{23}\text{H}_{21}\text{NO}_5\text{S}$   $[\text{M}+\text{Na}]^+ = 446.1038$ , found = 446.1026; Enantiomeric excess: >99%, determined by HPLC (Chiralpak OD-H, hexane/2-propanol = 80/20; flow rate 1.0 mL/min; 25°C;  $\lambda = 220$  nm) first peak:  $t_R = 27.4$  min, second peak:  $t_R = 34.1$  min.

**(3aR,7aR)-7a-([1,1'-biphenyl]-4-yl)-3-methylene-1-tosyl-1,3a,4,7a-tetrahydro-2H-indole-2,5(3H)-dione**

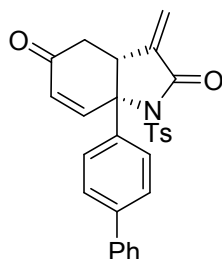

**(2k)** 77% yield; white solid; mp 103-105°C;  $[\alpha]_D^{28} = -78.9$  ( $c = 0.5$ ,  $\text{CH}_2\text{Cl}_2$ );  $^1\text{H}$  NMR (400 MHz,  $\text{CDCl}_3$ )  $\delta$  7.89 (d,  $J = 8.2$  Hz, 2H), 7.65 (dd,  $J = 15.4, 7.8$  Hz, 4H), 7.55 (d,  $J = 10.3$  Hz, 1H), 7.48 (t,  $J = 7.5$  Hz, 4H), 7.40 (t,  $J = 7.3$  Hz, 1H), 7.34 (d,  $J = 8.1$  Hz, 2H), 6.36 (d,  $J = 10.4$  Hz, 1H), 6.26 (d,  $J = 2.9$  Hz, 1H), 5.46 (d,  $J = 2.5$  Hz, 1H), 3.45 (s, 1H), 2.71 (dd,  $J = 16.8, 2.9$  Hz, 1H), 2.65 (dd,  $J = 16.9, 5.2$  Hz, 1H), 2.46 (s, 3H);  $^{13}\text{C}$  NMR (101 MHz,  $\text{CDCl}_3$ )  $\delta$  194.58, 165.83, 145.75, 144.58, 141.77, 140.04, 138.46, 138.38, 135.54, 130.39, 129.44, 129.24, 128.96, 127.85, 127.64, 127.17, 126.30, 120.78, 69.84, 48.81, 35.15, 21.79; IR (neat):  $\nu$  3006, 2989, 2377, 2351, 2321, 1731, 1694, 1359, 1275, 1261, 1152, 763, 750  $\text{cm}^{-1}$ ; HRMS (ESI)  $m/z$  calcd for  $\text{C}_{28}\text{H}_{23}\text{NO}_4\text{S}$   $[\text{M}+\text{H}]^+ = 470.1426$ , found = 470.1414; Enantiomeric excess: 92%, determined by HPLC (Chiralpak OD-H, hexane/2-propanol = 80/20; flow rate 1.0 mL/min; 25°C;  $\lambda = 220$  nm) first peak:  $t_R = 32.4$  min, second peak:  $t_R = 36.7$  min.

**(3aR,7aR)-7a-methyl-3-methylene-1-tosyl-1,3a,4,7a-tetrahydro-2H-indole-2,5(3H)-dione**

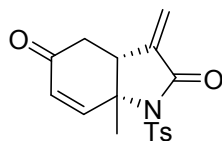

**(2l)** 77% yield; white solid; mp 161-163°C;  $[\alpha]_D^{28} = -65.1$  ( $c = 0.4$ ,  $\text{CH}_2\text{Cl}_2$ );  $^1\text{H NMR}$  (400 MHz,  $\text{CDCl}_3$ )  $\delta$  7.98 (d,  $J = 8.3$  Hz, 2H), 7.35 (d,  $J = 8.2$  Hz, 2H), 7.24 (d,  $J = 10.4$  Hz, 1H), 6.17 (d,  $J = 3.0$  Hz, 1H), 6.02 (d,  $J = 10.4$  Hz, 1H), 5.46 (d,  $J = 2.7$  Hz, 1H), 3.17 (s, 1H), 2.80 (dd,  $J = 16.9, 5.6$  Hz, 1H), 2.73 (dd,  $J = 16.9, 4.4$  Hz, 1H), 2.45 (s, 3H), 1.99 (s, 3H);  $^{13}\text{C NMR}$  (101 MHz,  $\text{CDCl}_3$ )  $\delta$  194.38, 165.40, 146.87, 145.52, 138.44, 135.94, 129.64, 128.63, 128.17, 120.83, 64.82, 45.26, 36.28, 25.19, 21.75; IR (neat):  $\nu$  3006, 2989, 2377, 2351, 2320, 1688, 1572, 1275, 1261, 763, 750  $\text{cm}^{-1}$ ; HRMS (ESI)  $m/z$  calcd for  $\text{C}_{17}\text{H}_{17}\text{NO}_4\text{S}$   $[\text{M}+\text{H}]^+ = 332.0956$ , found = 332.0990; Enantiomeric excess: 72%, determined by HPLC (Chiralpak AD-H, hexane/2-propanol = 95/5; flow rate 1.0 mL/min; 25°C;  $\lambda = 220$  nm) first peak:  $t_R = 61.0$  min, second peak:  $t_R = 66.2$  min.

**(3aR,7aR)-7a-ethyl-3-methylene-1-tosyl-1,3a,4,7a-tetrahydro-2H-indole-2,5(3H)-dione**

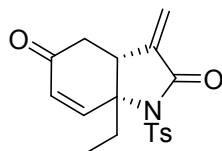

**(2m)** 66% yield; white solid; mp 72-74°C;  $[\alpha]_D^{28} = -60.1$  ( $c = 0.2$ ,  $\text{CH}_2\text{Cl}_2$ );  $^1\text{H NMR}$  (400 MHz,  $\text{CDCl}_3$ )  $\delta$  7.97 (d,  $J = 7.9$  Hz, 2H), 7.34 (d,  $J = 7.8$  Hz, 2H), 7.28 (d,  $J = 9.8$  Hz, 1H), 6.17 (s, 1H), 6.12 (d,  $J = 10.4$  Hz, 1H), 5.47 (s, 1H), 3.36 (s, 1H), 2.69 (dd,  $J = 16.7, 5.8$  Hz, 1H), 2.61 (dd,  $J = 16.7, 5.7$  Hz, 1H), 2.44 (s, 3H), 2.39 (d,  $J = 6.8$  Hz, 1H), 2.17 (td,  $J = 14.2, 6.9$  Hz, 1H), 1.09 (t,  $J = 7.2$  Hz, 3H);  $^{13}\text{C NMR}$  (101 MHz,  $\text{CDCl}_3$ )  $\delta$  194.91, 165.68, 146.51, 145.51, 139.08, 135.65, 129.51, 129.35, 128.96, 120.94, 68.22, 40.53, 37.97, 30.40, 21.74, 8.80; IR (neat):  $\nu$  2985, 2925, 2377, 2350, 2320, 1728, 1691, 1595, 1357, 1275, 1261, 1187, 1158, 1085, 1039, 909, 764, 750  $\text{cm}^{-1}$ ; HRMS (ESI)  $m/z$  calcd for  $\text{C}_{18}\text{H}_{19}\text{NO}_4\text{S}$   $[\text{M}+\text{H}]^+ = 346.1113$ , found = 346.1118; Enantiomeric excess: 84%, determined by HPLC (Chiralpak AD-H, hexane/2-propanol = 98/2; flow rate 1.0 mL/min; 25°C;  $\lambda = 220$  nm) first peak:  $t_R =$



115.6 min, second peak:  $t_R = 127.0$  min.

**(3aR,7aR)-3-methylene-1-tosyl-7a-vinyl-1,3a,4,7a-tetrahydro-2H-indole-2,5(3H)-dione**

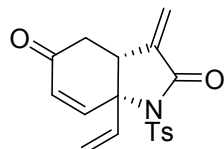

**(2n)** 87% yield; white solid; mp 157-159°C;  $[\alpha]^{28}_D = -101.0$  ( $c = 0.45$ ,  $\text{CH}_2\text{Cl}_2$ );  $^1\text{H}$  NMR (400 MHz,  $\text{CDCl}_3$ )  $\delta$  8.01 (d,  $J = 8.3$  Hz, 2H), 7.37 (d,  $J = 8.1$  Hz, 2H), 7.13 (dd,  $J = 10.4, 1.3$  Hz, 1H), 6.27 – 6.15 (m, 3H), 5.50 (d,  $J = 10.6$  Hz, 1H), 5.45 (d,  $J = 2.8$  Hz, 1H), 5.35 (d,  $J = 17.4$  Hz, 1H), 3.19 (s, 1H), 2.75 (d,  $J = 4.5$  Hz, 2H), 2.45 (s, 3H);  $^{13}\text{C}$  NMR (101 MHz,  $\text{CDCl}_3$ )  $\delta$  194.45, 165.17, 145.65, 143.67, 138.04, 136.83, 135.84, 130.43, 129.69, 128.80, 120.94, 117.32, 68.31, 44.09, 34.55, 21.77; IR (neat):  $\nu$  3007, 2989, 2377, 2350, 2320, 1732, 1695, 1275, 1261, 1172, 1086, 763, 750  $\text{cm}^{-1}$ ; HRMS (ESI)  $m/z$  calcd for  $\text{C}_{18}\text{H}_{17}\text{NO}_4\text{S}$   $[\text{M}+\text{H}]^+ = 344.0956$ , found = 344.0994; Enantiomeric excess: 85%, determined by HPLC (Chiralpak OD-H, hexane/2-propanol = 80/20; flow rate 1.0 mL/min; 25°C;  $\lambda = 220$  nm) first peak:  $t_R = 14.8$  min, second peak:  $t_R = 18.8$  min.

**(3aR,7aR)-3-methylene-1-tosyl-7a-((trimethylsilyl)ethynyl)-1,3a,4,7a-tetrahydro-2H-indole-2,5(3H)-dione**

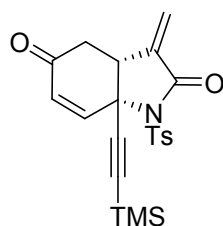

**(2o)** 42% yield; white solid; mp 102-105°C;  $[\alpha]^{28}_D = +19.6$  ( $c = 0.5$ ,  $\text{CH}_2\text{Cl}_2$ );  $^1\text{H}$  NMR (400 MHz,  $\text{CDCl}_3$ )  $\delta$  8.10 (d,  $J = 7.3$  Hz, 2H), 7.36 (d,  $J = 7.2$  Hz, 2H), 7.21 (d,  $J = 10.0$  Hz, 1H), 6.18 (s, 1H), 6.05 (d,  $J = 10.0$  Hz, 1H), 5.45 (s, 1H), 3.59 (s, 1H), 3.07 – 2.93 (m, 1H), 2.82 (d,  $J = 16.7$  Hz, 1H), 2.46 (s, 3H), 0.27 (s, 9H);  $^{13}\text{C}$  NMR (101 MHz,  $\text{CDCl}_3$ )  $\delta$  194.12, 164.52, 145.96, 143.70, 137.83, 136.01, 129.89, 129.14, 128.34, 121.34, 100.04, 94.17, 59.54, 46.85, 36.21, 22.13, 0.00; IR (neat):  $\nu$  3007, 2988, 2965, 2377, 2350, 2320, 1737, 1697, 1596, 1365, 1275, 1260, 1175, 1087, 1017,

920, 844, 763, 750  $\text{cm}^{-1}$ ; HRMS (ESI)  $m/z$  calcd for  $\text{C}_{18}\text{H}_{17}\text{NO}_4\text{S}$   $[\text{M}+\text{Na}]^+ = 436.1015$ , found = 436.1012; Enantiomeric excess: 88%, determined by HPLC (Chiralpak OD-H, hexane/2-propanol = 90/10; flow rate 1.0 mL/min; 25°C;  $\lambda = 220$  nm) first peak:  $t_R = 9.4$  min, second peak:  $t_R = 10.7$  min.

**(3aR,7aR)-7a-cyclopentyl-3-methylene-1-tosyl-1,3a,4,7a-tetrahydro-2H-indole-2,5(3H)-dione**

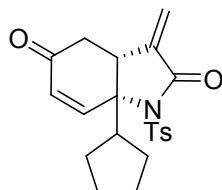

**(2p)** 88% yield; white solid; mp 127-130°C;  $[\alpha]_D^{28} = +24.0$  ( $c = 0.25$ ,  $\text{CH}_2\text{Cl}_2$ );  $^1\text{H}$  NMR (400 MHz,  $\text{CDCl}_3$ )  $\delta$  7.91 (d,  $J = 8.0$  Hz, 2H), 7.45 (d,  $J = 10.6$  Hz, 1H), 7.32 (d,  $J = 8.0$  Hz, 2H), 6.23 (d,  $J = 10.6$  Hz, 1H), 6.13 (s, 1H), 5.47 (s, 1H), 3.35 (t,  $J = 7.6$  Hz, 1H), 3.07 – 2.92 (m, 1H), 2.57 (dd,  $J = 16.3, 6.3$  Hz, 1H), 2.43 (s, 3H), 2.41 – 2.33 (m, 1H), 1.85 – 1.74 (m, 2H), 1.68 (d,  $J = 15.8$  Hz, 4H), 1.31 (dd,  $J = 23.4, 13.4$  Hz, 2H);  $^{13}\text{C}$  NMR (101 MHz,  $\text{CDCl}_3$ )  $\delta$  195.57, 165.36, 146.48, 145.40, 140.70, 135.56, 129.63, 129.47, 128.81, 120.45, 68.62, 49.16, 41.19, 38.87, 28.42, 27.52, 25.43, 25.03, 21.72; IR (neat):  $\nu$  3006, 2988, 2377, 2350, 2321, 1725, 1694, 1275, 1261, 1159, 763, 750  $\text{cm}^{-1}$ ; HRMS (ESI)  $m/z$  calcd for  $\text{C}_{21}\text{H}_{23}\text{NO}_4\text{S}$   $[\text{M}+\text{H}]^+ = 386.1426$ , found = 386.1424; Enantiomeric excess: 95%, determined by HPLC (Chiralpak IC, hexane/2-propanol = 80/20; flow rate 1.0 mL/min; 25°C;  $\lambda = 220$  nm) first peak:  $t_R = 72.5$  min, second peak:  $t_R = 95.0$  min.

**(3aR,7aR)-7a-cyclohexyl-3-methylene-1-tosyl-1,3a,4,7a-tetrahydro-2H-indole-2,5(3H)-dione**

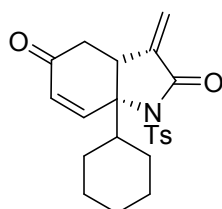

**(2q)** 87% yield; white solid; mp 169-171°C;  $[\alpha]_D^{28} = -9.2$  ( $c = 0.5$ ,  $\text{CH}_2\text{Cl}_2$ );  $^1\text{H}$  NMR (400 MHz,  $\text{CDCl}_3$ )  $\delta$  7.94 (d,  $J = 8.2$  Hz, 2H), 7.38 (d,  $J = 10.6$  Hz, 1H), 7.33 (d,  $J =$

8.0 Hz, 2H), 6.23 (d,  $J = 10.6$  Hz, 1H), 6.13 (d,  $J = 1.7$  Hz, 1H), 5.45 (s, 1H), 3.44 (t,  $J = 6.8$  Hz, 1H), 2.62 (dd,  $J = 16.5, 6.4$  Hz, 1H), 2.52 (dd,  $J = 21.8, 9.8$  Hz, 2H), 2.43 (s, 3H), 1.79 (dt,  $J = 26.5, 13.1$  Hz, 5H), 1.31 (dt,  $J = 20.7, 10.5$  Hz, 2H), 1.18 – 0.93 (m, 3H);  $^{13}\text{C}$  NMR (101 MHz,  $\text{CDCl}_3$ )  $\delta$  195.49, 165.67, 147.07, 145.45, 140.36, 135.50, 130.28, 129.41, 128.97, 120.49, 70.69, 45.80, 40.86, 37.82, 28.85, 27.17, 26.41, 26.13, 26.04, 21.71; IR (neat):  $\nu$  3006, 2989, 2378, 2350, 2320, 1722, 1690, 1573, 1275, 1261, 1157, 763, 750  $\text{cm}^{-1}$ ; HRMS (ESI)  $m/z$  calcd for  $\text{C}_{22}\text{H}_{25}\text{NO}_4\text{S}$   $[\text{M}+\text{H}]^+ = 400.1583$ , found = 400.1579; Enantiomeric excess: 97%, determined by HPLC (Chiralpak AD-H, hexane/2-propanol = 95/5; flow rate 1.0 mL/min; 25°C;  $\lambda = 220$  nm) first peak:  $t_R = 38.0$  min, second peak:  $t_R = 42.1$  min, third peak:  $t_R = 46.4$  min, fourth peak:  $t_R = 56.6$  min.

**(3aR,7aR)-7a-(4-bromophenyl)-3-methylene-1-(phenylsulfonyl)-1,3a,4,7a-tetrahydro-2H-indole-2,5(3H)-dione**

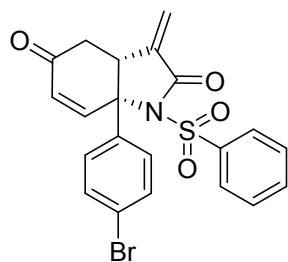

**(2r)** 79% yield; white solid; mp 93-96°C;  $[\alpha]_D^{28} = -64.1$  ( $c = 0.5$ ,  $\text{CH}_2\text{Cl}_2$ );  $^1\text{H}$  NMR (400 MHz,  $\text{CDCl}_3$ )  $\delta$  7.98 (d,  $J = 6.7$  Hz, 2H), 7.68 (d,  $J = 6.0$  Hz, 1H), 7.58 (s, 4H), 7.47 (d,  $J = 9.9$  Hz, 1H), 7.34 – 7.26 (m, 2H), 6.35 (d,  $J = 10.2$  Hz, 1H), 6.26 (s, 1H), 5.47 (s, 1H), 3.37 (s, 1H), 2.71 (d,  $J = 16.2$  Hz, 1H), 2.59 (d,  $J = 16.5$  Hz, 1H);  $^{13}\text{C}$  NMR (101 MHz,  $\text{CDCl}_3$ )  $\delta$  194.10, 165.61, 143.81, 138.69, 138.33, 137.93, 134.60, 132.21, 130.70, 129.09, 128.91, 127.56, 123.13, 121.24, 69.49, 48.69, 34.96; IR (neat):  $\nu$  3007, 2989, 2378, 2350, 2320, 1732, 1695, 1275, 1261, 763, 750  $\text{cm}^{-1}$ ; HRMS (ESI)  $m/z$  calcd for  $\text{C}_{21}\text{H}_{16}\text{BrNO}_4\text{S}$   $[\text{M}+\text{H}]^+ = 458.0062$ , found = 458.0058; Enantiomeric excess: 91%, determined by HPLC (Chiralpak OD-H, hexane/2-propanol = 80/20; flow rate 1.0 mL/min; 25°C;  $\lambda = 220$  nm) first peak:  $t_R = 22.9$  min, second peak:  $t_R = 45.7$  min.

**(3aR,7aR)-1-((4-bromophenyl)sulfonyl)-3-methylene-7a-phenyl-1,3a,4,7a-tetrahydro-2H-indole-2,5(3H)-dione**

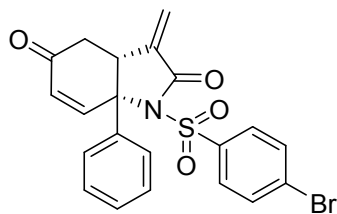

**(2s)** 51% yield; white solid; mp 147-149°C;  $[\alpha]_{\text{D}}^{28} = -100.1$  ( $c = 0.25$ ,  $\text{CH}_2\text{Cl}_2$ );  $^1\text{H}$  NMR (400 MHz,  $\text{CDCl}_3$ )  $\delta$  7.81 (d,  $J = 8.2$  Hz, 2H), 7.68 (d,  $J = 8.2$  Hz, 2H), 7.53 – 7.43 (m, 4H), 7.39 (s, 2H), 6.34 (d,  $J = 10.4$  Hz, 1H), 6.27 (s, 1H), 5.49 (s, 1H), 3.44 (s, 1H), 2.71 (d,  $J = 16.3$  Hz, 1H), 2.60 (dd,  $J = 16.7, 4.9$  Hz, 1H);  $^{13}\text{C}$  NMR (101 MHz,  $\text{CDCl}_3$ )  $\delta$  194.36, 165.82, 144.30, 139.22, 138.10, 137.39, 132.12, 130.63, 130.50, 129.99, 129.06, 128.15, 125.86, 121.18, 70.15, 48.80, 35.01; IR (neat):  $\nu$  3006, 2989, 2378, 2350, 2320, 1731, 1694, 1572, 1275, 1261, 1150, 1067, 763, 750  $\text{cm}^{-1}$ ; HRMS (ESI)  $m/z$  calcd for  $\text{C}_{21}\text{H}_{16}\text{BrNO}_4\text{S}$   $[\text{M}+\text{H}]^+ = 458.0062$ , found = 458.0066; Enantiomeric excess: 95%, determined by HPLC (Chiralpak AD-H, hexane/2-propanol = 80/20; flow rate 1.0 mL/min; 25°C;  $\lambda = 220$  nm) first peak:  $t_{\text{R}} = 17.3$  min, second peak:  $t_{\text{R}} = 33.5$  min.

**(3aR,7aR)-3-methylene-7a-phenyl-1-((4-(trifluoromethyl)phenyl)sulfonyl)-1,3a,4,7a-tetrahydro-2H-indole-2,5(3H)-dione**

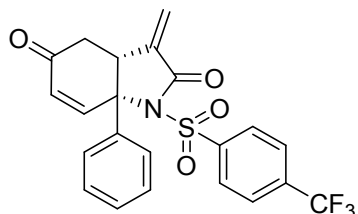

**(2t)** 76% yield; white solid; mp 83-85°C;  $[\alpha]_{\text{D}}^{28} = -54.1$  ( $c = 0.4$ ,  $\text{CH}_2\text{Cl}_2$ );  $^1\text{H}$  NMR (400 MHz,  $\text{CDCl}_3$ )  $\delta$  8.09 (d,  $J = 7.6$  Hz, 2H), 7.81 (d,  $J = 7.6$  Hz, 2H), 7.49 (d,  $J = 17.8$  Hz, 4H), 7.40 (s, 2H), 6.36 (d,  $J = 10.3$  Hz, 1H), 6.28 (s, 1H), 5.51 (s, 1H), 3.47 (s, 1H), 2.72 (d,  $J = 16.7$  Hz, 1H), 2.66 – 2.56 (m, 1H);  $^{13}\text{C}$  NMR (101 MHz,  $\text{CDCl}_3$ )  $\delta$  194.22, 165.83, 144.14, 141.80, 139.08, 137.94, 136.06, 135.73, 130.63, 129.73, 129.15 (d,  $J = 7.9$  Hz), 125.94 (d,  $J = 3.7$  Hz), 125.89, 124.40, 121.47, 70.27, 48.81, 35.01; IR (neat):  $\nu$  3006, 2989, 2378, 2350, 2320, 1731, 1694, 1572, 1275, 1261, 1150, 1067, 763, 750  $\text{cm}^{-1}$ ; HRMS (ESI)  $m/z$  calcd for  $\text{C}_{22}\text{H}_{16}\text{F}_3\text{NO}_4\text{S}$   $[\text{M}+\text{H}]^+ = 448.0830$ , found = 448.0838; Enantiomeric excess: 86%, determined by HPLC

(Chiralpak OD-H, hexane/2-propanol = 80/20; flow rate 1.0 mL/min; 25°C;  $\lambda$  = 220 nm) first peak:  $t_R$  = 12.0 min, second peak:  $t_R$  = 17.3 min.

**(3aR,7aS)-6-chloro-3-methylene-7a-phenyl-1-tosyl-1,3a,4,7a-tetrahydro-2H-indole-2,5(3H)-dione**

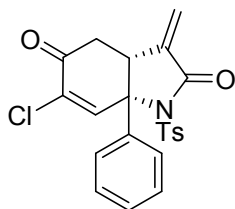

**(2u)** 33% yield; white solid; mp 223-225°C;  $[\alpha]_D^{28} = -27.4$  ( $c = 0.3$ ,  $\text{CH}_2\text{Cl}_2$ );  $^1\text{H}$  NMR (400 MHz,  $\text{CDCl}_3$ )  $\delta$  7.83 (d,  $J = 7.9$  Hz, 2H), 7.74 (s, 1H), 7.46 (s, 3H), 7.40 (s, 2H), 7.34 (d,  $J = 7.7$  Hz, 2H), 6.27 (s, 1H), 5.47 (s, 1H), 3.44 (s, 1H), 2.88 (d,  $J = 15.0$  Hz, 1H), 2.71 (dd,  $J = 16.7, 5.0$  Hz, 1H), 2.46 (s, 3H);  $^{13}\text{C}$  NMR (101 MHz,  $\text{CDCl}_3$ )  $\delta$  187.07, 165.46, 145.93, 140.96, 139.13, 137.67, 135.31, 134.22, 129.48, 129.17, 125.71, 121.30, 71.09, 48.56, 35.29, 21.79; IR (neat):  $\nu$  3006, 2989, 2370, 2350, 2320, 1732, 1710, 1364, 1275, 1261, 1188, 1158, 1085, 763, 750  $\text{cm}^{-1}$ ; HRMS (ESI)  $m/z$  calcd for  $\text{C}_{22}\text{H}_{18}\text{ClNO}_4\text{S}$   $[\text{M}+\text{H}]^+ = 428.0723$ , found = 428.0769; Enantiomeric excess: 96%, determined by HPLC (Chiralpak OD-H, hexane/2-propanol = 80/20; flow rate 1.0 mL/min; 25°C;  $\lambda$  = 220 nm) first peak:  $t_R$  = 20.9 min, second peak:  $t_R$  = 23.4 min.

**(3aR,7aR)-7-methoxy-3-methylene-7a-phenyl-1-tosyl-1,3a,4,7a-tetrahydro-2H-indole-2,5(3H)-dione**

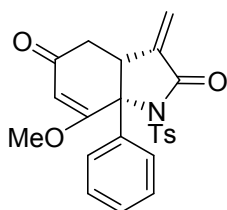

**(2u)** 47% yield; white solid; mp 215-217°C;  $[\alpha]_D^{28} = -82.5$  ( $c = 0.5$ ,  $\text{CH}_2\text{Cl}_2$ );  $^1\text{H}$  NMR (400 MHz,  $\text{CDCl}_3$ )  $\delta$  8.01 (d,  $J = 8.3$  Hz, 2H), 7.47 (s, 4H), 7.34 (d,  $J = 8.2$  Hz, 3H), 6.20 (d,  $J = 3.2$  Hz, 1H), 5.64 (s, 1H), 5.43 (d,  $J = 2.9$  Hz, 1H), 3.87 (s, 3H), 3.47 (dd,  $J = 5.1, 2.5$  Hz, 1H), 2.65 (dd,  $J = 17.2, 1.9$  Hz, 1H), 2.45 (s, 3H), 2.41 (dd,  $J = 13.3, 4.0$  Hz, 1H);  $^{13}\text{C}$  NMR (101 MHz,  $\text{CDCl}_3$ )  $\delta$  194.24, 170.50, 165.95, 145.22, 137.93, 137.03, 136.34, 129.89, 129.08, 128.72, 128.07, 126.54, 119.61, 104.87,

73.29, 56.46, 50.33, 33.51, 21.71; IR (neat):  $\nu$  3007, 2989, 2370, 2350, 2320, 1732, 1671, 1608, 1454, 1364, 1275, 1261, 1226, 1169, 763, 750  $\text{cm}^{-1}$ ; HRMS (ESI)  $m/z$  calcd for  $\text{C}_{23}\text{H}_{21}\text{NO}_5\text{S}$   $[\text{M}+\text{H}]^+ = 424.1219$ , found = 424.1211; Enantiomeric excess: 73%, determined by HPLC (Chiralpak OD-H, hexane/2-propanol = 80/20; flow rate 1.0 mL/min; 25°C;  $\lambda = 220$  nm) first peak:  $t_R = 21.8$  min, second peak:  $t_R = 27.3$  min.

**(3aR,6aR)-3-methylene-1-tosyltetrahydrocyclopenta[b]pyrrole-2,5(1H,3H)-dione**

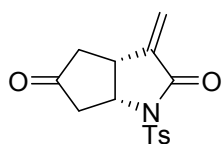

**(2w)** 49% yield; white solid; mp 94-96°C;  $[\alpha]_D^{28} = -10.3$  ( $c = 0.35$ ,  $\text{CH}_2\text{Cl}_2$ );  $^1\text{H}$  NMR (400 MHz,  $\text{CDCl}_3$ )  $\delta$  7.98 (d,  $J = 7.4$  Hz, 2H), 7.36 (d,  $J = 7.4$  Hz, 2H), 6.27 (s, 1H), 5.56 (s, 1H), 4.96 (dd,  $J = 14.2, 6.5$  Hz, 1H), 3.71 (s, 1H), 2.97 (dd,  $J = 19.3, 8.1$  Hz, 1H), 2.79 (dd,  $J = 19.3, 10.0$  Hz, 1H), 2.45 (s, 5H);  $^{13}\text{C}$  NMR (101 MHz,  $\text{CDCl}_3$ )  $\delta$  212.99, 165.10, 145.78, 141.24, 135.12, 129.83, 128.53, 122.94, 57.06, 44.46, 42.98, 37.41, 21.74; IR (neat):  $\nu$  3006, 2958, 2923, 2851, 2370, 2350, 2320, 1728, 1657, 1595, 1358, 1275, 1261, 1226, 1169, 1088, 1038, 763, 750  $\text{cm}^{-1}$ ; HRMS (ESI)  $m/z$  calcd for  $\text{C}_{15}\text{H}_{15}\text{NO}_4\text{S}$   $[\text{M}+\text{H}]^+ = 306.0800$ , found = 306.0896; Enantiomeric excess: 91%, determined by HPLC (Chiralpak OD-H, hexane/2-propanol = 80/20; flow rate 1.0 mL/min; 25°C;  $\lambda = 220$  nm) first peak:  $t_R = 75.4$  min, second peak:  $t_R = 83.3$  min.

**Dimethyl-2-(((3R,3aR,7aR)-2,5-dioxo-7a-phenyl-1-tosyl-2,3,3a,4,5,7a-hexahydro-1H-indol-3-yl)methyl)malonate**

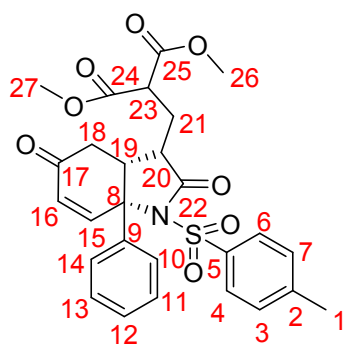

**(4a)** 82% yield; white solid; mp 115-117°C;  $[\alpha]_D^{25} = -52.0$  ( $c = 0.5$ ,  $\text{CH}_2\text{Cl}_2$ );  $^1\text{H}$

NMR (400 MHz, CDCl<sub>3</sub>)  $\delta$  7.73 (d,  $J$  = 8.0 Hz, 2H), 7.56 (d,  $J$  = 10.4 Hz, 1H), 7.42 (s, 3H), 7.37 – 7.28 (m, 4H), 6.43 (d,  $J$  = 10.4 Hz, 1H), 3.95 (t,  $J$  = 7.3 Hz, 1H), 3.70 (d,  $J$  = 2.6 Hz, 6H), 2.62 – 2.48 (m, 3H), 2.46 (s, 3H), 2.42 (d,  $J$  = 5.9 Hz, 1H), 2.17 – 2.07 (m, 2H). <sup>13</sup>C NMR (101 MHz, CDCl<sub>3</sub>)  $\delta$  194.49 (C=O, C17), 173.95 (C=O, C22), 169.17 (C=O, C24, C25), 168.88 (C, Ar), 145.65 (C, Ar), 144.43 (CH, C15), 139.22 (C, Ar), 135.48 (C, C16), 130.79 (CH, Ar), 129.34 (CH, Ar), 129.25 (CH, Ar), 128.91 (CH, Ar), 126.05 (CH, Ar), 69.67 (C8), 52.90 (CH<sub>3</sub>, C26), 52.81 (CH<sub>3</sub>, C27), 49.61 (CH, C23), 48.53 (CH, C19), 42.21 (CH, C20), 34.65 (CH<sub>2</sub>, C18), 27.08 (CH<sub>2</sub>, C21), 21.77 (CH<sub>3</sub>, C1); IR (neat):  $\nu$  2961, 2924, 2853, 2360, 2340, 2271, 1749, 1717, 1684, 1558, 1261, 1155, 1074, 871, 805, 764 cm<sup>-1</sup>; HRMS (ESI)  $m/z$  calcd for C<sub>27</sub>H<sub>27</sub>NO<sub>8</sub>S [M+H]<sup>+</sup> = 526.1536, found = 526.1544; Enantiomeric excess: 93%, determined by HPLC (Chiralpak OD-H, hexane/2-propanol = 80/20; flow rate 1.0 mL/min; 25°C;  $\lambda$  = 220 nm) first peak:  $t_R$  = 20.4 min, second peak:  $t_R$  = 48.5 min.

**Benzyl-(1R,3a'R,7a'R)-2',5'-dioxo-7a'-phenyl-1'-tosyl-1',2',3a',4',5',7a'-hexahydrospiro[cyclopentane-1,3'-indol]-3-ene-3-carboxylate**

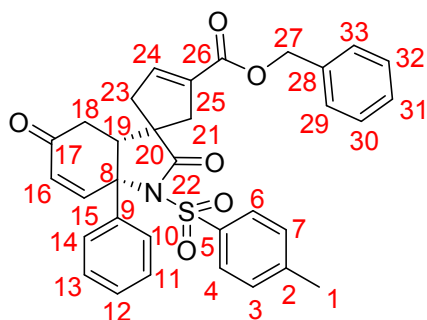

(**4b**) 95% yield; white solid; mp > 230°C; [ $\alpha$ ]<sub>D</sub><sup>25</sup> = -77.7 ( $c$  = 0.5, CH<sub>2</sub>Cl<sub>2</sub>); <sup>1</sup>H NMR (400 MHz, CDCl<sub>3</sub>)  $\delta$  7.77 (d,  $J$  = 7.8 Hz, 2H), 7.66 (d,  $J$  = 10.3 Hz, 1H), 7.41 (d,  $J$  = 2.7 Hz, 5H), 7.37 – 7.27 (m, 7H), 6.66 (s, 1H), 6.51 (d,  $J$  = 10.4 Hz, 1H), 5.12 (q,  $J$  = 12.4 Hz, 2H), 3.01 (d,  $J$  = 18.6 Hz, 1H), 2.85 (s, 1H), 2.58 (s, 2H), 2.50 (d,  $J$  = 6.3 Hz, 1H), 2.44 (s, 3H), 2.41 (s, 1H), 2.33 (d,  $J$  = 19.3 Hz, 1H). <sup>13</sup>C NMR (101 MHz, CDCl<sub>3</sub>)  $\delta$  194.82 (C=O, C17), 176.76 (C=O, C22), 163.28 (C=O, C26), 145.70 (C25), 145.54 (CH, C24), 140.66 (CH, C15), 140.55 (C, Ar), 135.77 (C, Ar), 135.13 (C, Ar), 133.74 (C, Ar), 131.08 (CH, C16), 129.43 (CH, Ar), 129.15 (CH, Ar), 129.01 (CH, Ar), 128.78 (CH, Ar), 128.55 (CH, Ar), 128.24 (CH, Ar), 128.21 (CH, Ar), 125.83 (CH, Ar), 68.86 (C8), 66.34 (CH<sub>2</sub>, C27), 53.05 (C20), 52.86 (CH, C19), 42.92 (CH<sub>2</sub>, C21),

37.70 (CH<sub>2</sub>, C23), 33.40 (CH<sub>2</sub>, C18), 21.76 (CH<sub>3</sub>, C1); IR (neat):  $\nu$  2961, 2924, 2853, 2360, 2340, 2271, 1761, 1699, 1647, 1576, 1075, 860, 804 cm<sup>-1</sup>; HRMS (ESI) m/z calcd for C<sub>33</sub>H<sub>29</sub>NO<sub>6</sub>S [M+H]<sup>+</sup> = 568.1794, found = 568.1792; Enantiomeric excess: 94%, determined by HPLC (Chiralpak AD-H, hexane/2-propanol = 80/20; flow rate 1.0 mL/min; 25°C;  $\lambda$  = 220 nm) first peak:  $t_R$  = 49.1 min, second peak:  $t_R$  = 93.2 min.



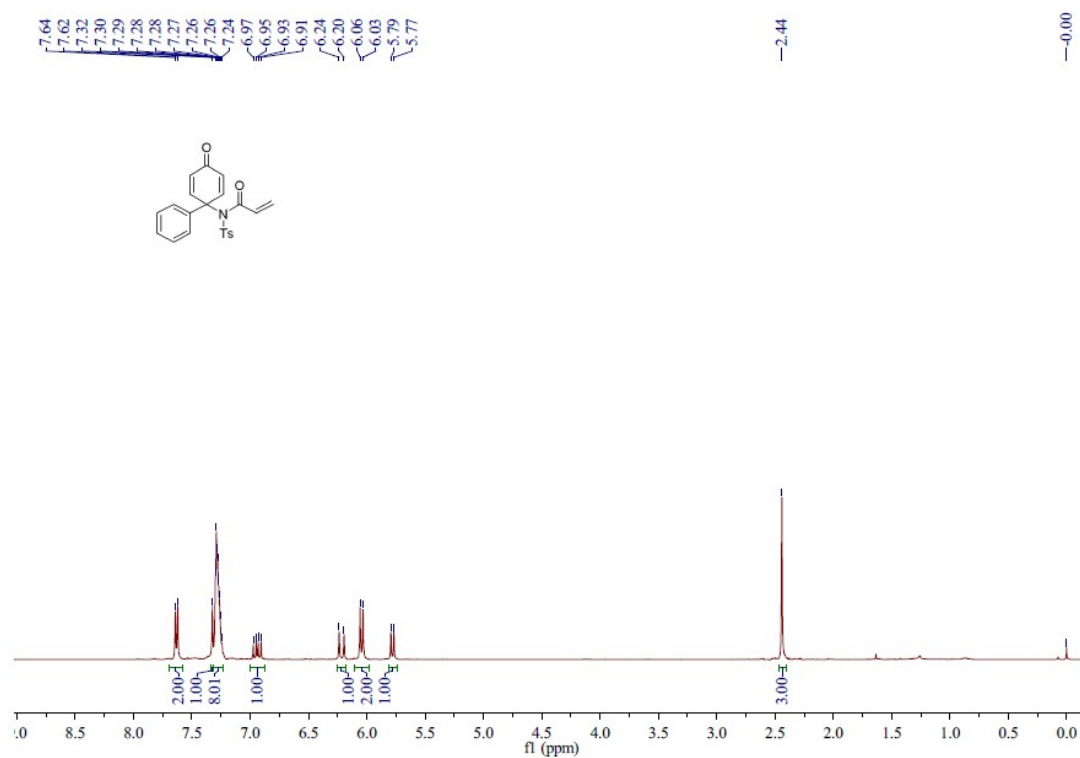

<sup>1</sup>H NMR spectra of **1a**

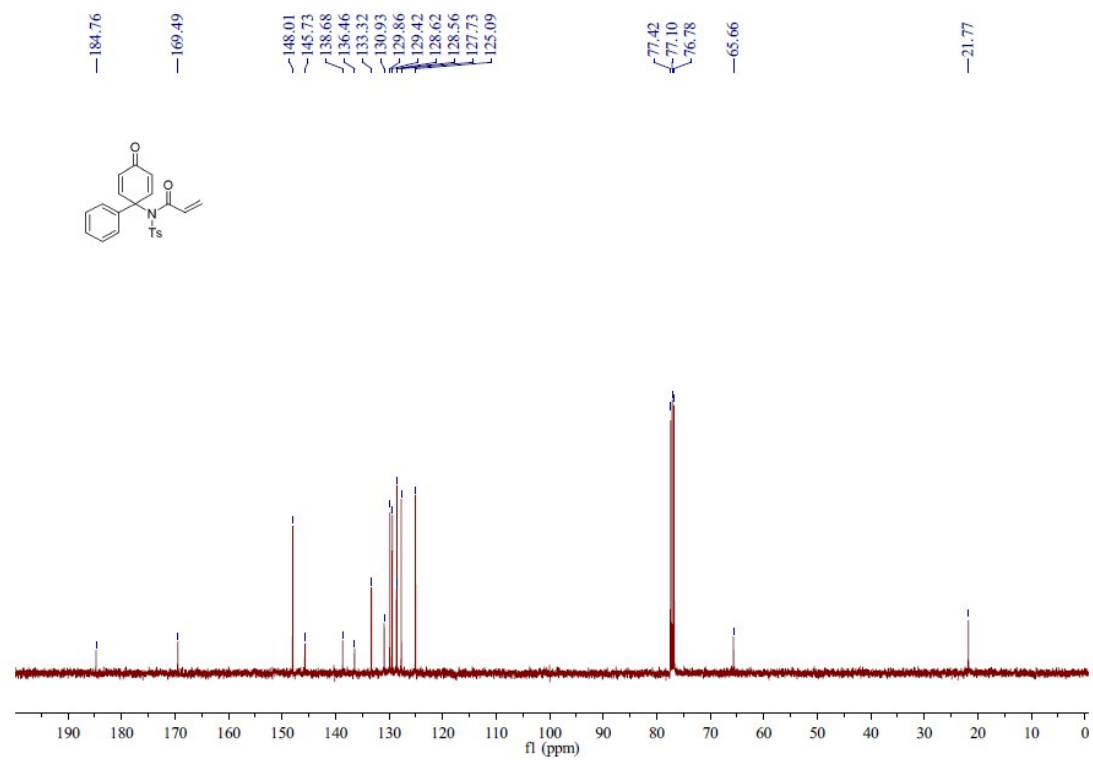

<sup>13</sup>C NMR spectra of **1a**

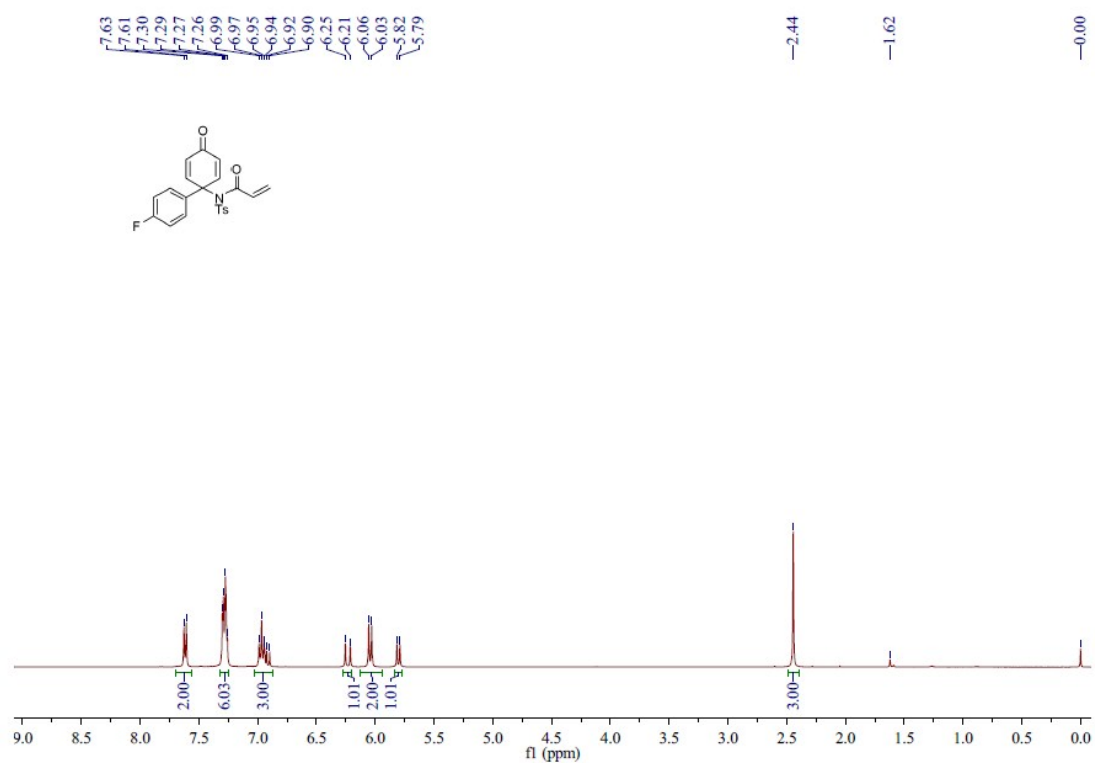

<sup>1</sup>H NMR spectra of **1b**

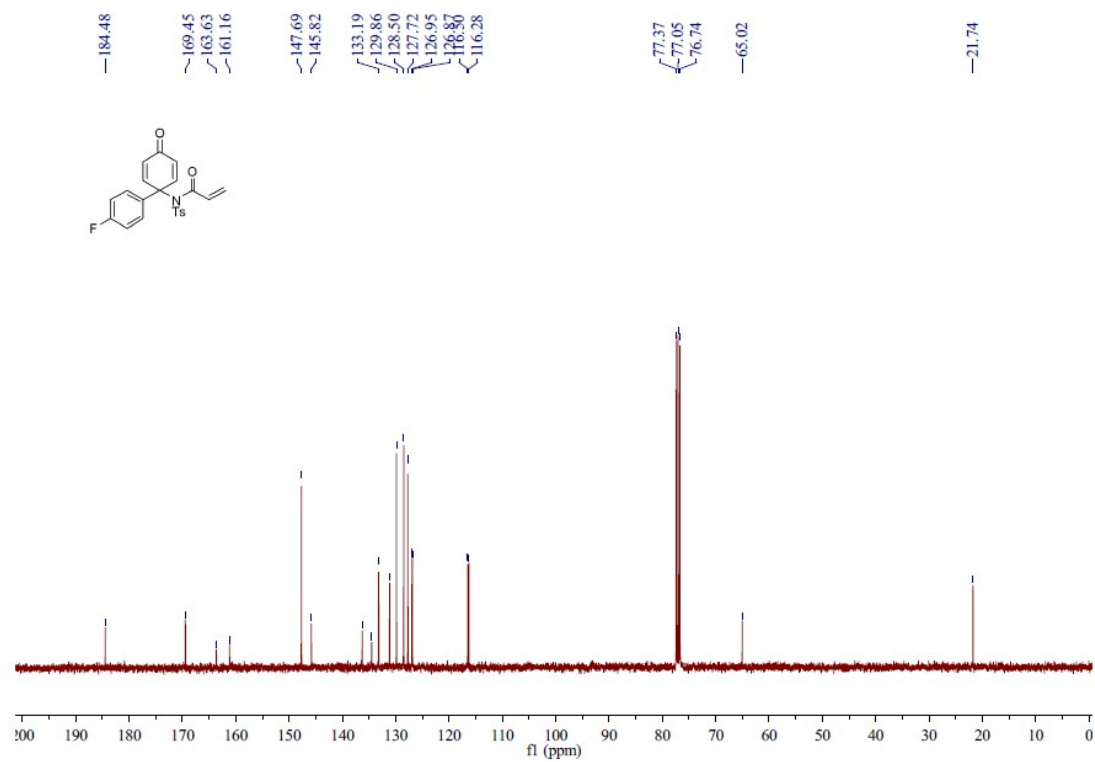

<sup>13</sup>C NMR spectra of **1b**

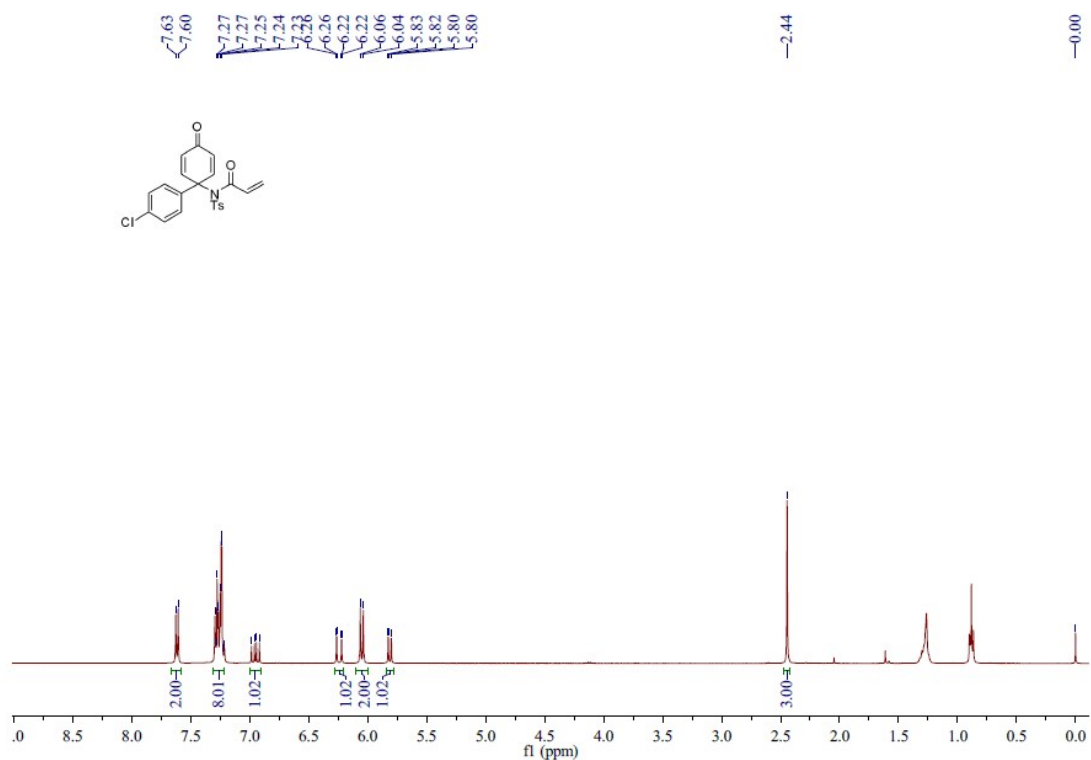

<sup>1</sup>H NMR spectra of **1c**

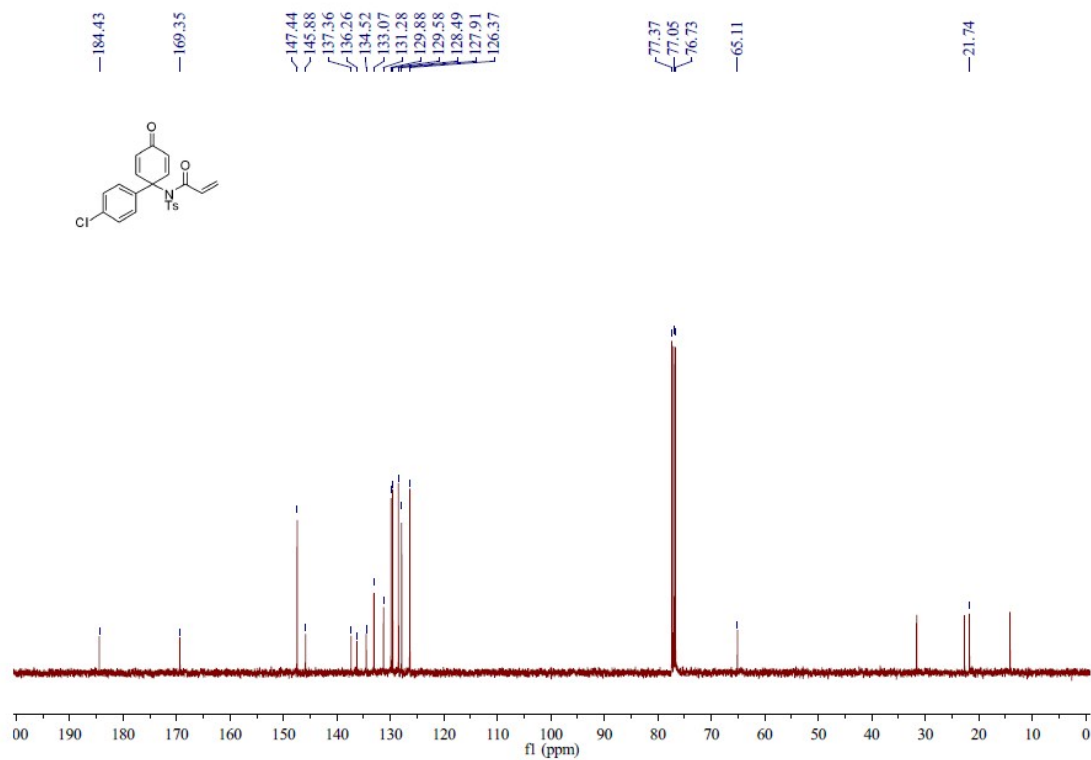

<sup>13</sup>C NMR spectra of **1c**

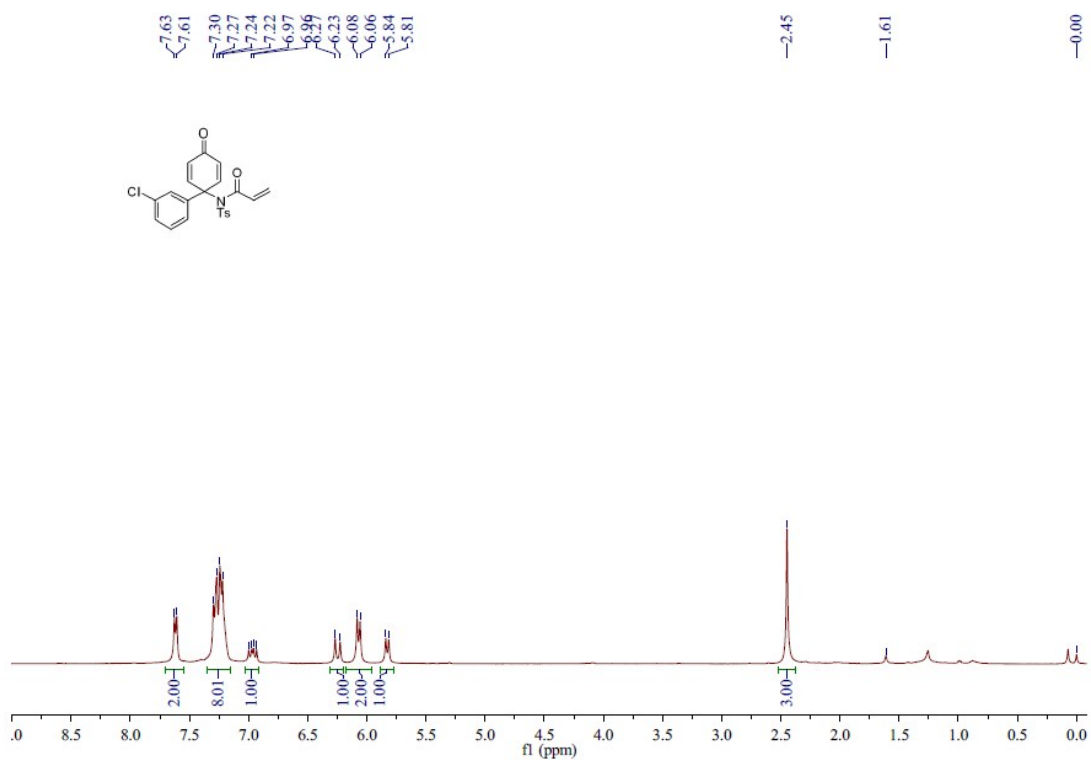

<sup>1</sup>H NMR spectra of **1d**

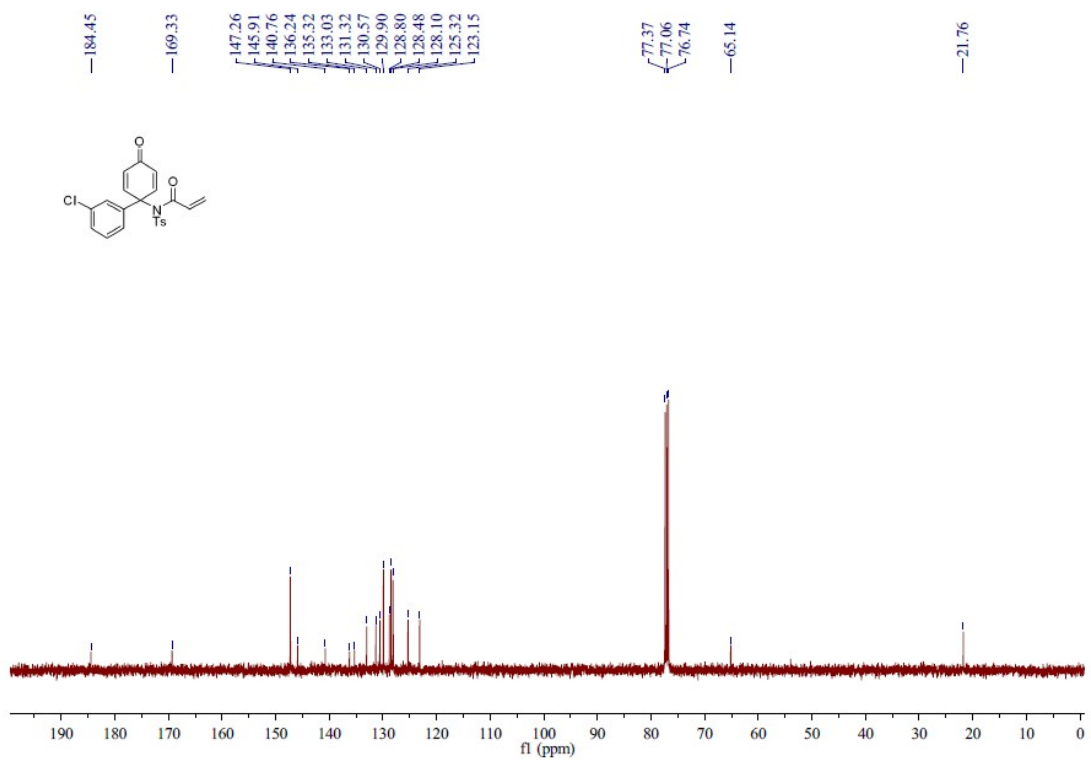

<sup>13</sup>C NMR spectra of **1d**

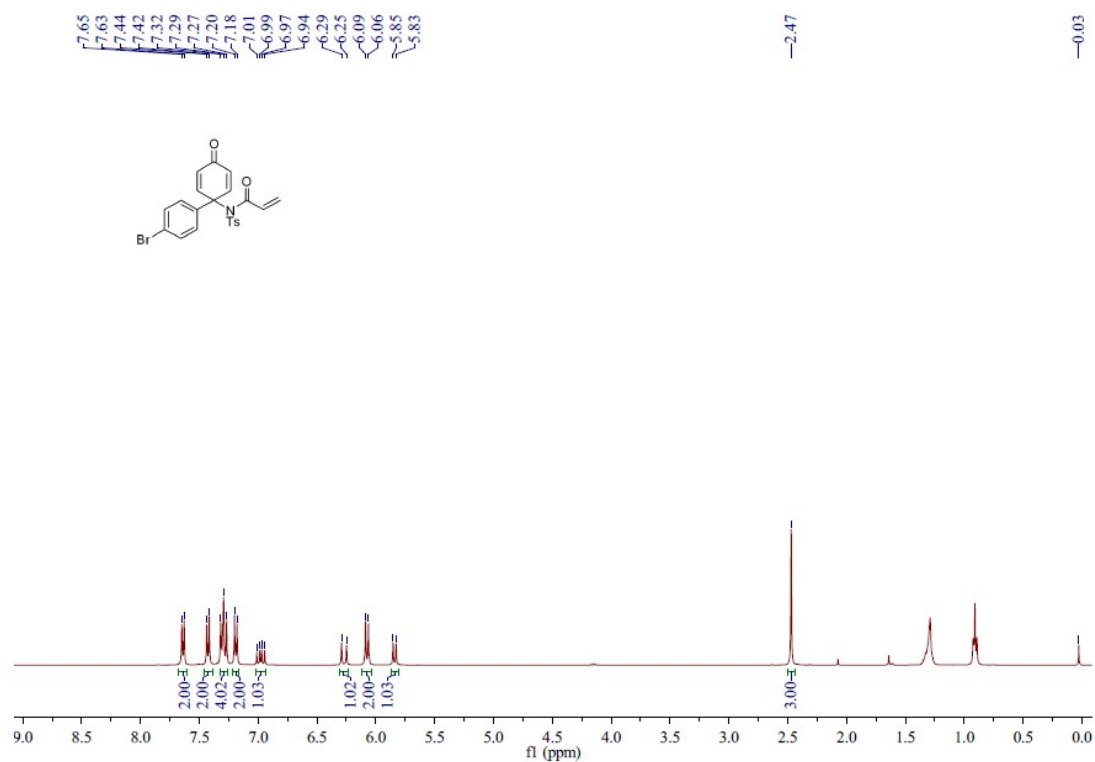

<sup>1</sup>H NMR spectra of **1e**

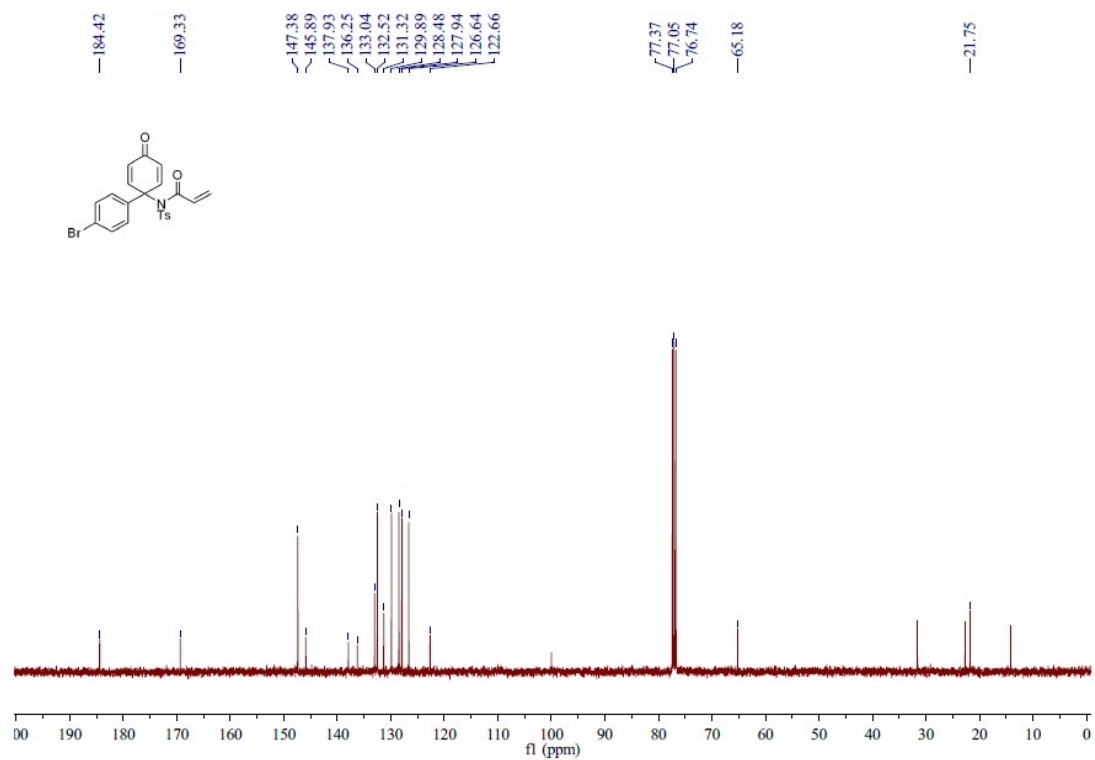

<sup>13</sup>C NMR spectra of **1e**

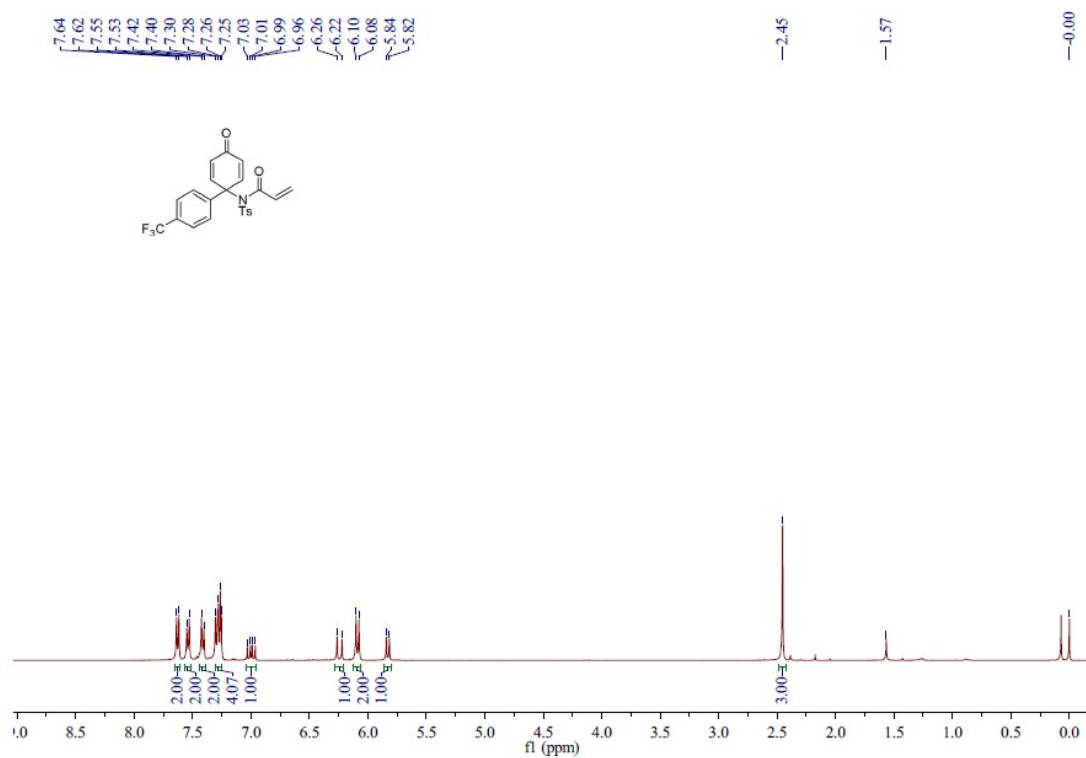

<sup>1</sup>H NMR spectra of **1f**

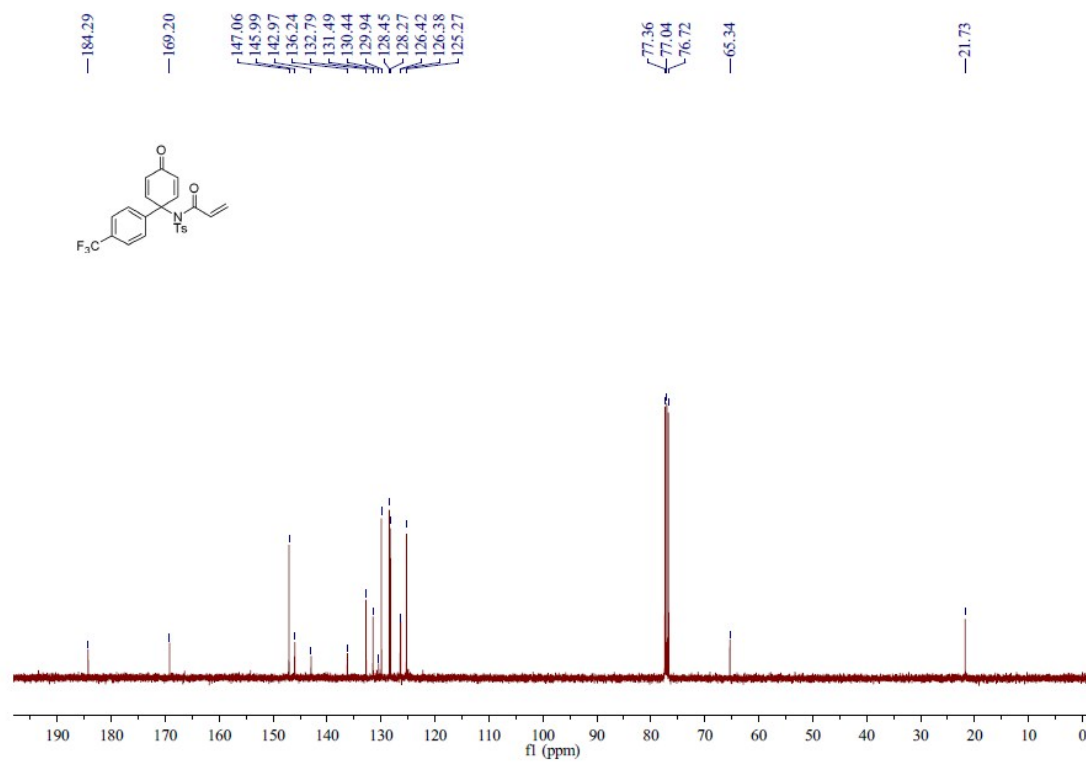

<sup>13</sup>C NMR spectra of **1f**

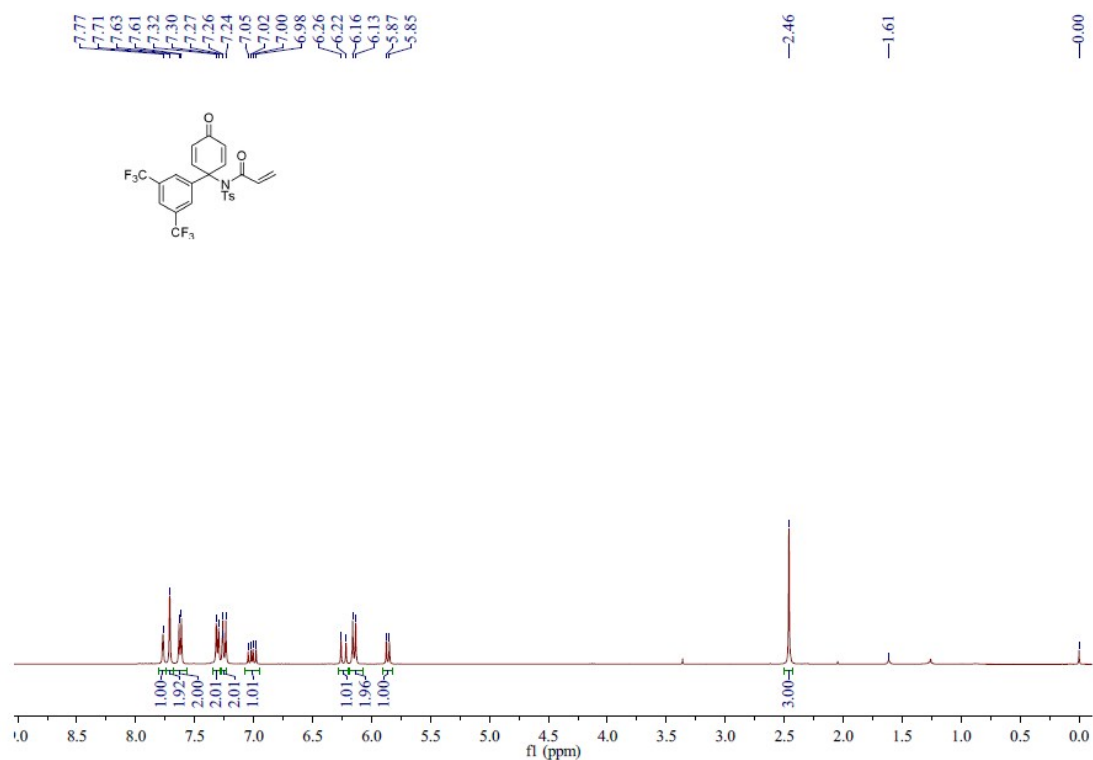

<sup>1</sup>H NMR spectra of **1g**

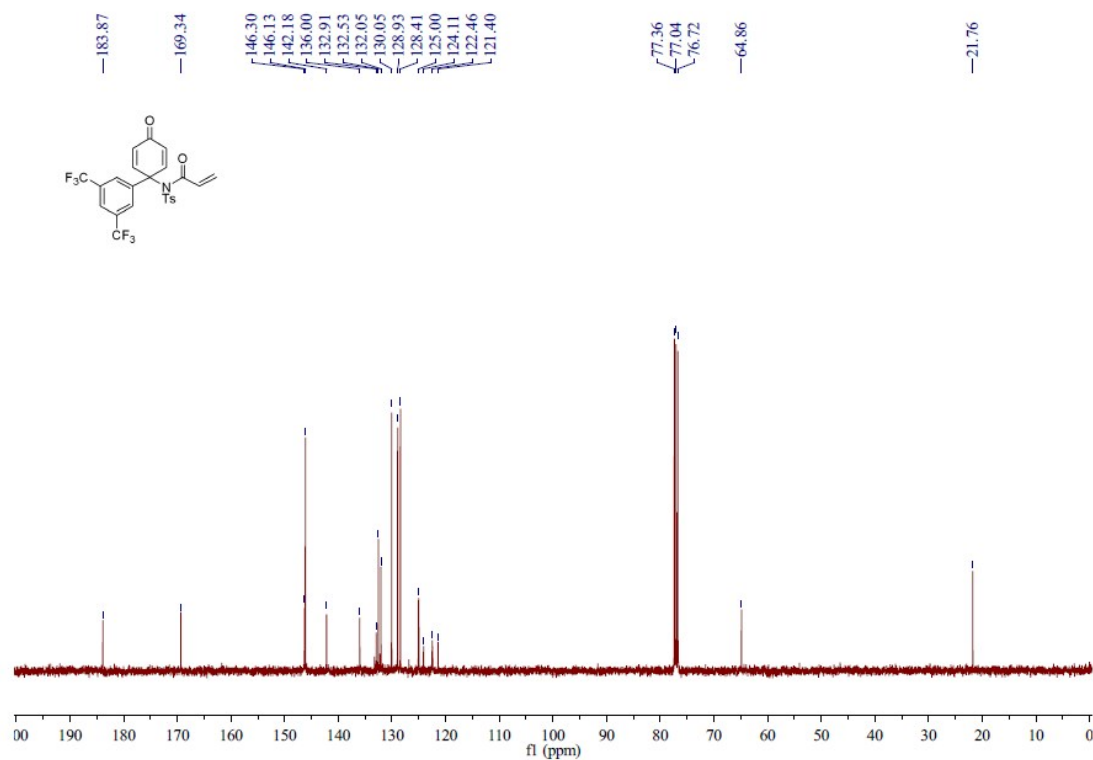

<sup>13</sup>C NMR spectra of **1g**

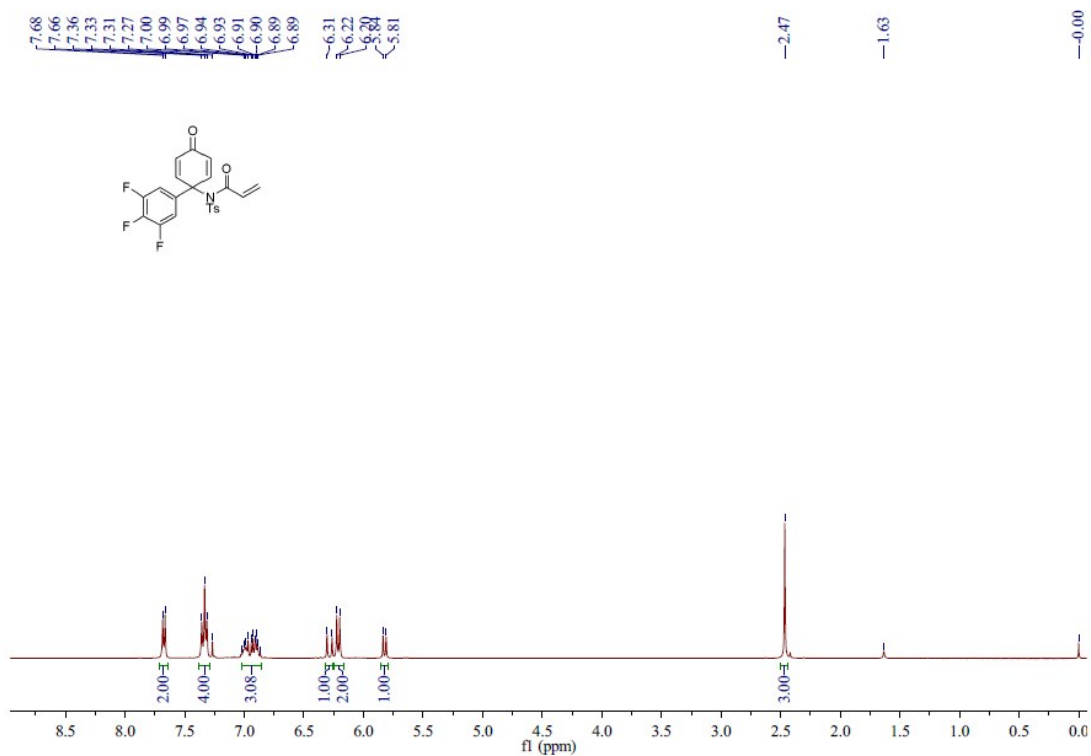

<sup>1</sup>H NMR spectra of **1h**

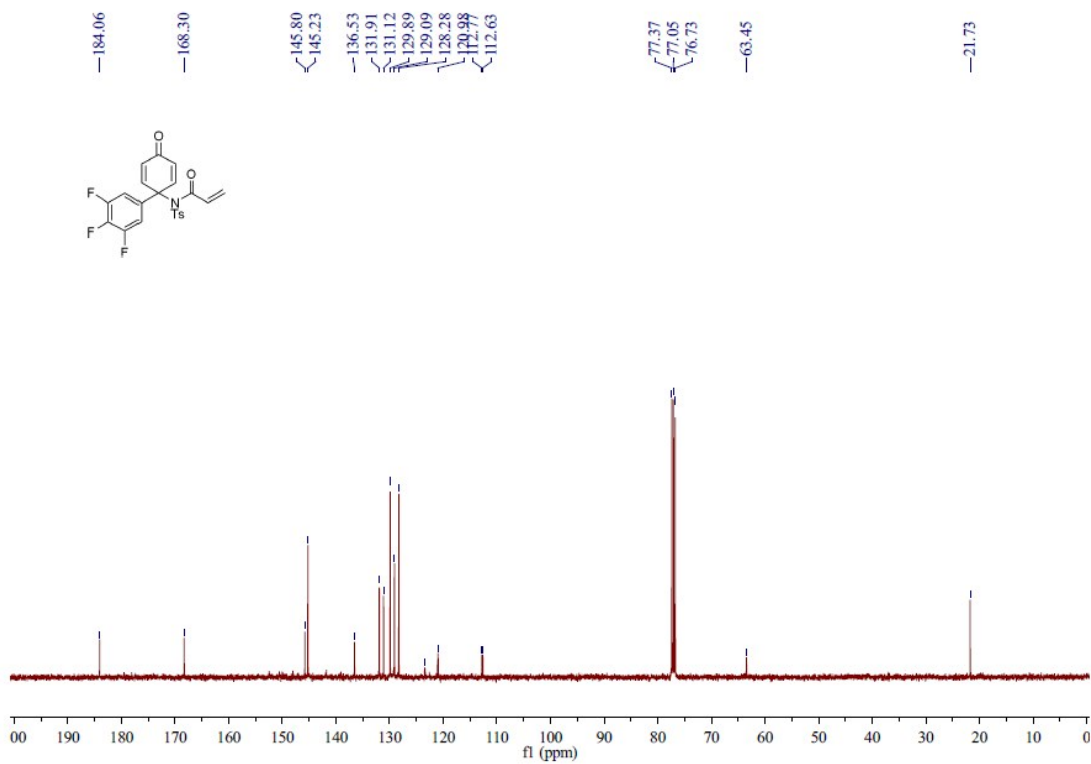

<sup>13</sup>C NMR spectra of **1h**



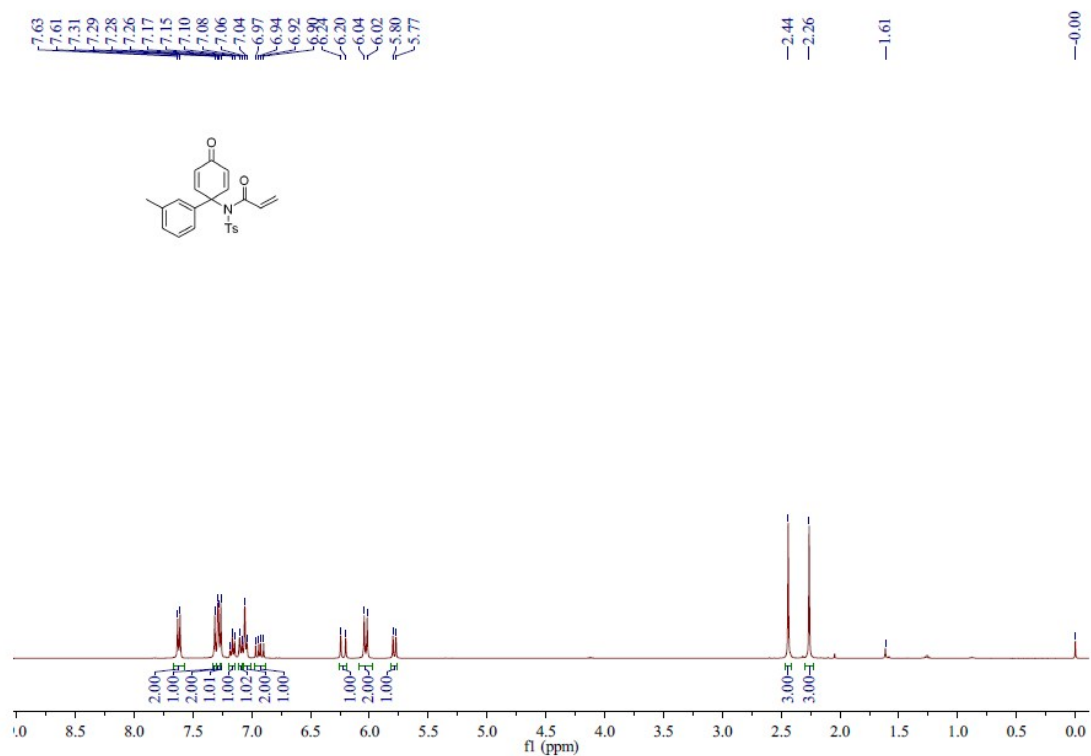

<sup>1</sup>H NMR spectra of **1i**

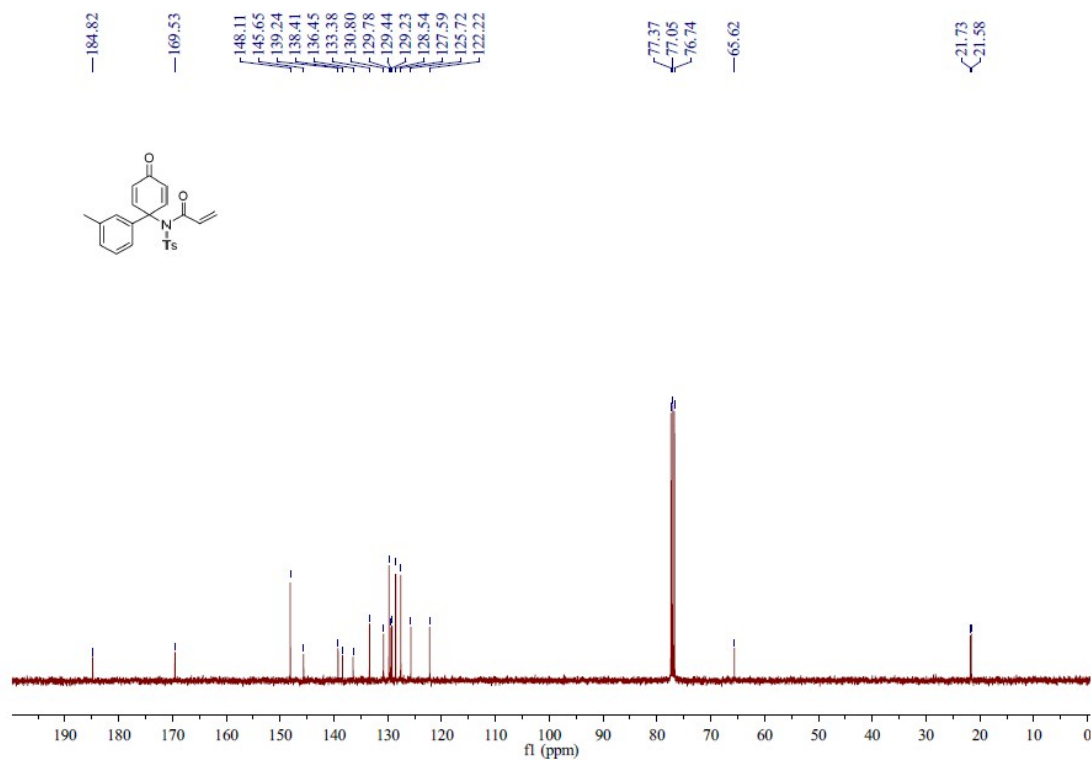

<sup>13</sup>C NMR spectra of **1i**

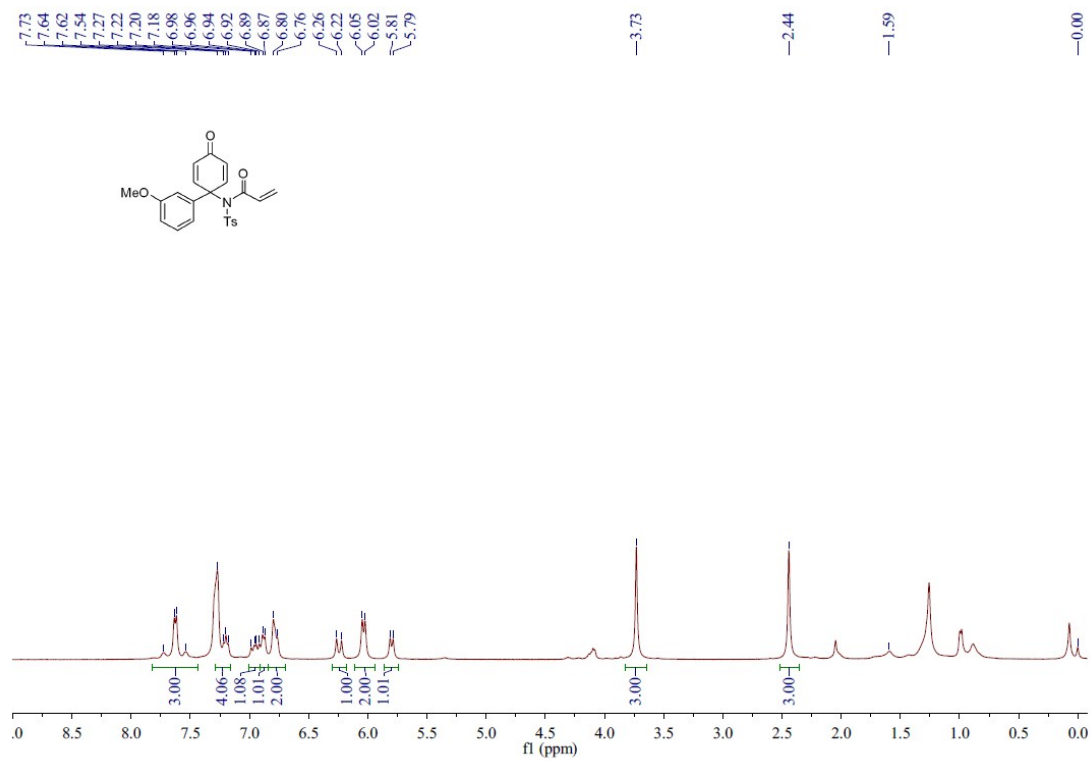

$^1\text{H}$  NMR spectra of **1j**

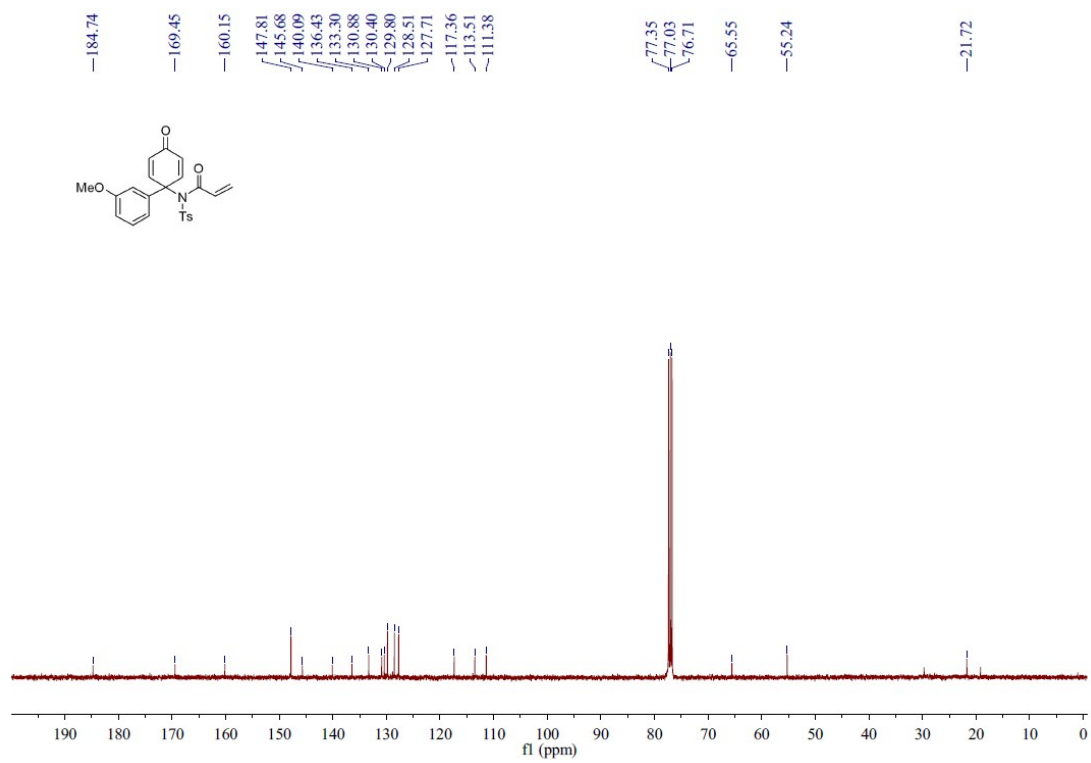

$^{13}\text{C}$  NMR spectra of **1j**

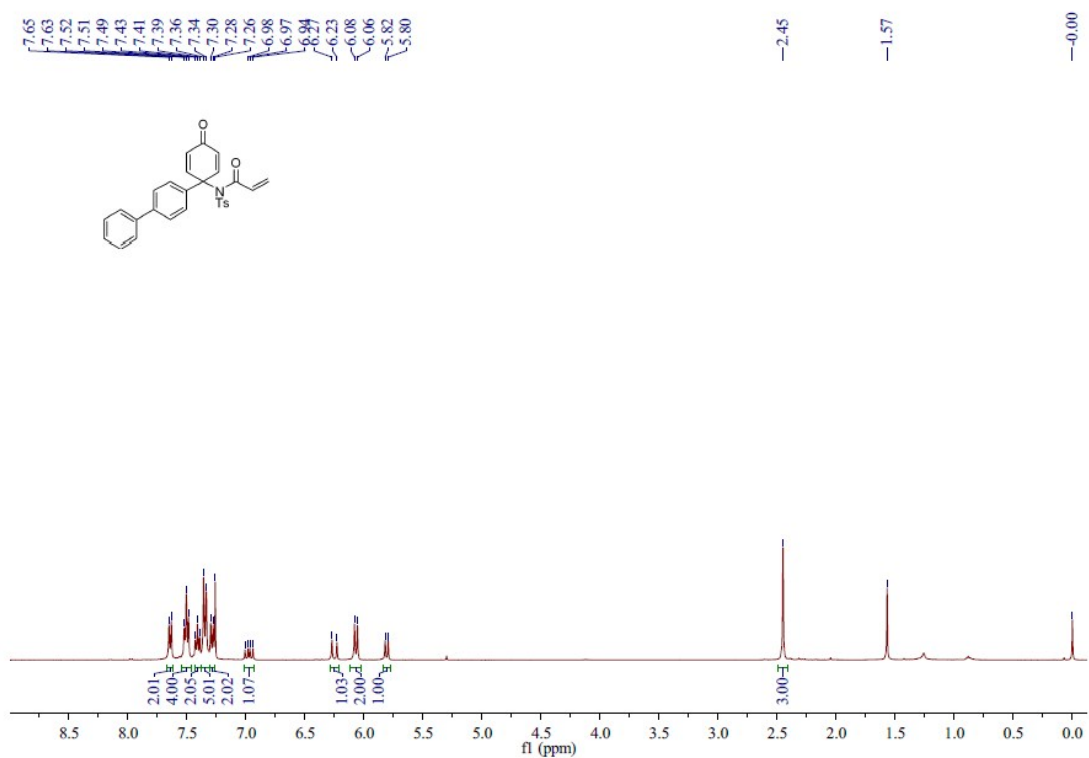

<sup>1</sup>H NMR spectra of **1k**

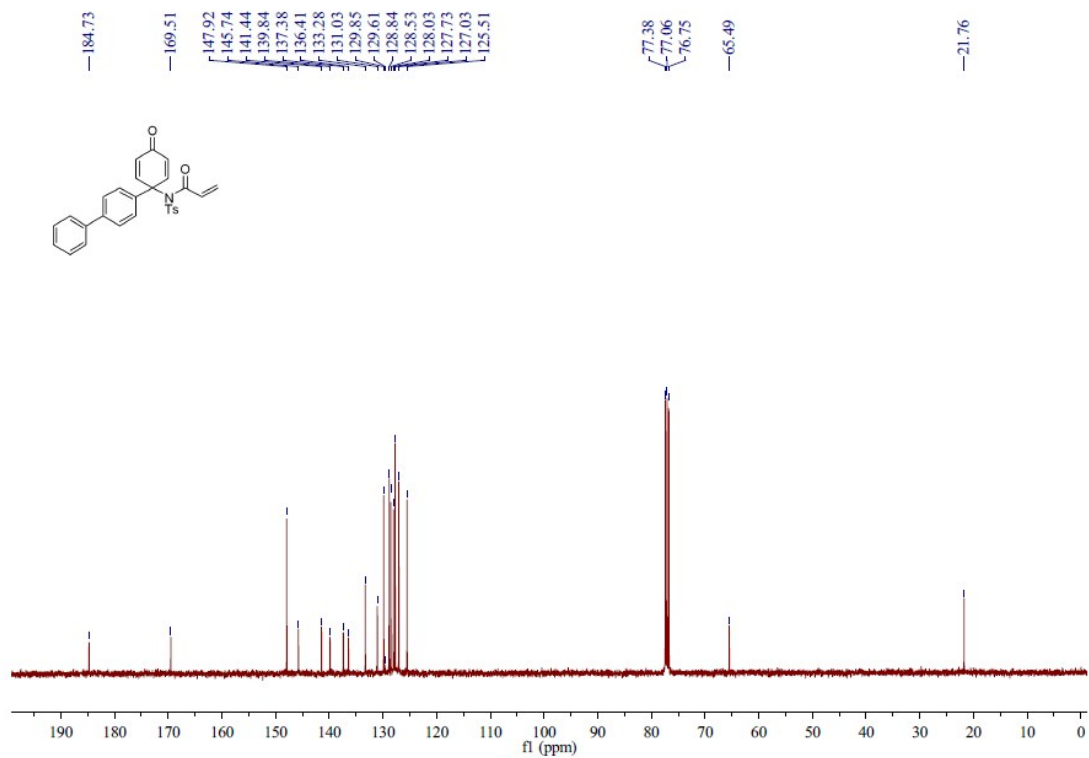

<sup>13</sup>C NMR spectra of **1k**

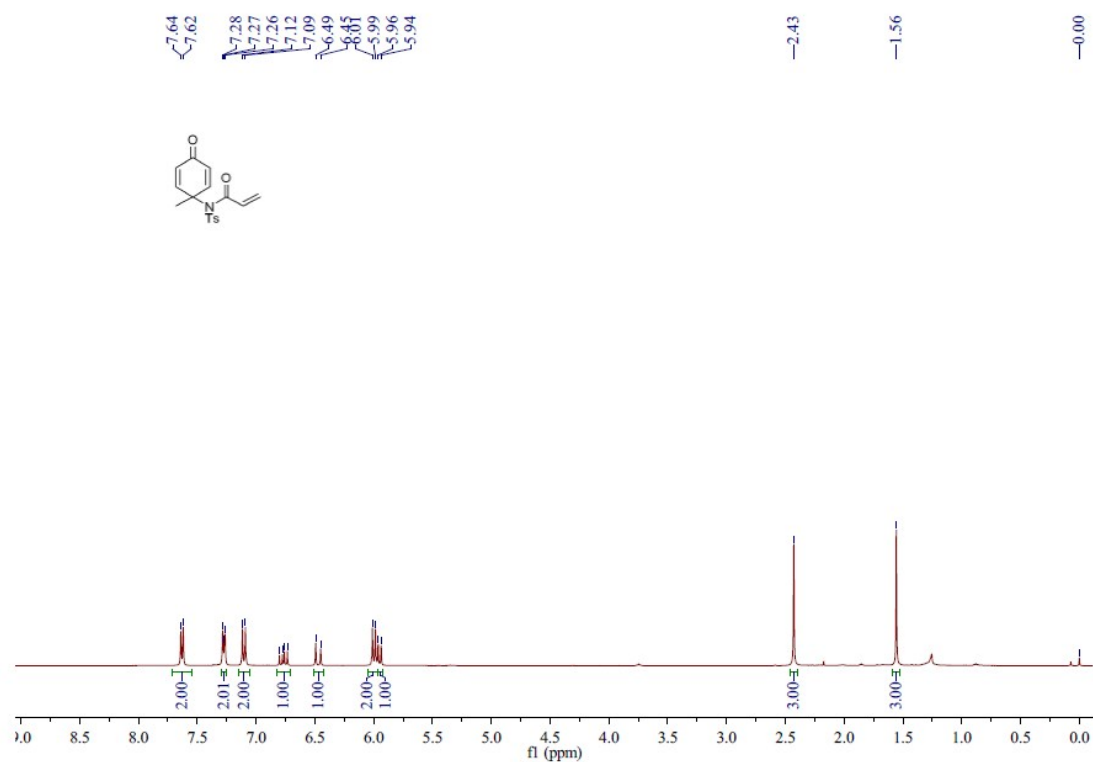

<sup>1</sup>H NMR spectra of **11**

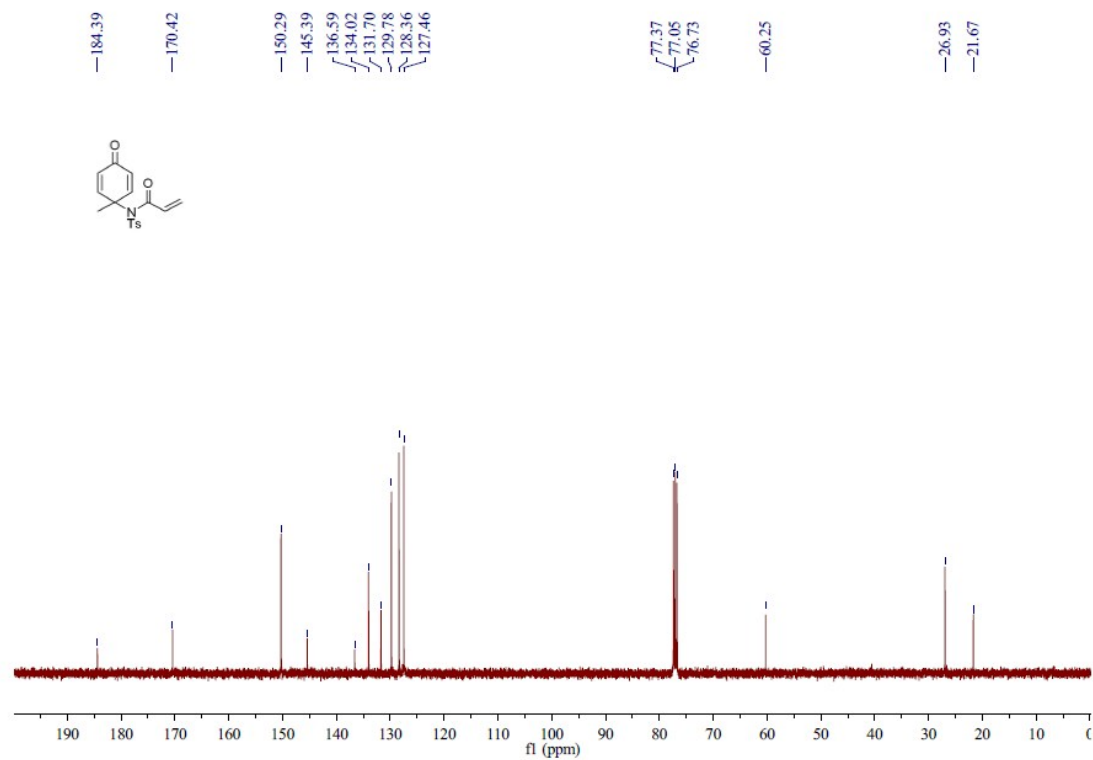

<sup>13</sup>C NMR spectra of **11**

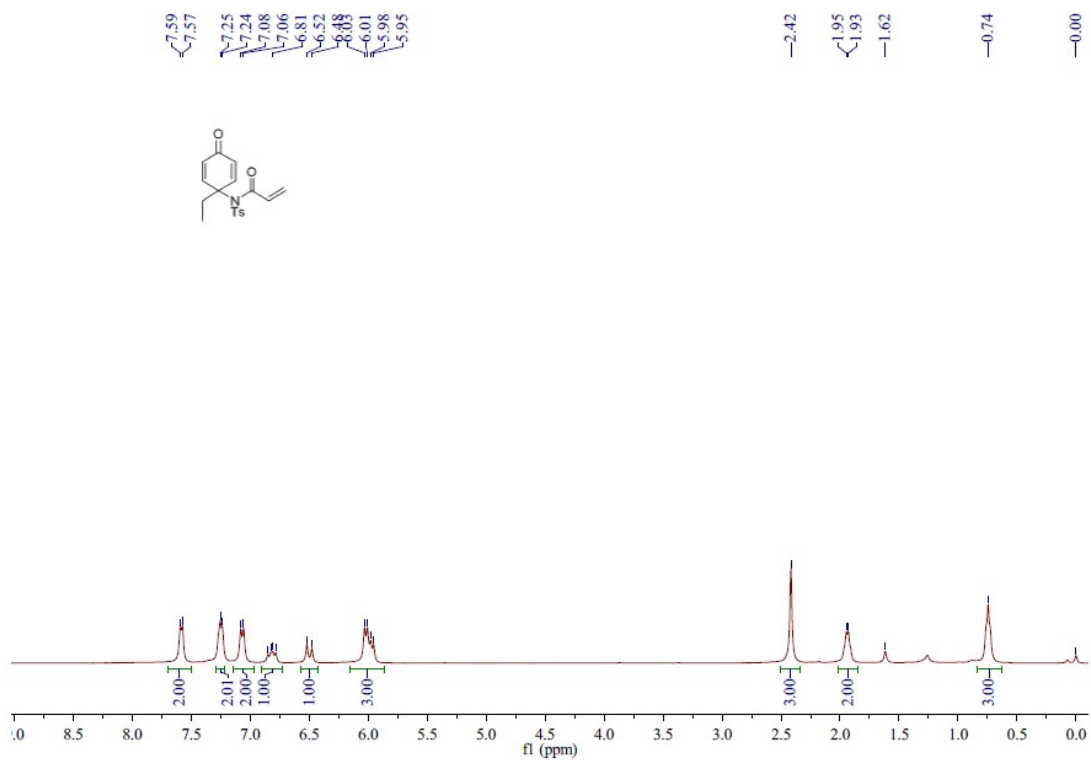

<sup>1</sup>H NMR spectra of **1m**

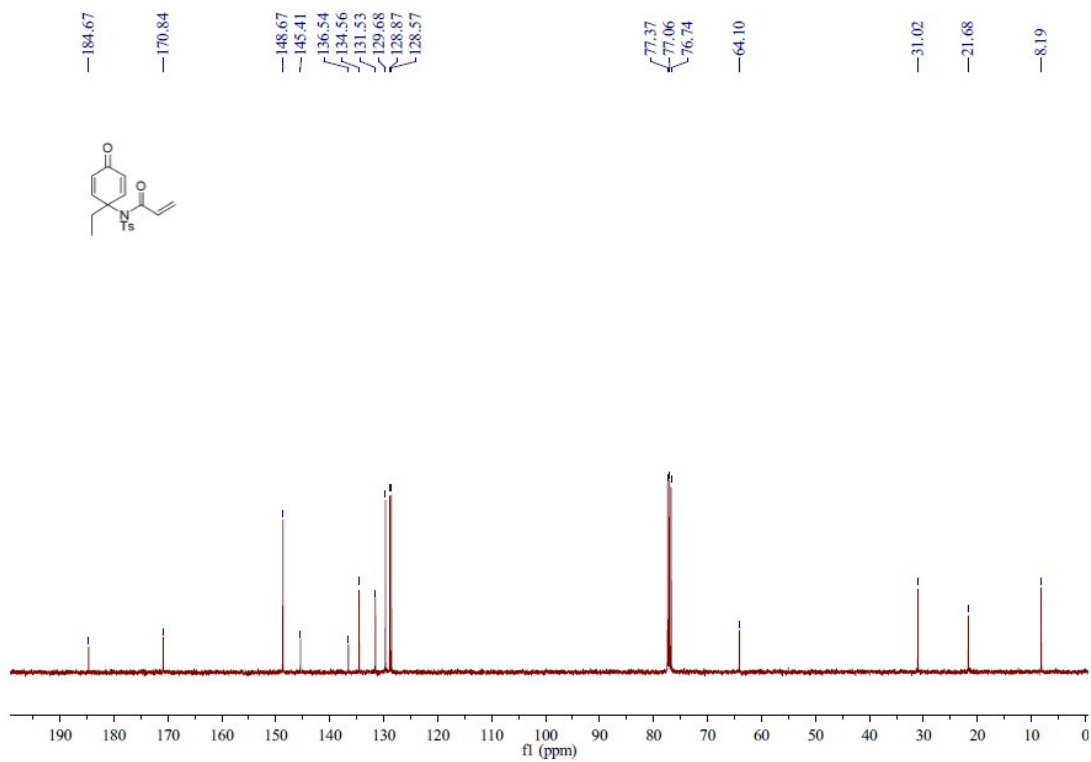

<sup>13</sup>C NMR spectra of **1m**

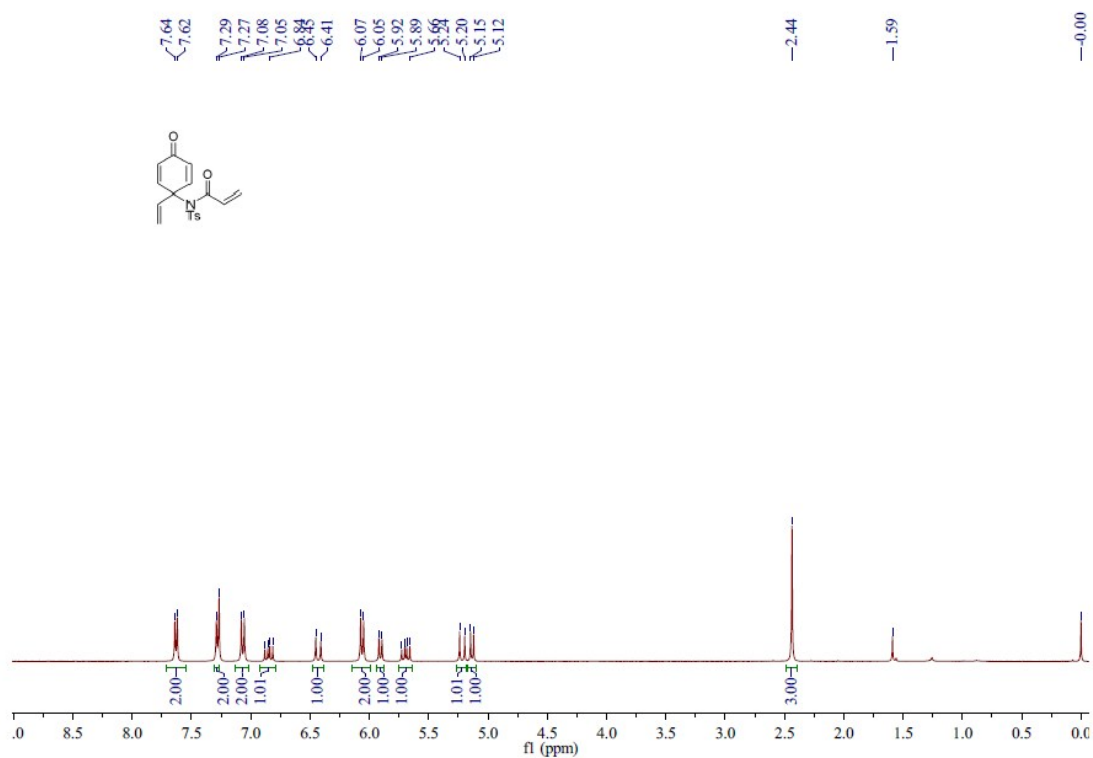

<sup>1</sup>H NMR spectra of **1n**

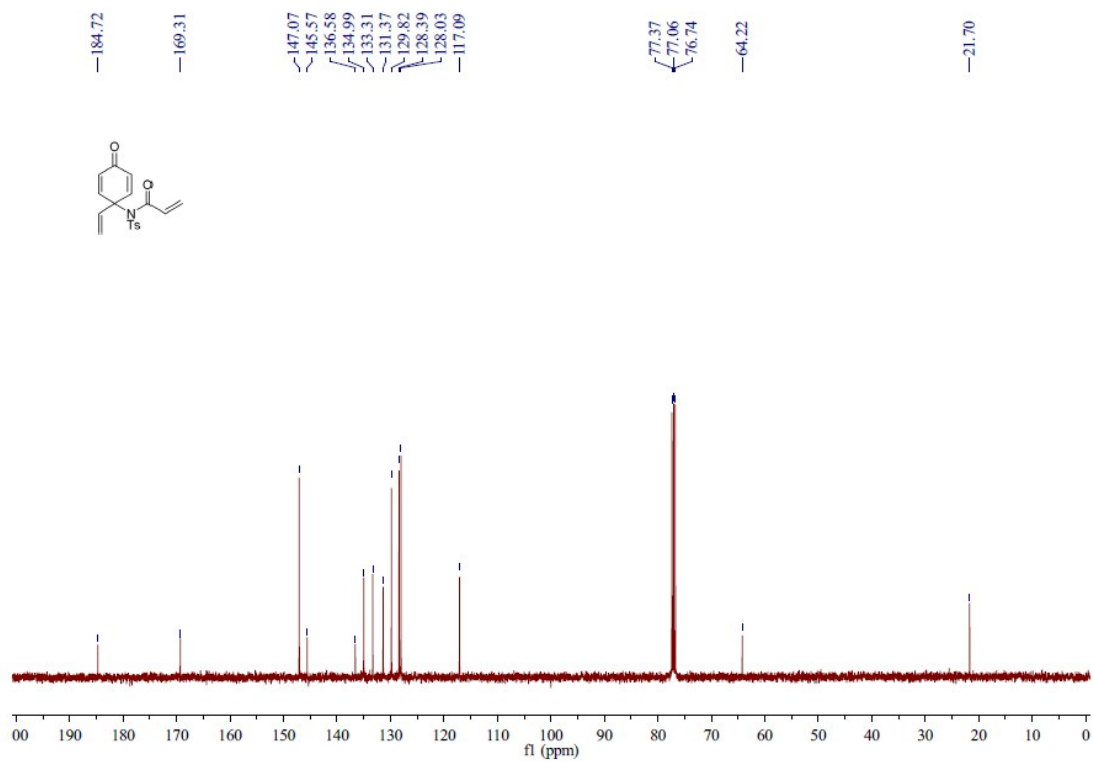

<sup>13</sup>C NMR spectra of **1n**

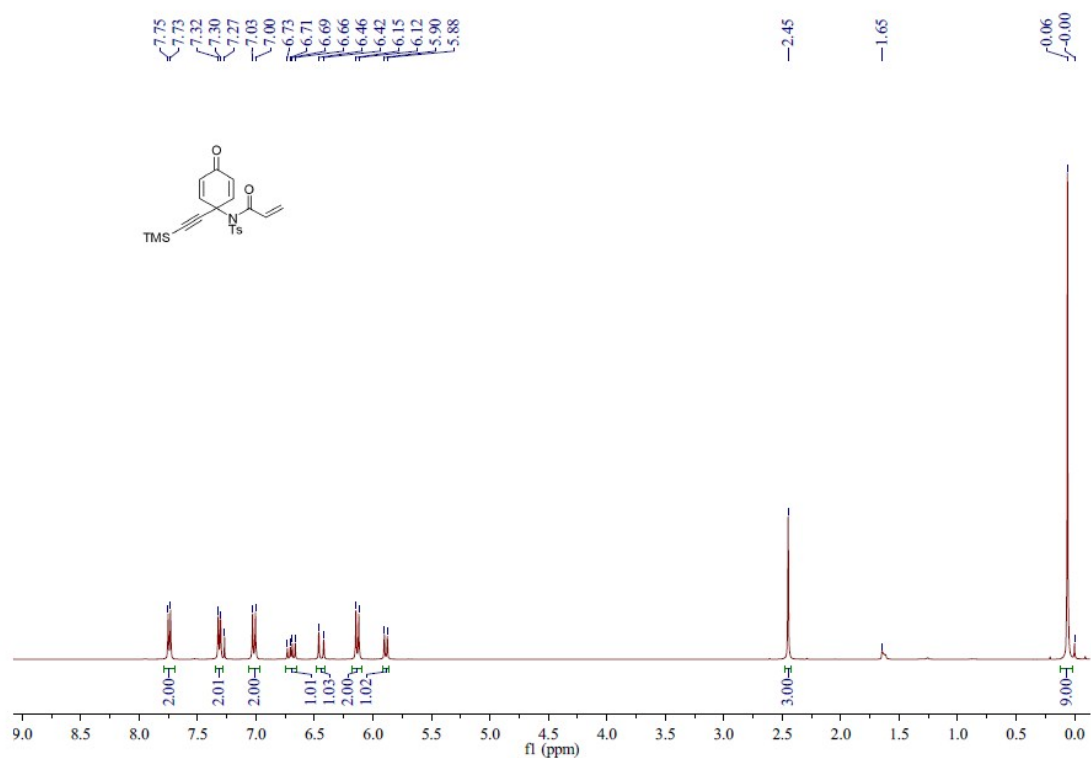

<sup>1</sup>H NMR spectra of **1o**

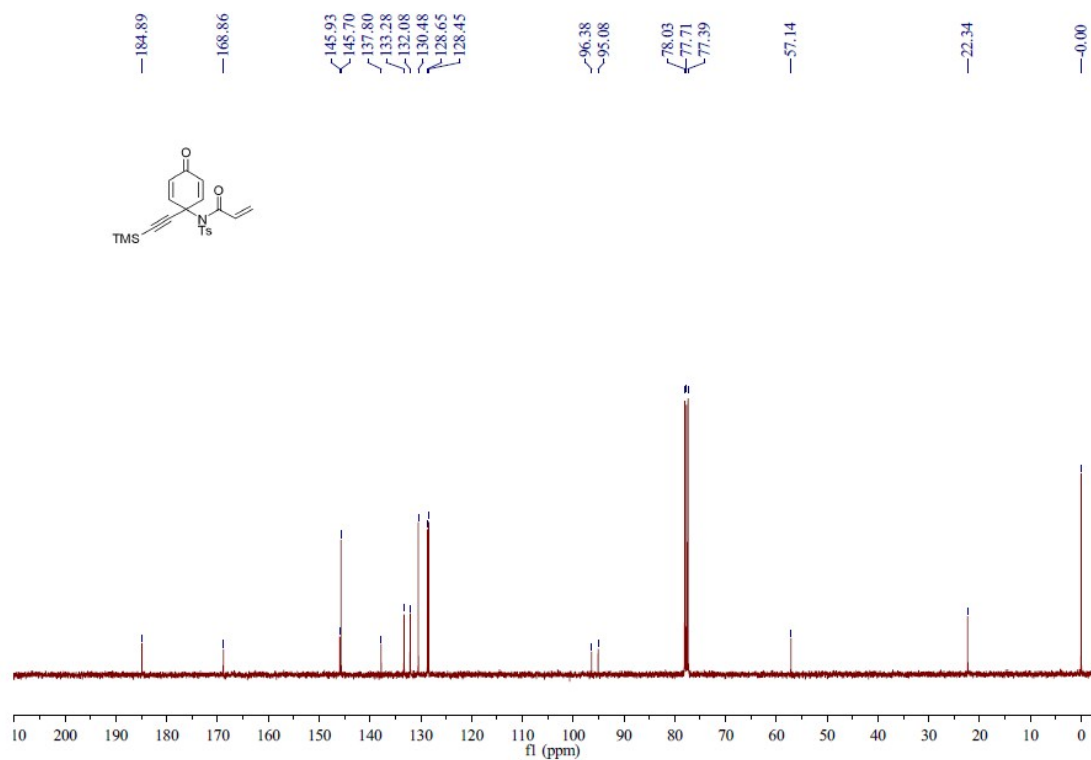

<sup>13</sup>C NMR spectra of **1o**

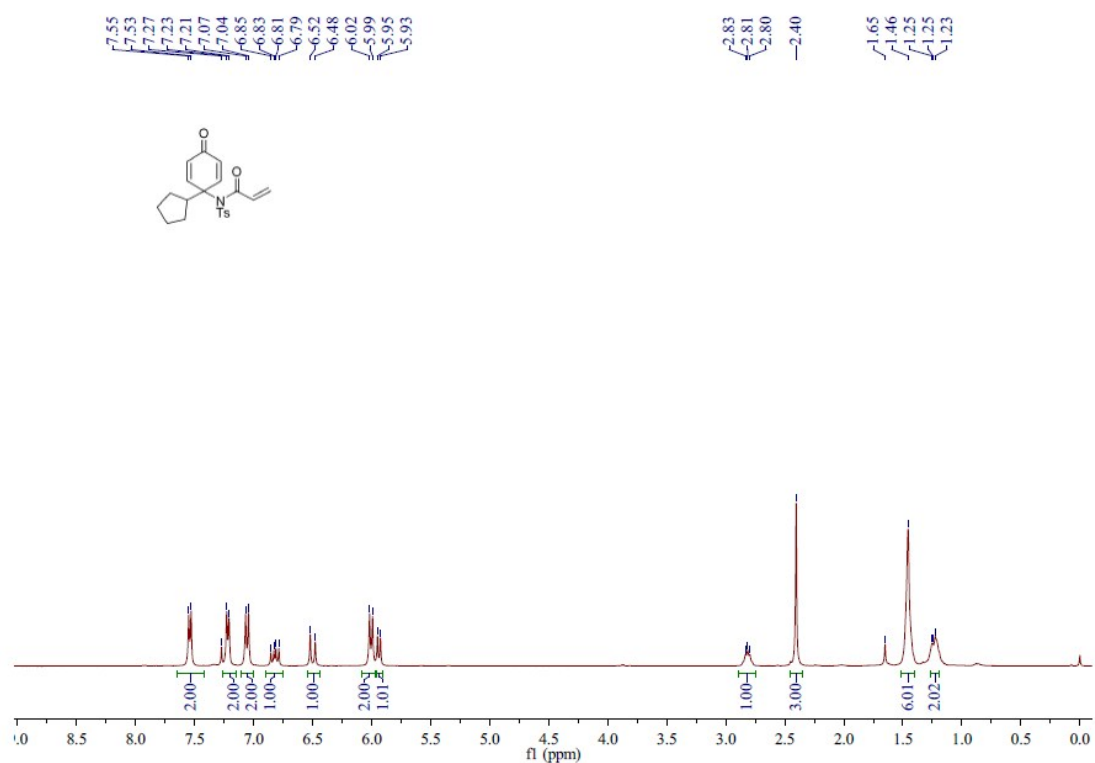

<sup>1</sup>H NMR spectra of **1p**

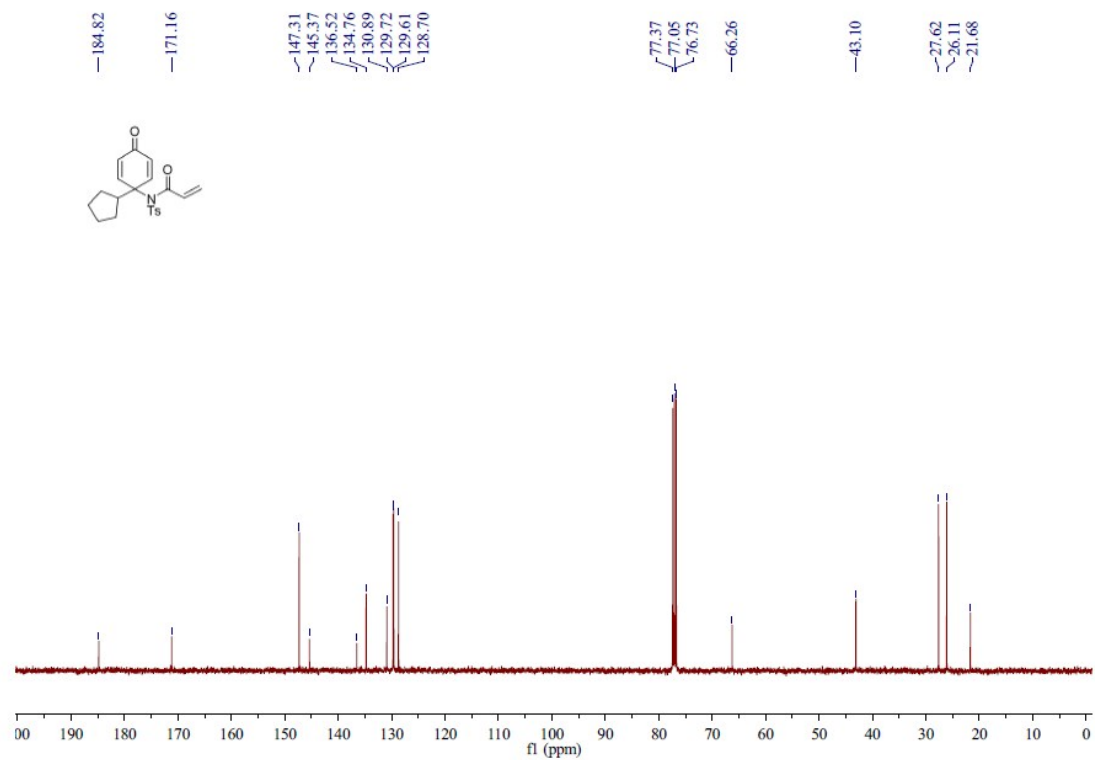

<sup>13</sup>C NMR spectra of **1p**



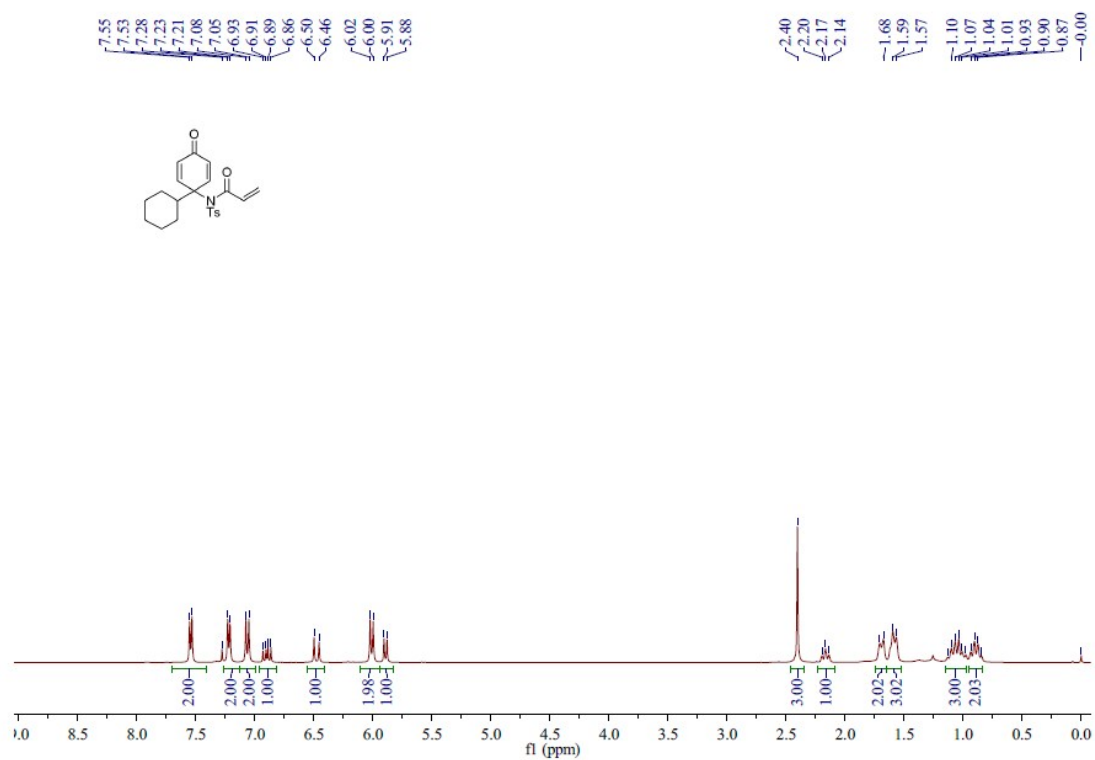

**<sup>1</sup>H NMR spectra of **1q****

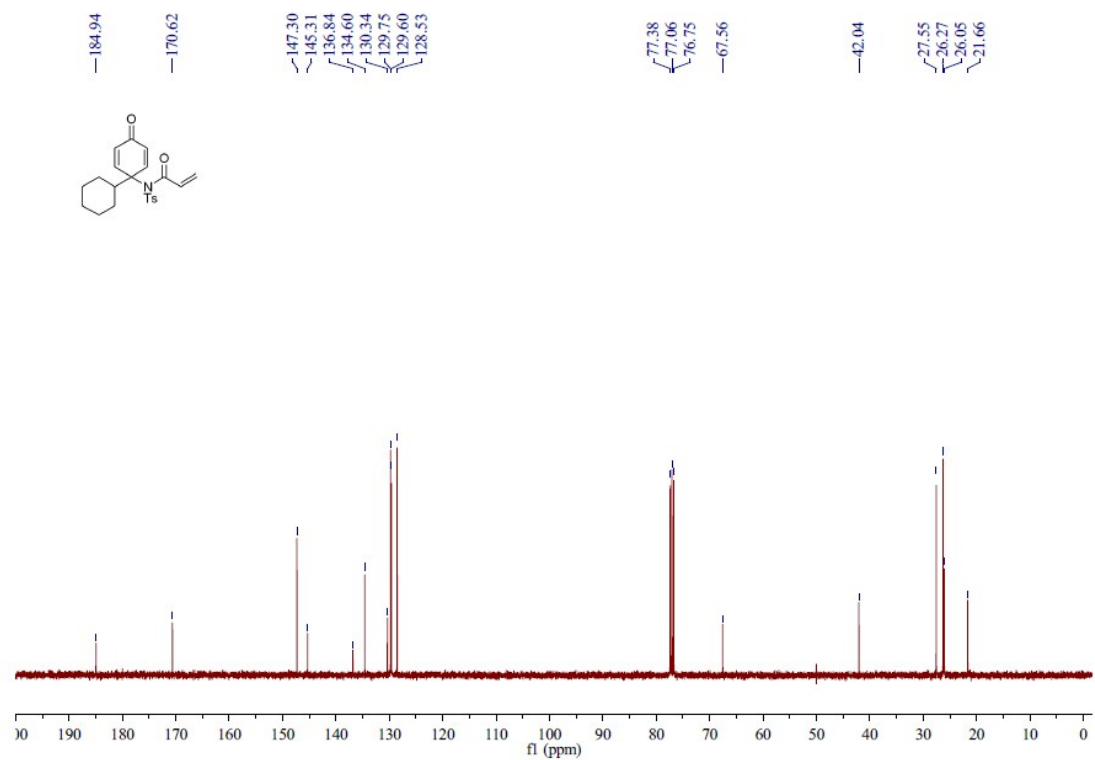

**<sup>13</sup>C NMR spectra of **1q****

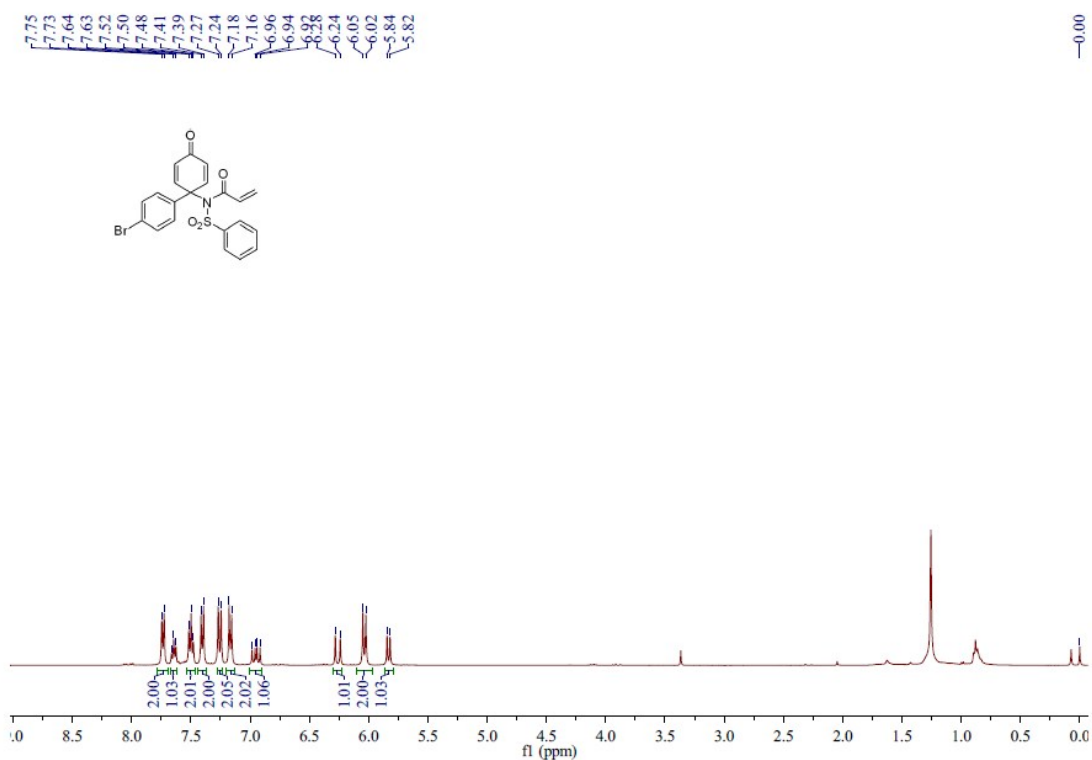

<sup>1</sup>H NMR spectra of **1r**

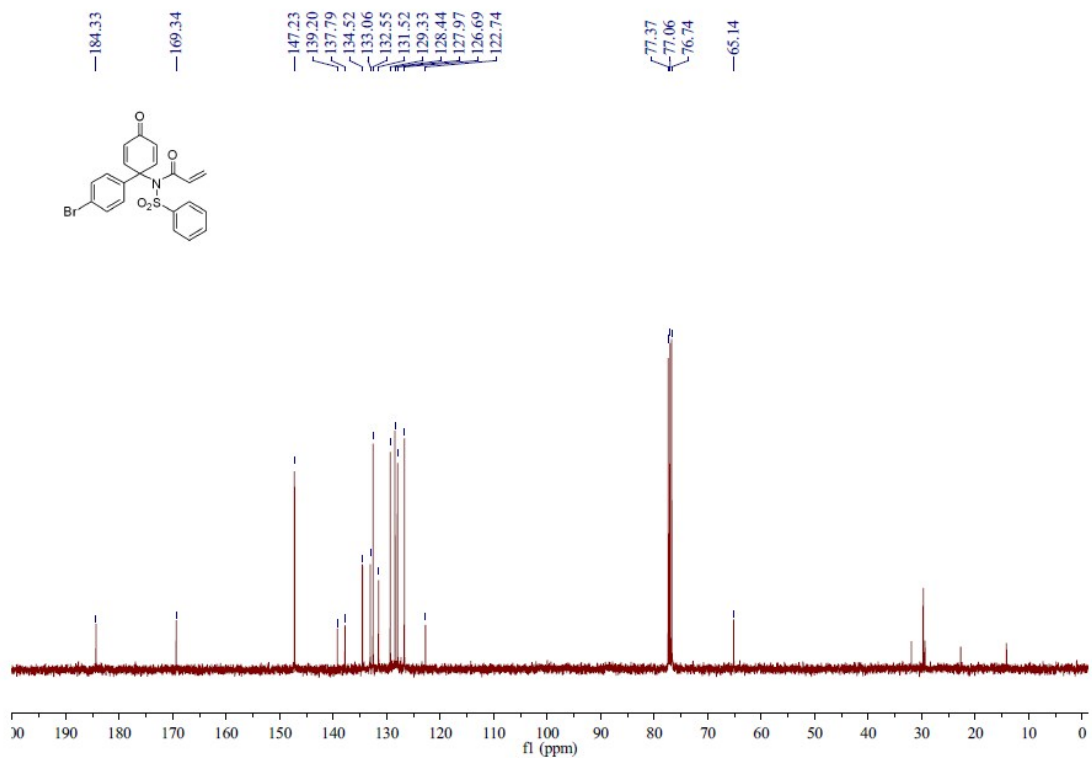

<sup>13</sup>C NMR spectra of **1r**

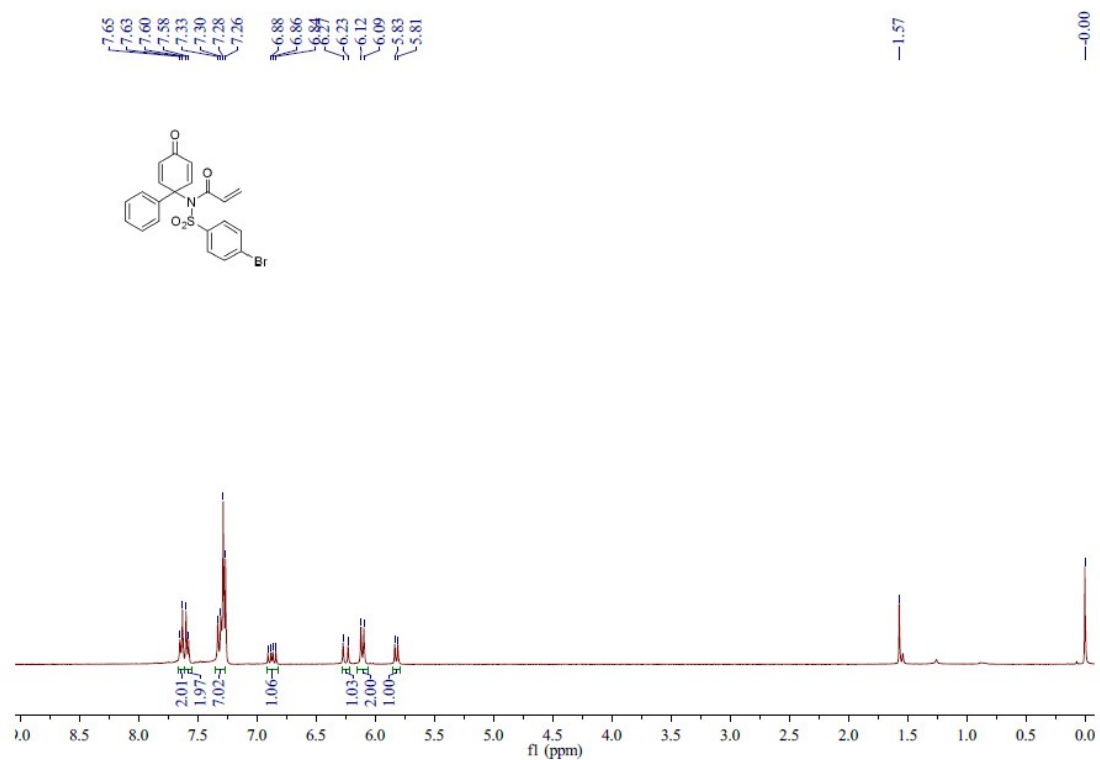

<sup>1</sup>H NMR spectra of **1s**

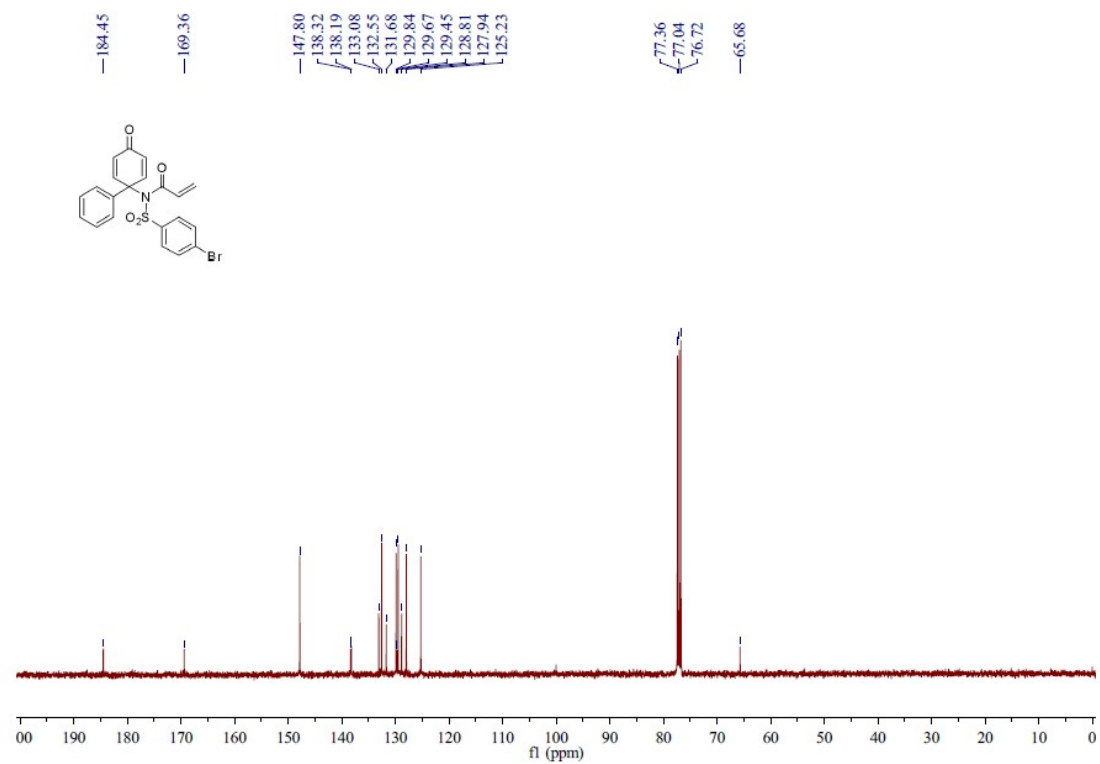

<sup>13</sup>C NMR spectra of **1s**

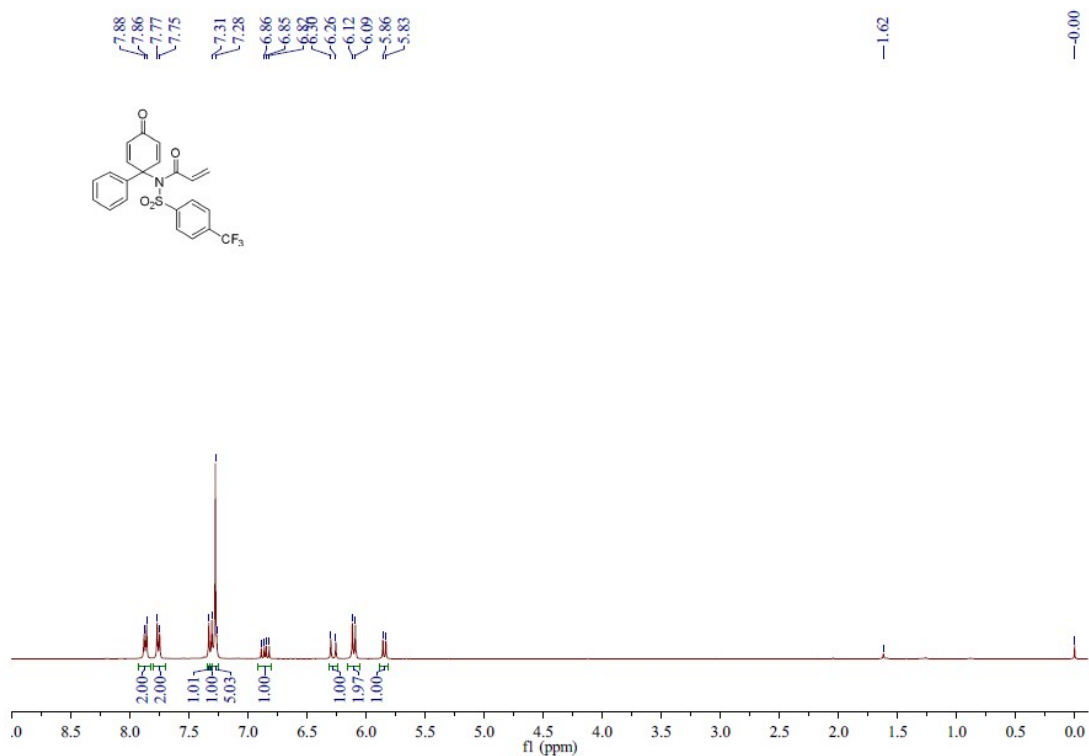

<sup>1</sup>H NMR spectra of **1t**

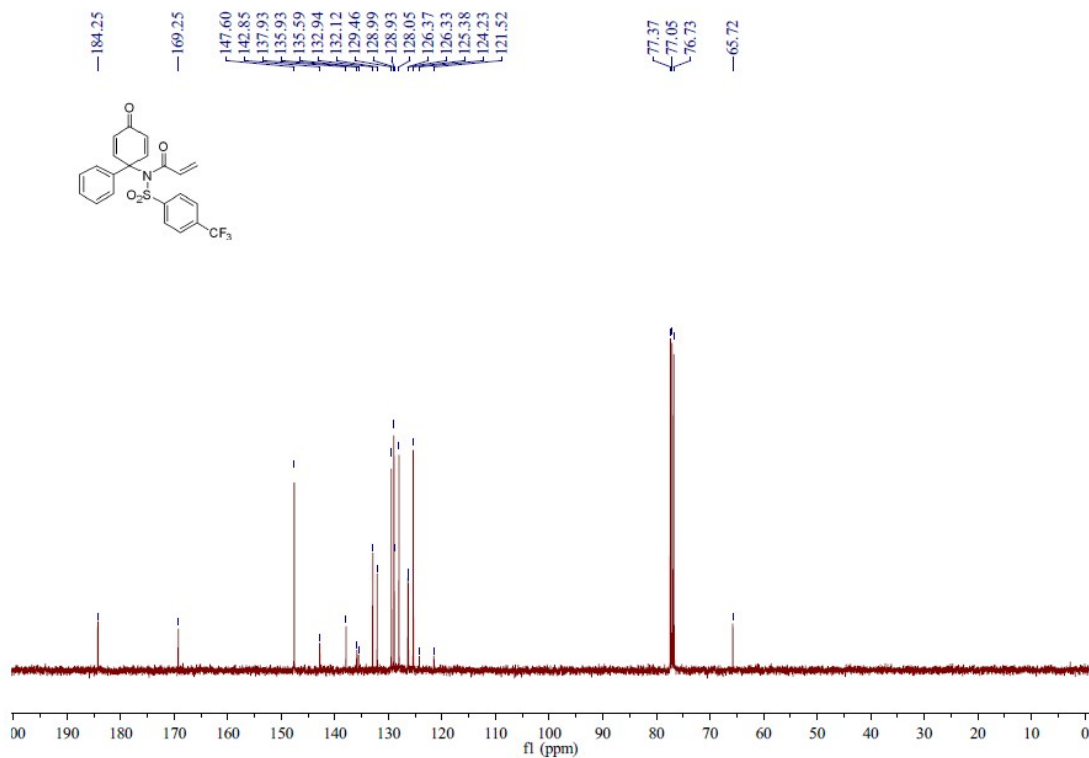

<sup>13</sup>C NMR spectra of **1t**

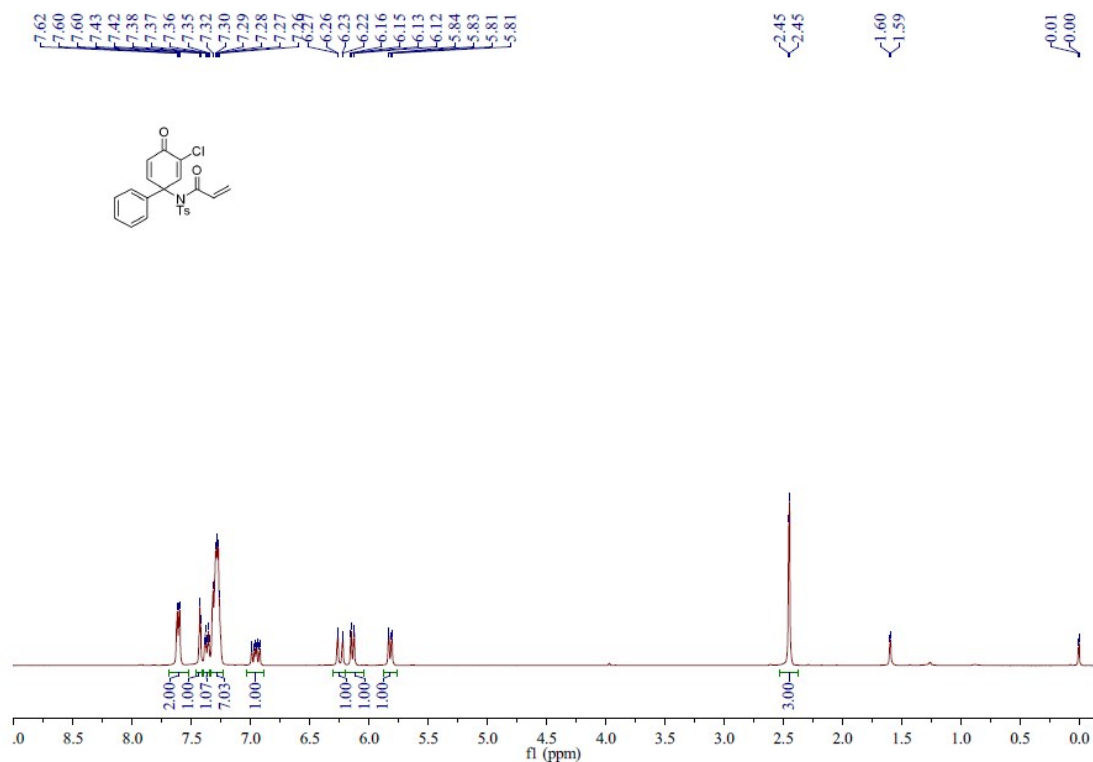

<sup>1</sup>H NMR spectra of **1u**

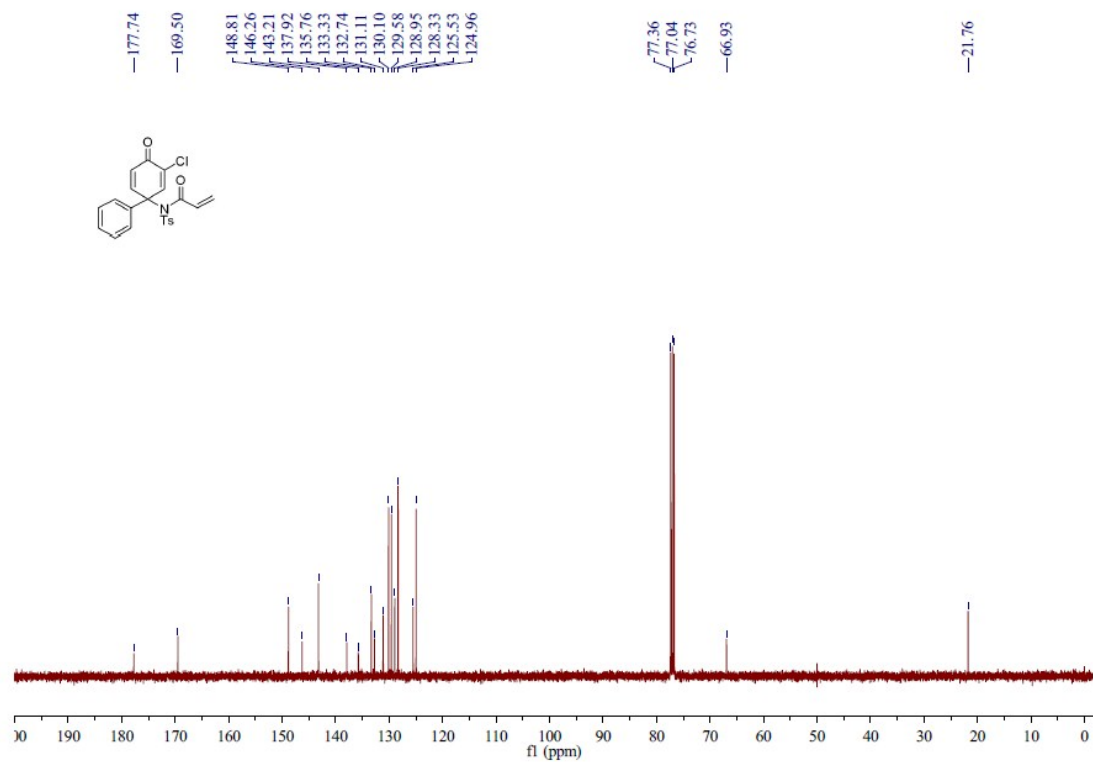

<sup>13</sup>C NMR spectra of **1u**

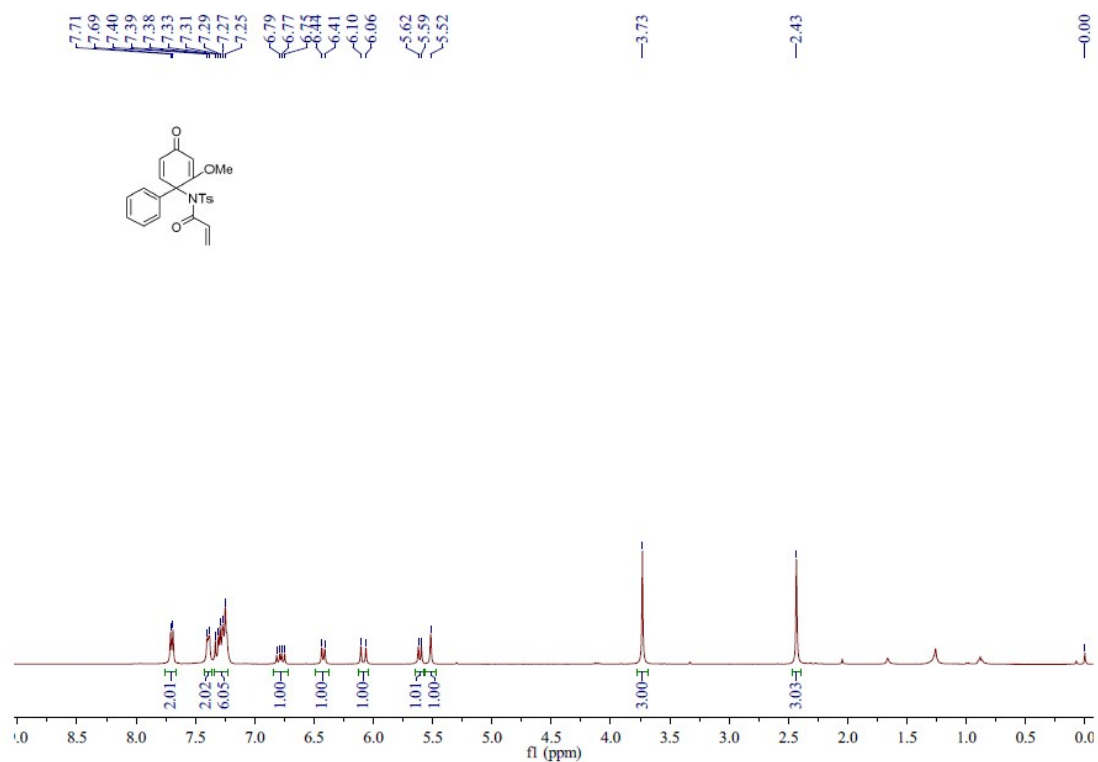

<sup>1</sup>H NMR spectra of **1v**

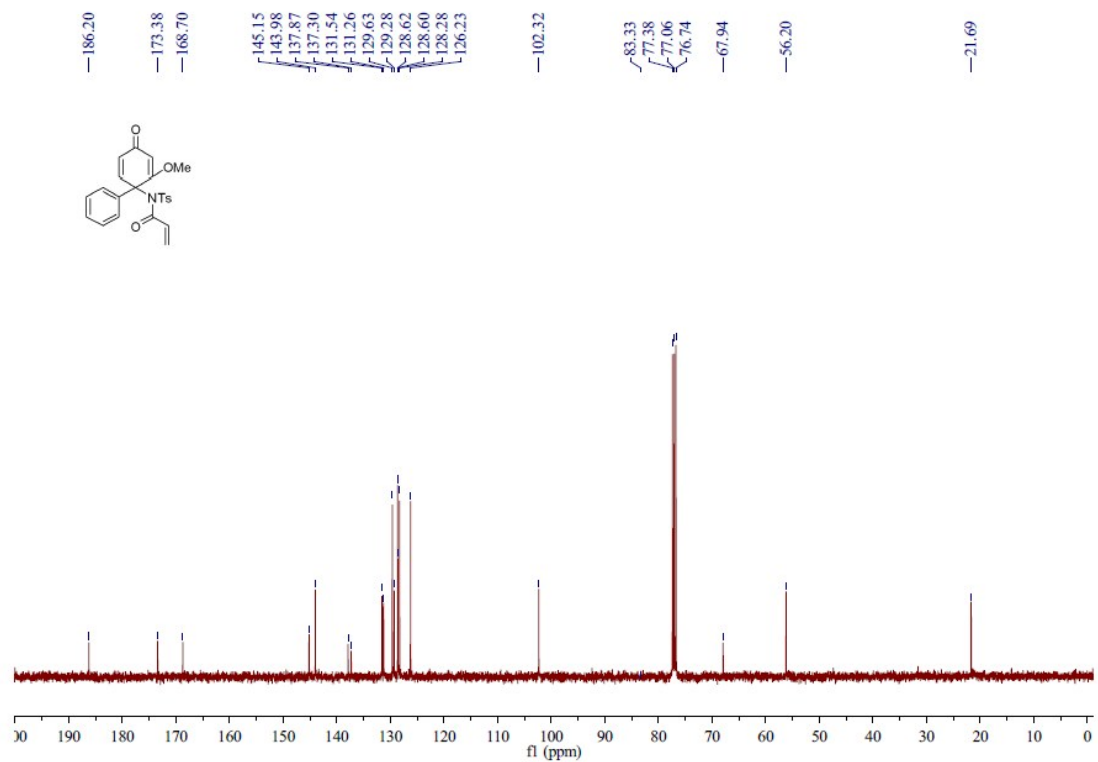

<sup>13</sup>C NMR spectra of **1v**

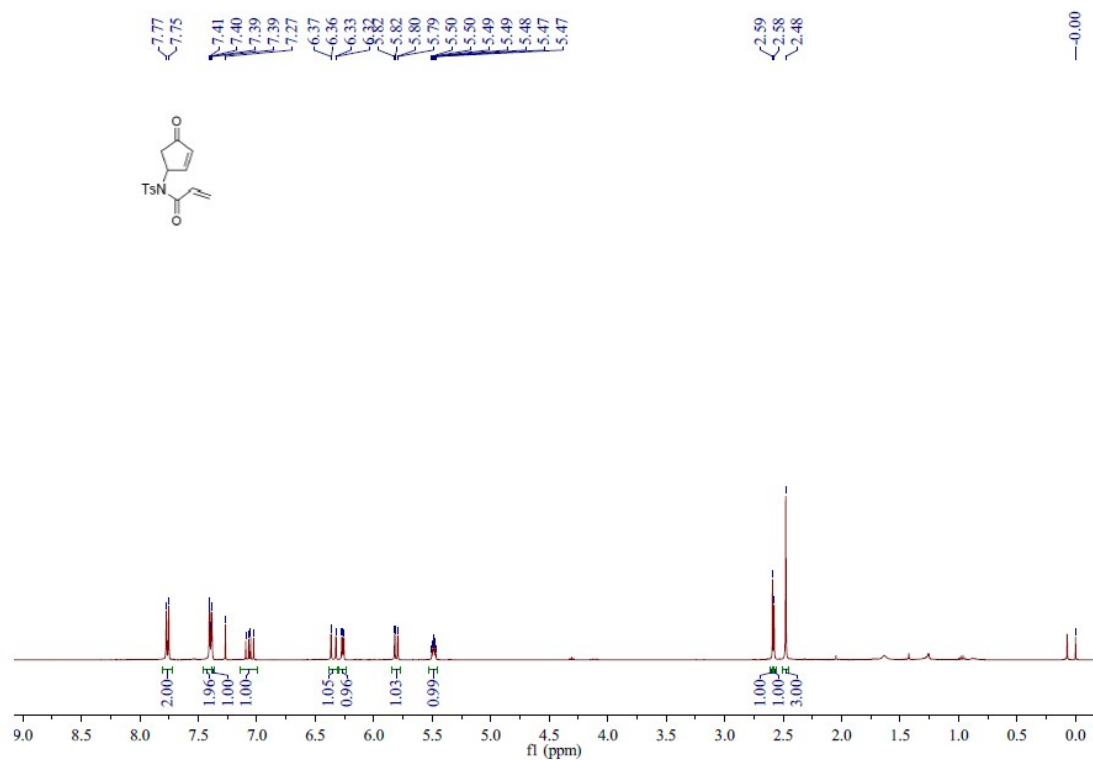

<sup>1</sup>H NMR spectra of **1w**

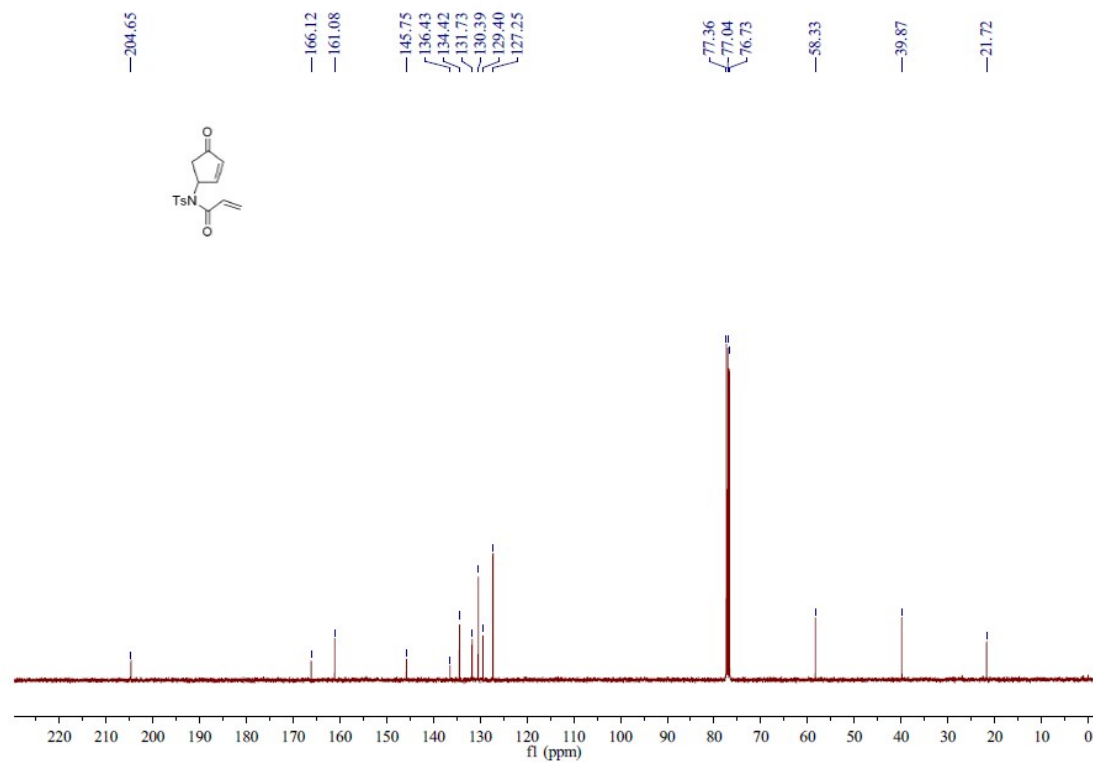

<sup>13</sup>C NMR spectra of **1w**

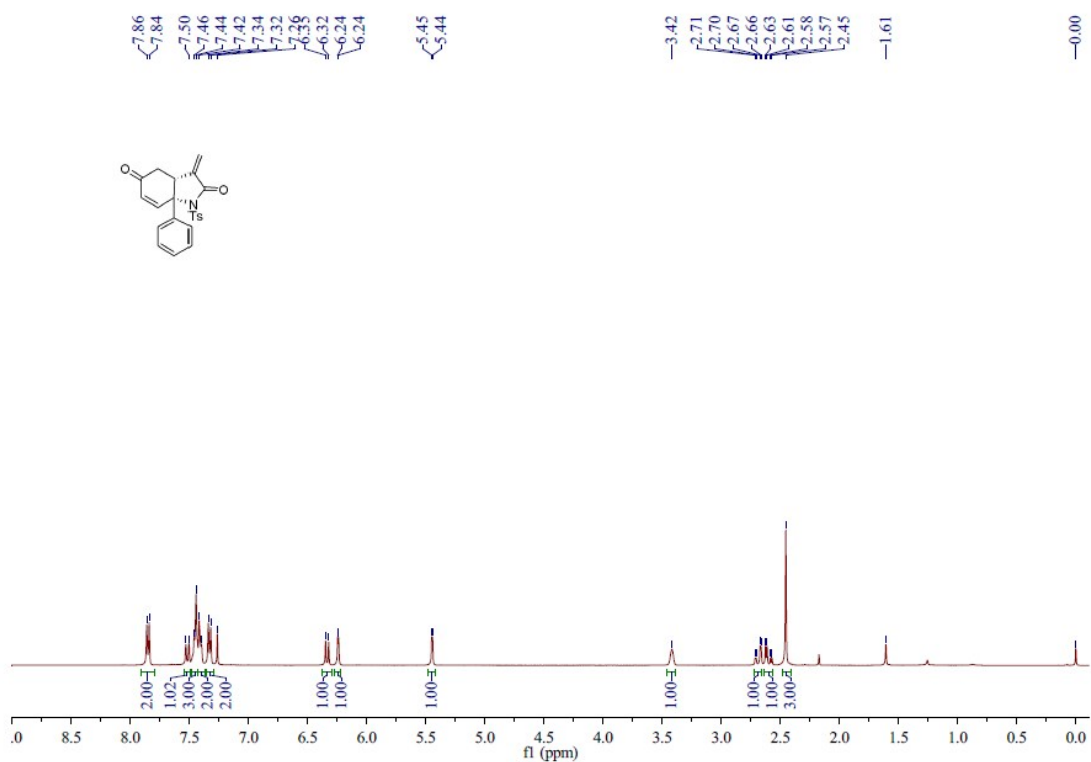

<sup>1</sup>H NMR spectra of **2a**

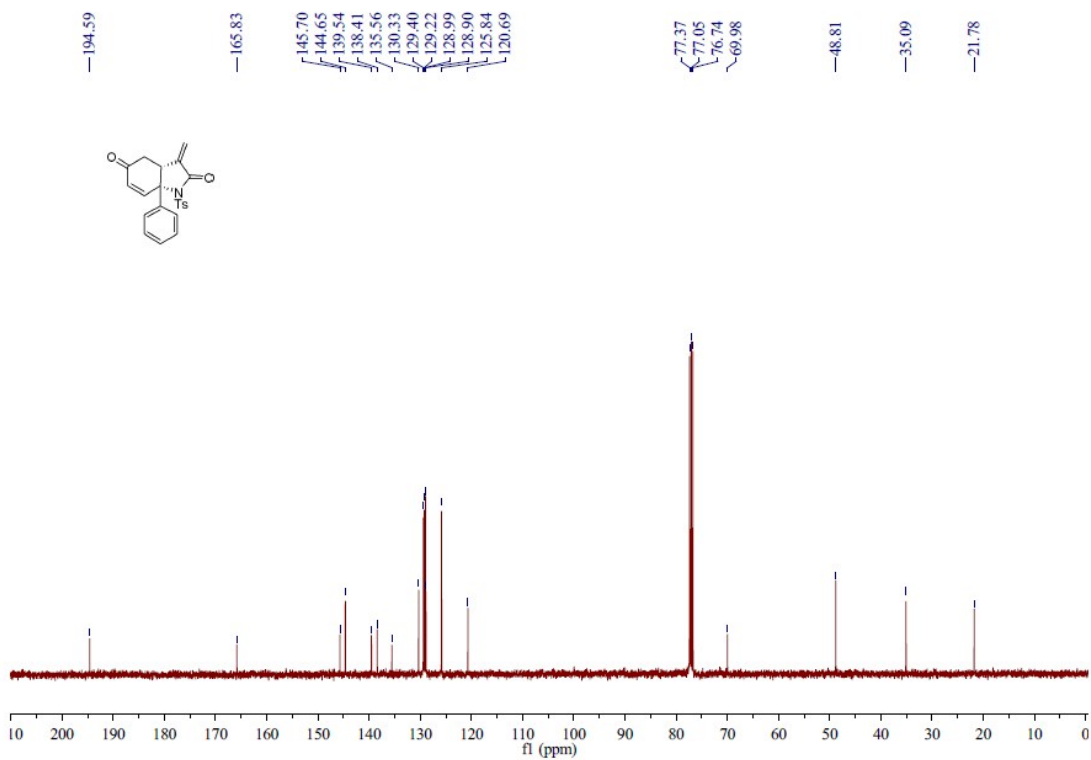

<sup>13</sup>C NMR spectra of **2a**



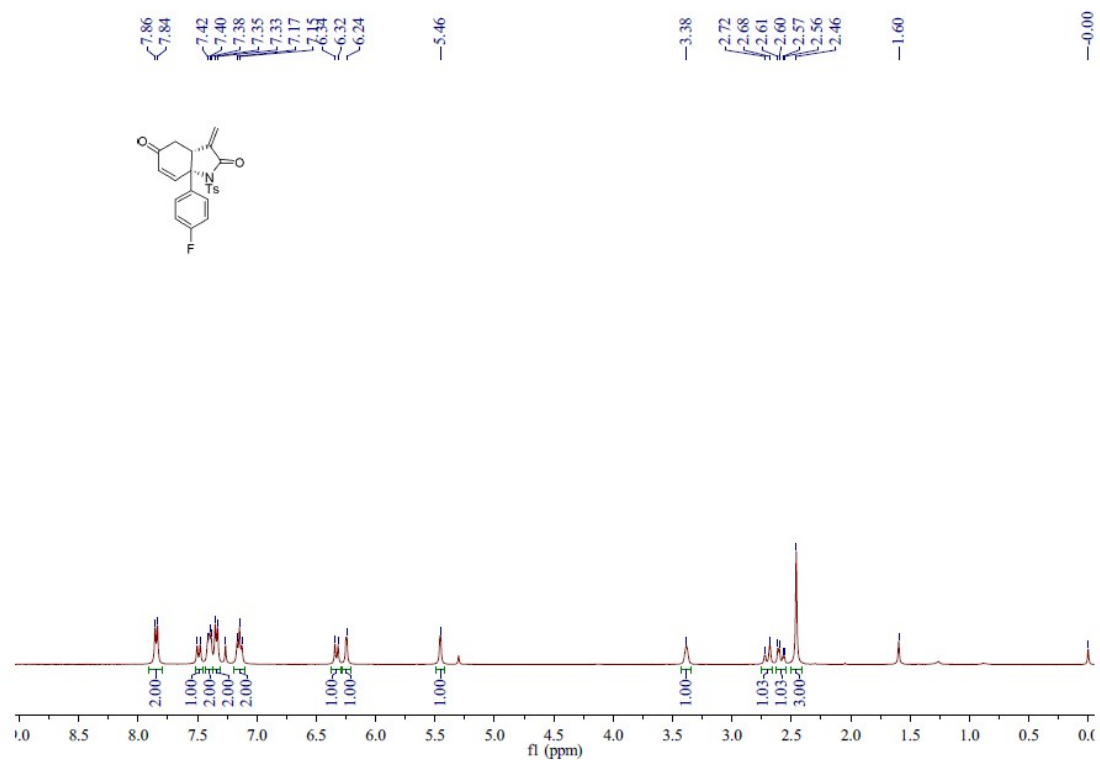

<sup>1</sup>H NMR spectra of **2b**

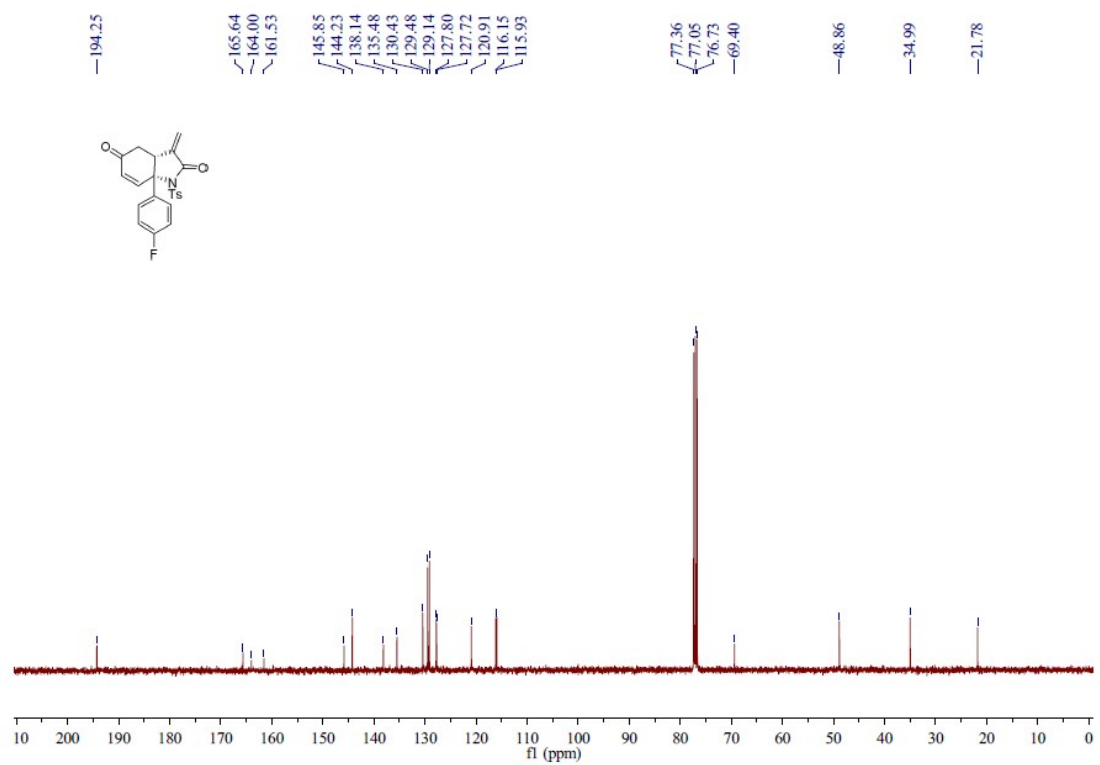

<sup>13</sup>C NMR spectra of **2b**

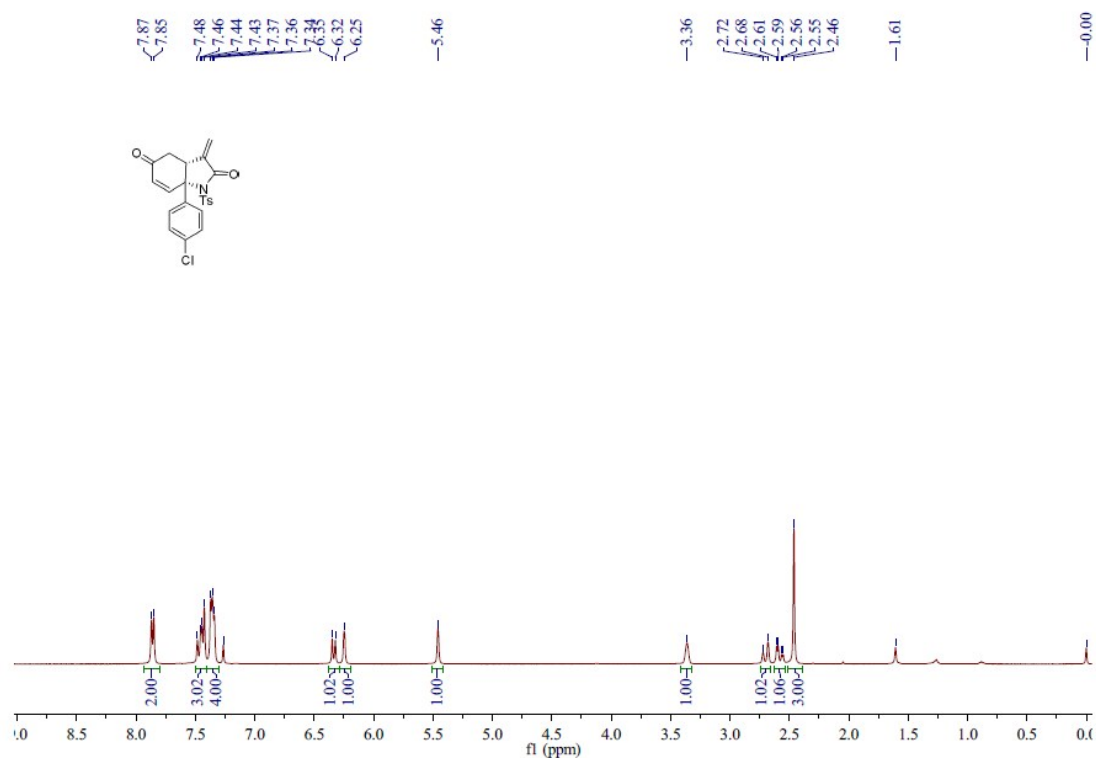

<sup>1</sup>H NMR spectra of **2c**

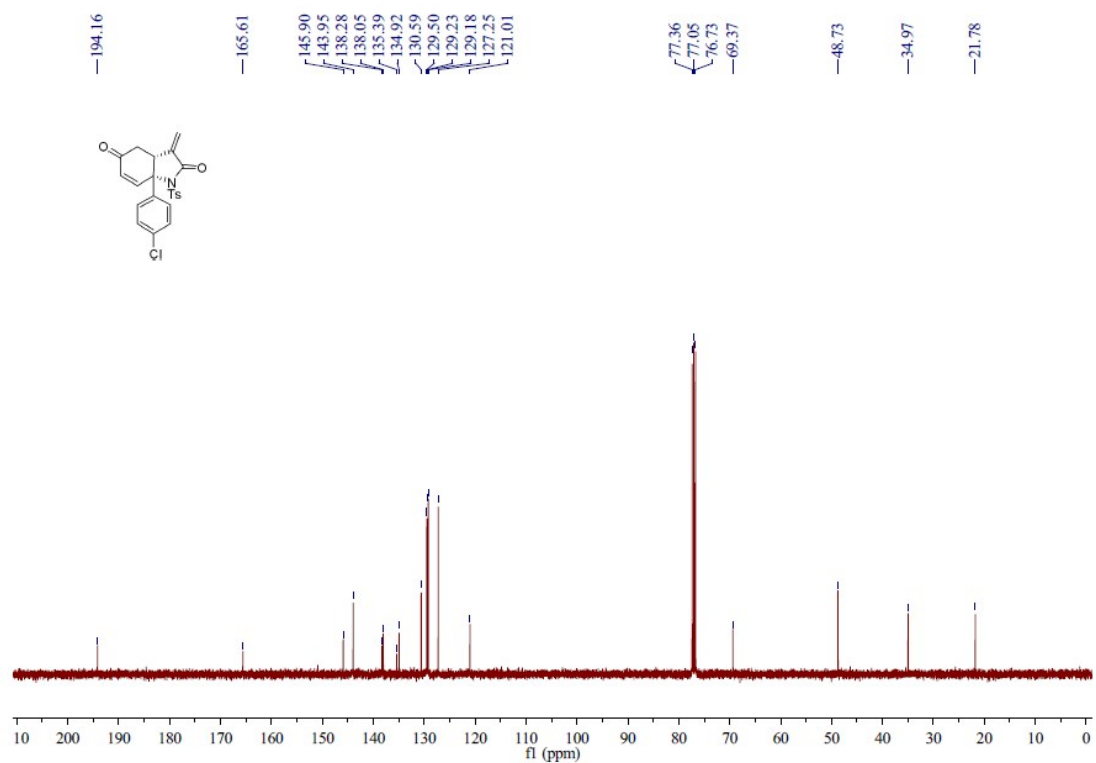

<sup>13</sup>C NMR spectra of **2c**

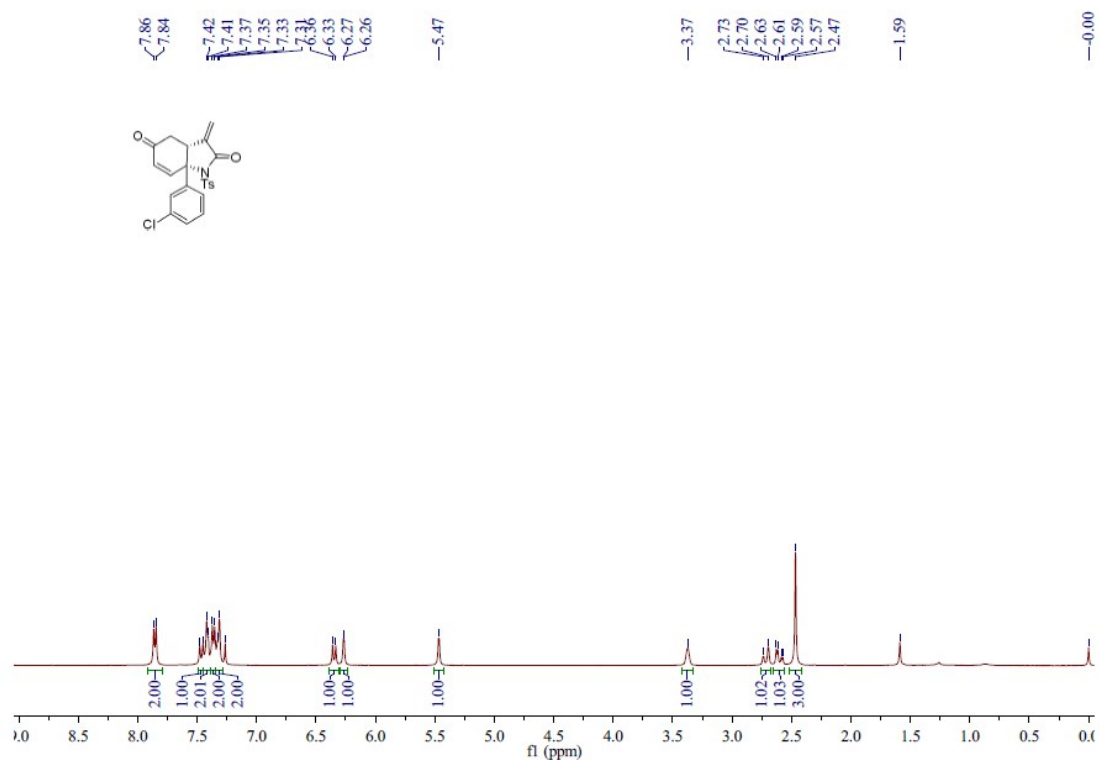

<sup>1</sup>H NMR spectra of **2d**

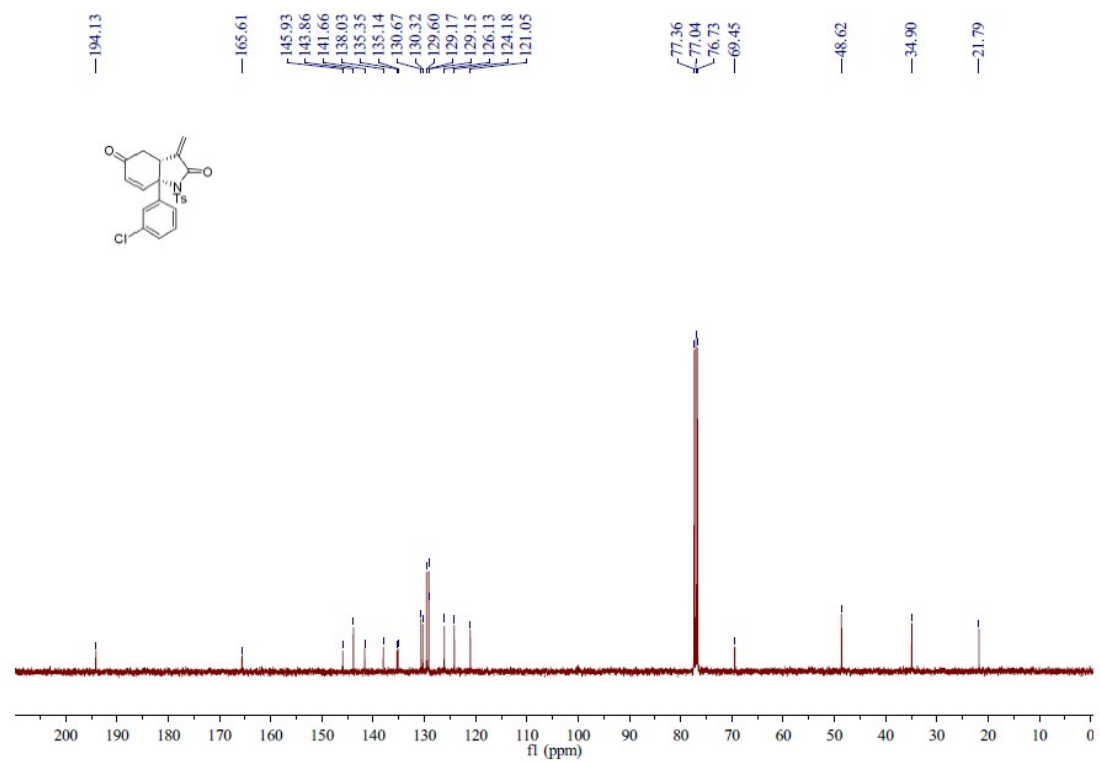

<sup>13</sup>C NMR spectra of **2d**

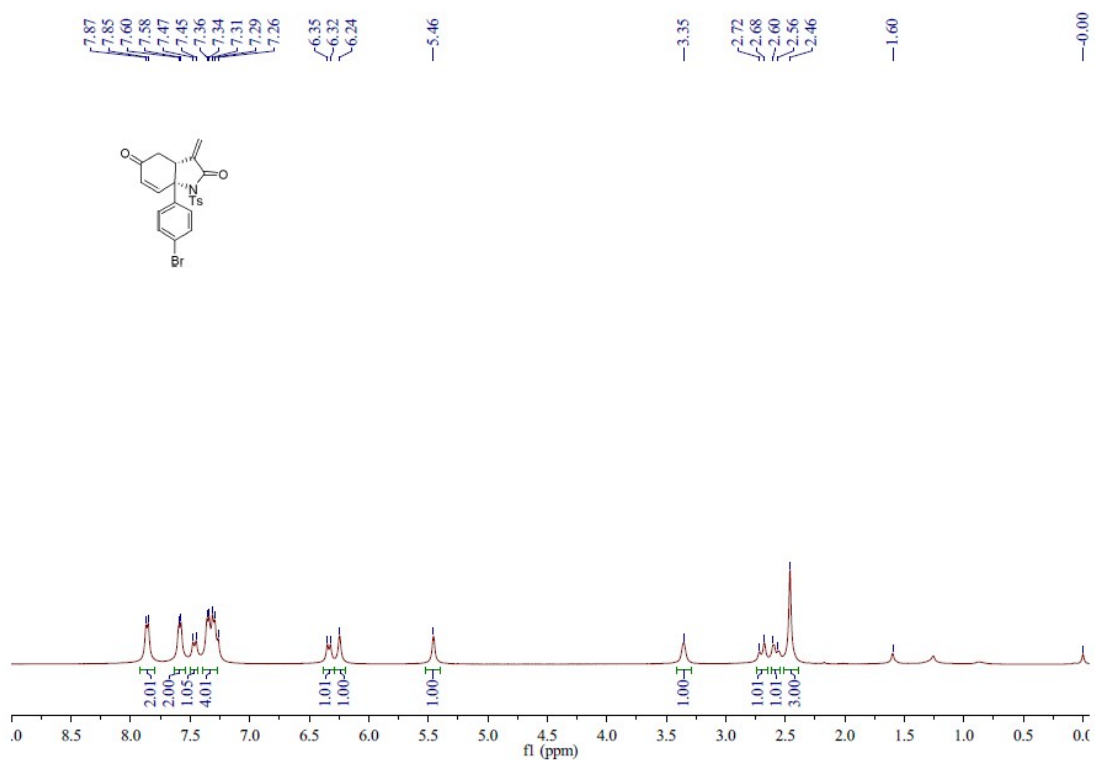

$^1\text{H}$  NMR spectra of **2e**

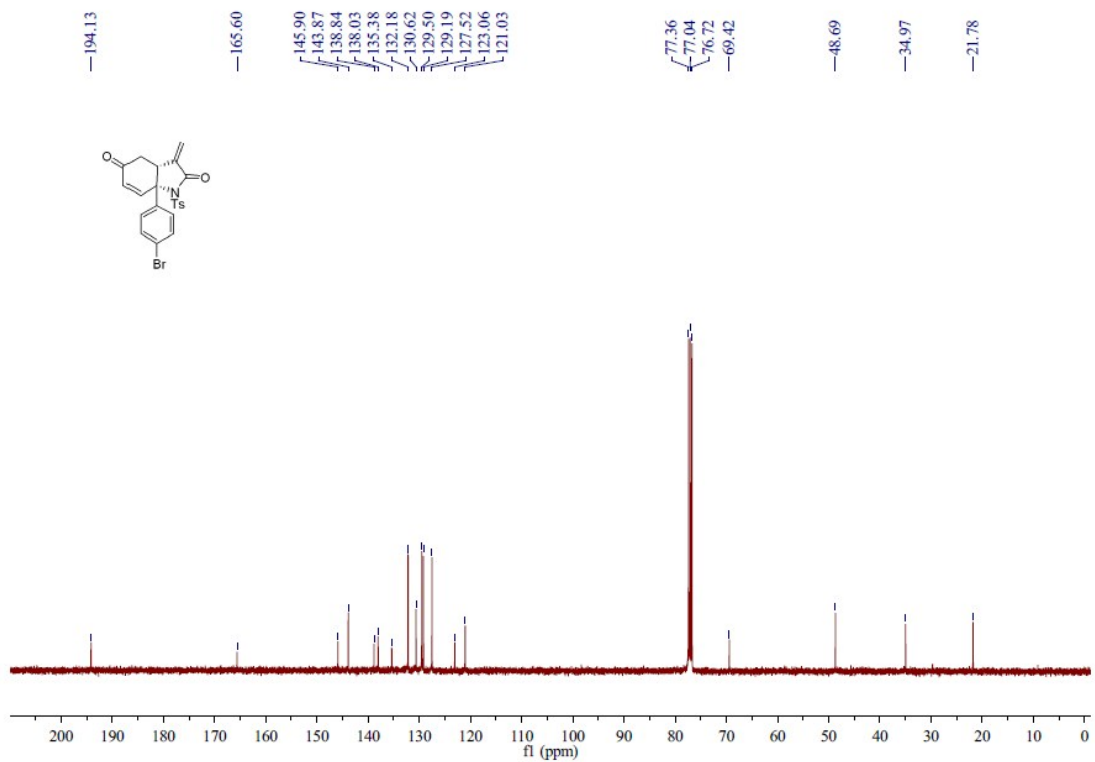

$^{13}\text{C}$  NMR spectra of **2e**

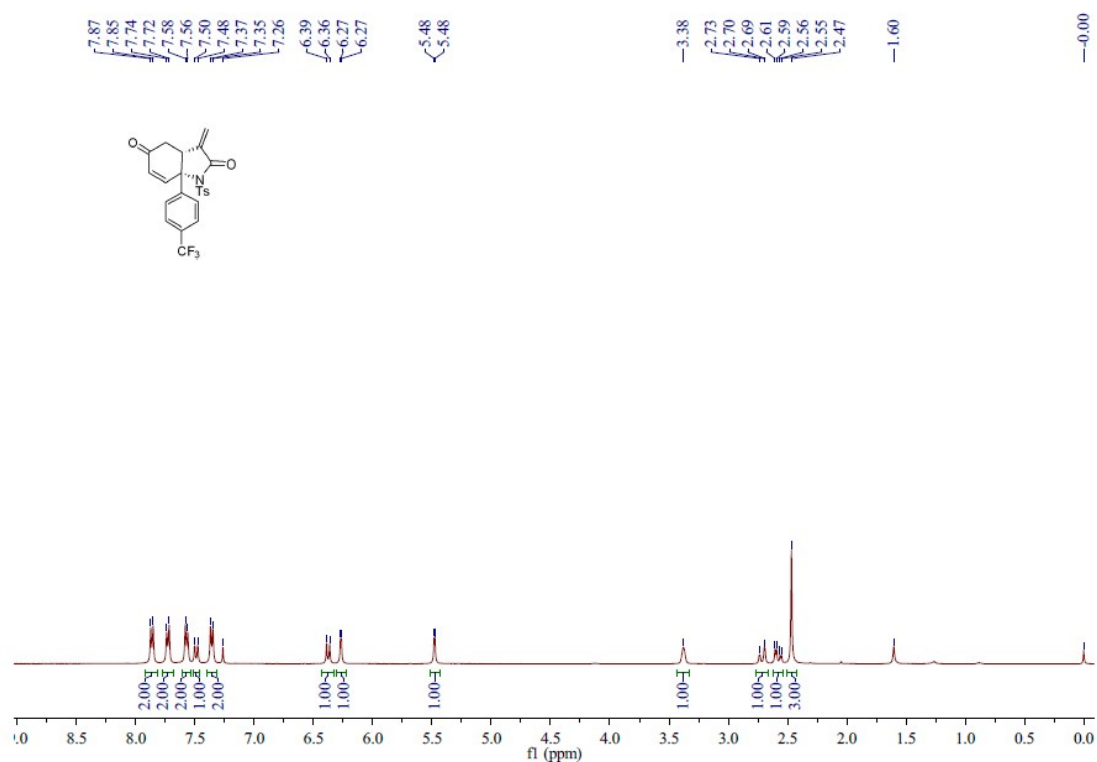

<sup>1</sup>H NMR spectra of **2f**

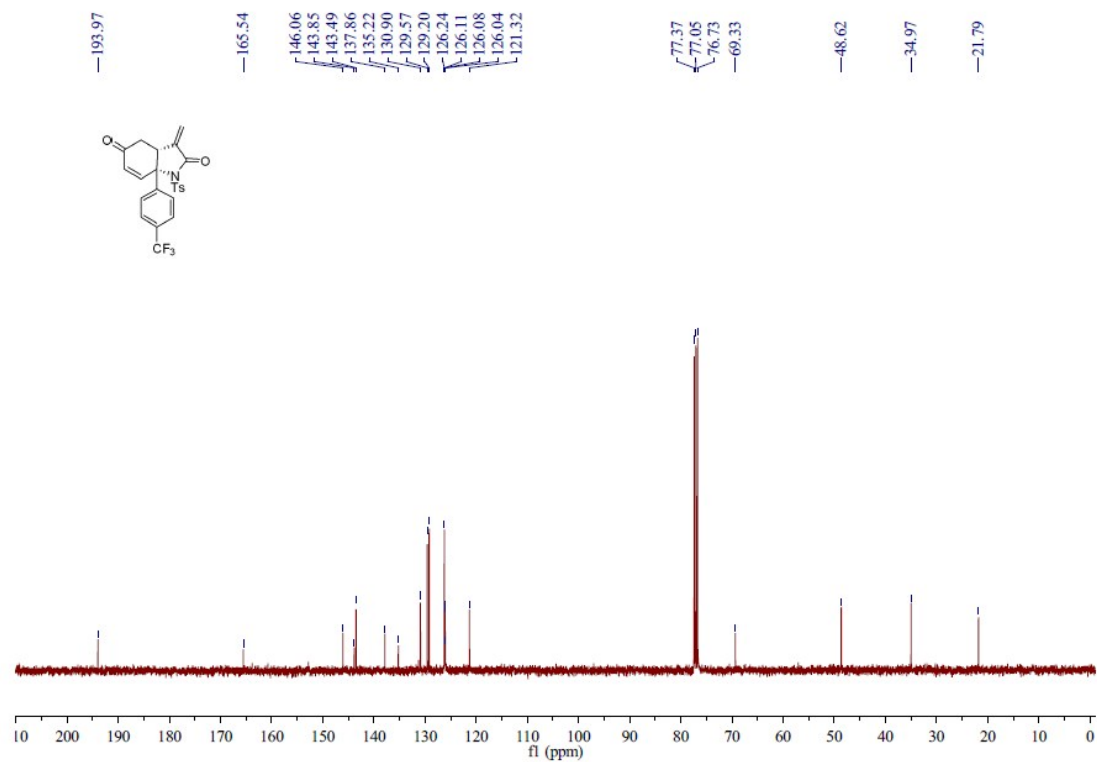

<sup>13</sup>C NMR spectra of **2f**

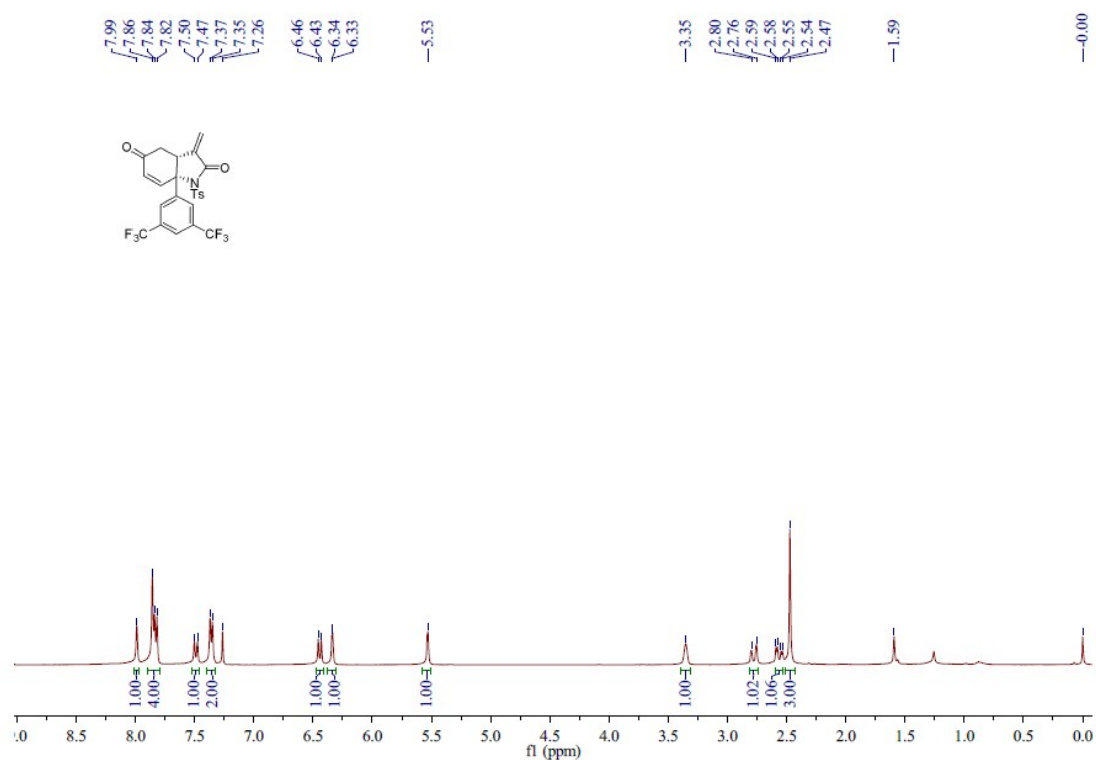

<sup>1</sup>H NMR spectra of **2g**

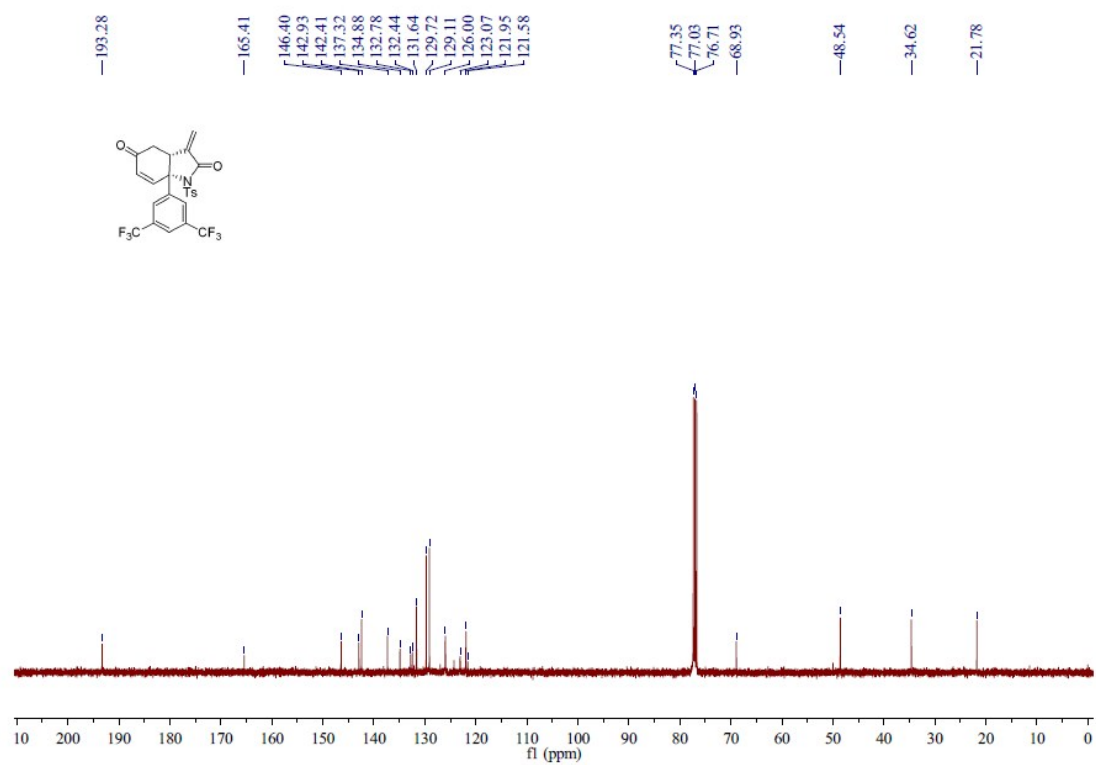

<sup>13</sup>C NMR spectra of **2g**

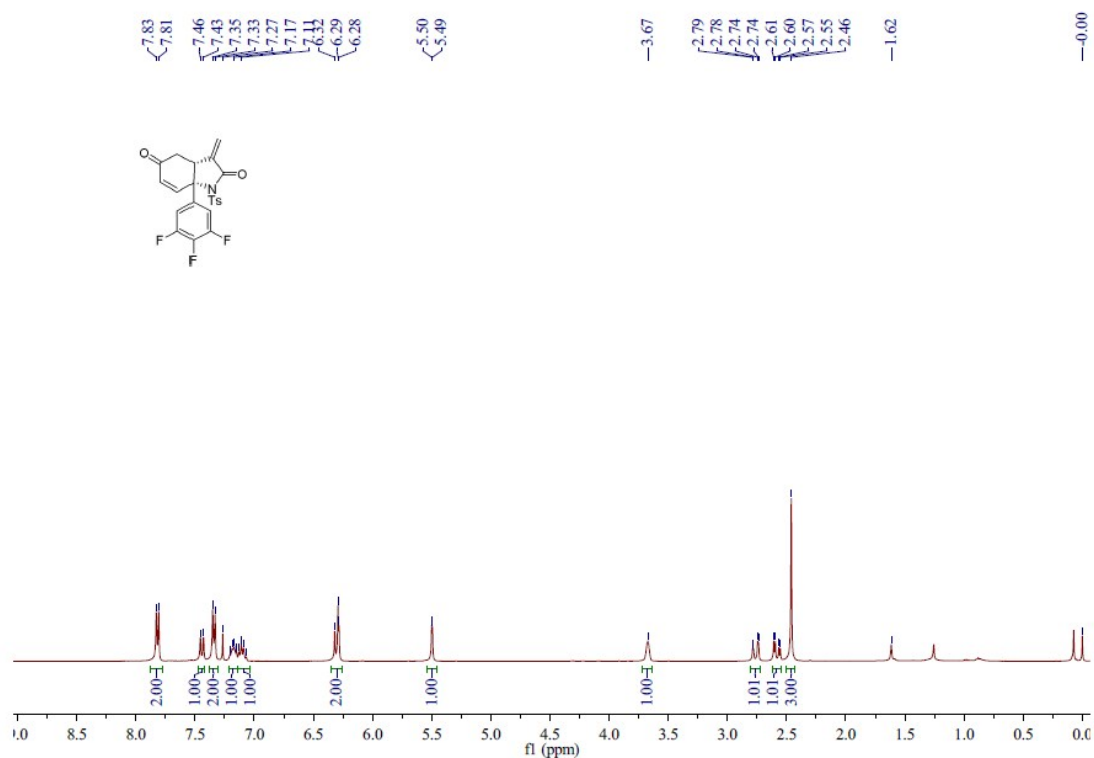

$^1\text{H}$  NMR spectra of **2h**

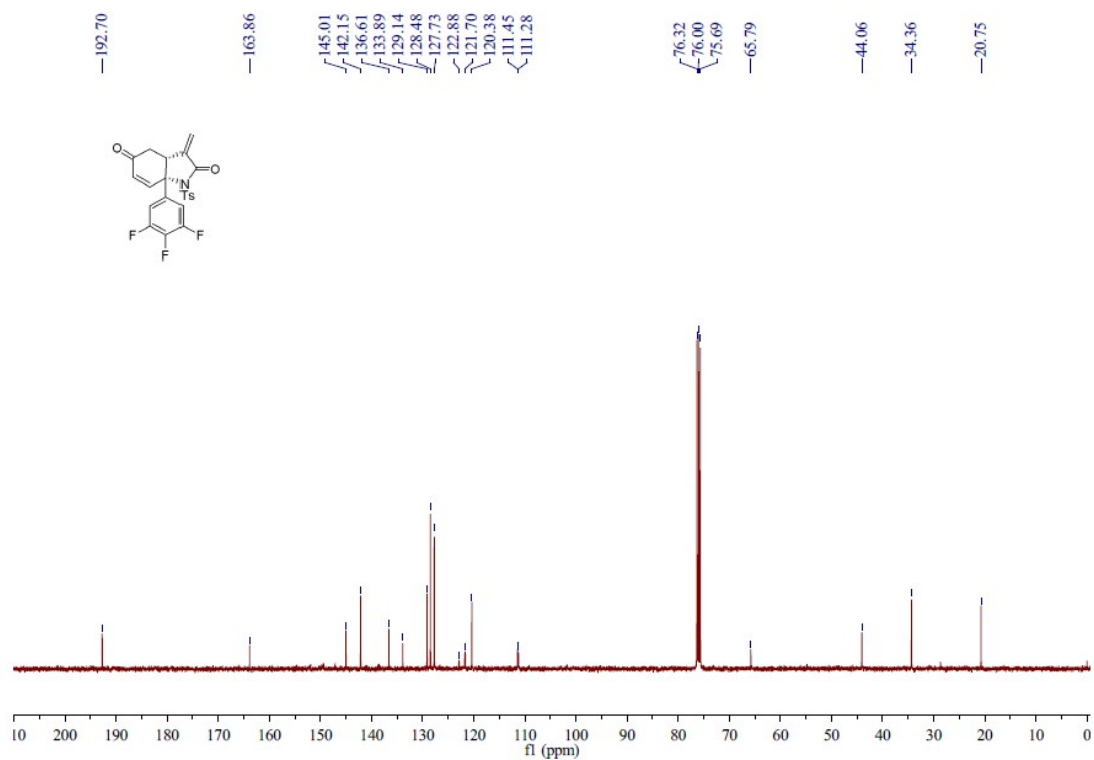

$^{13}\text{C}$  NMR spectra of **2h**

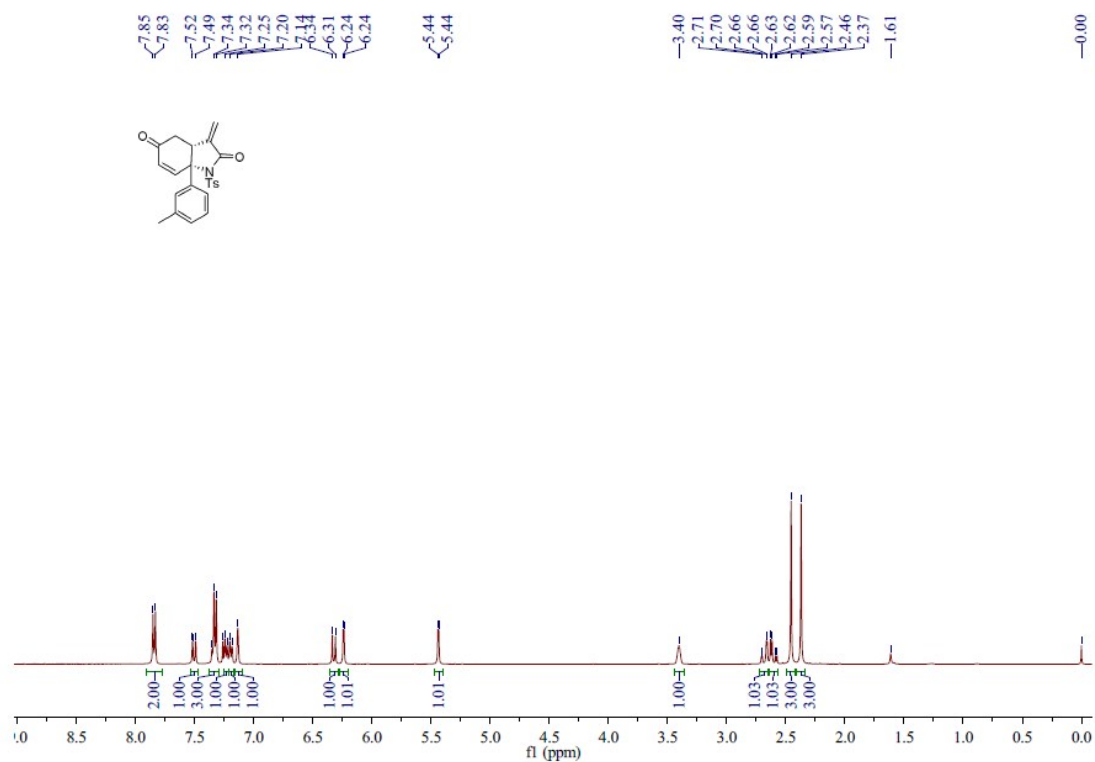

<sup>1</sup>H NMR spectra of **2i**

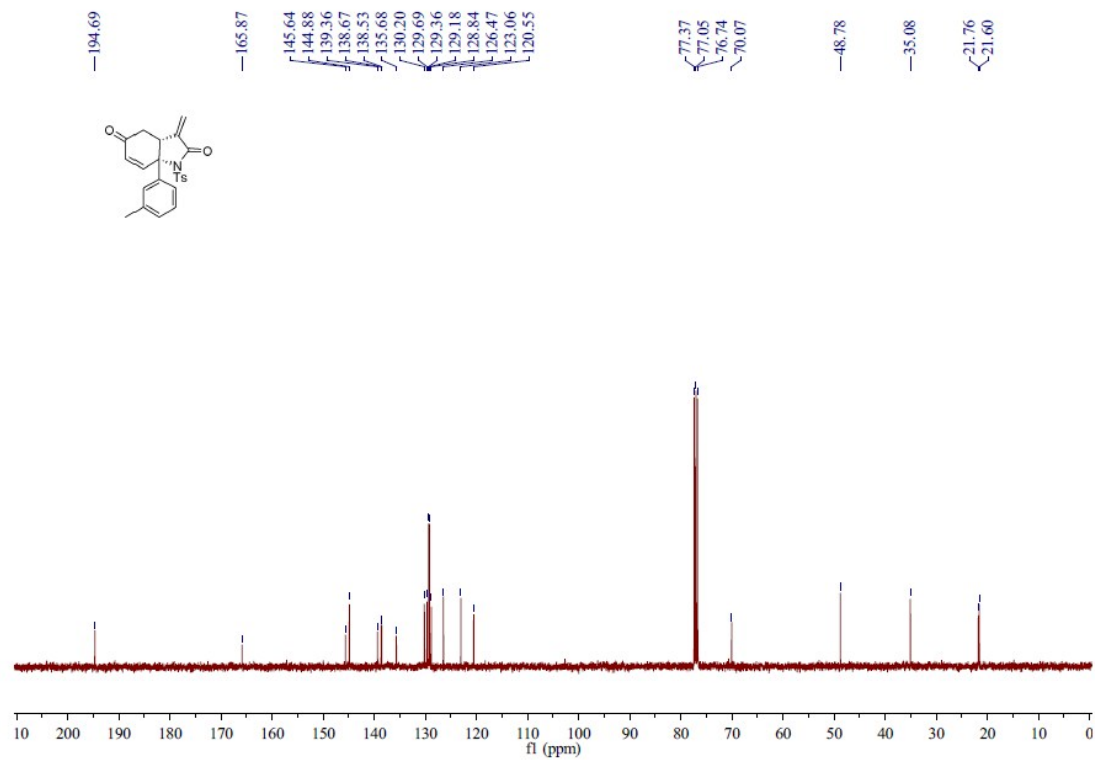

<sup>13</sup>C NMR spectra of **2i**



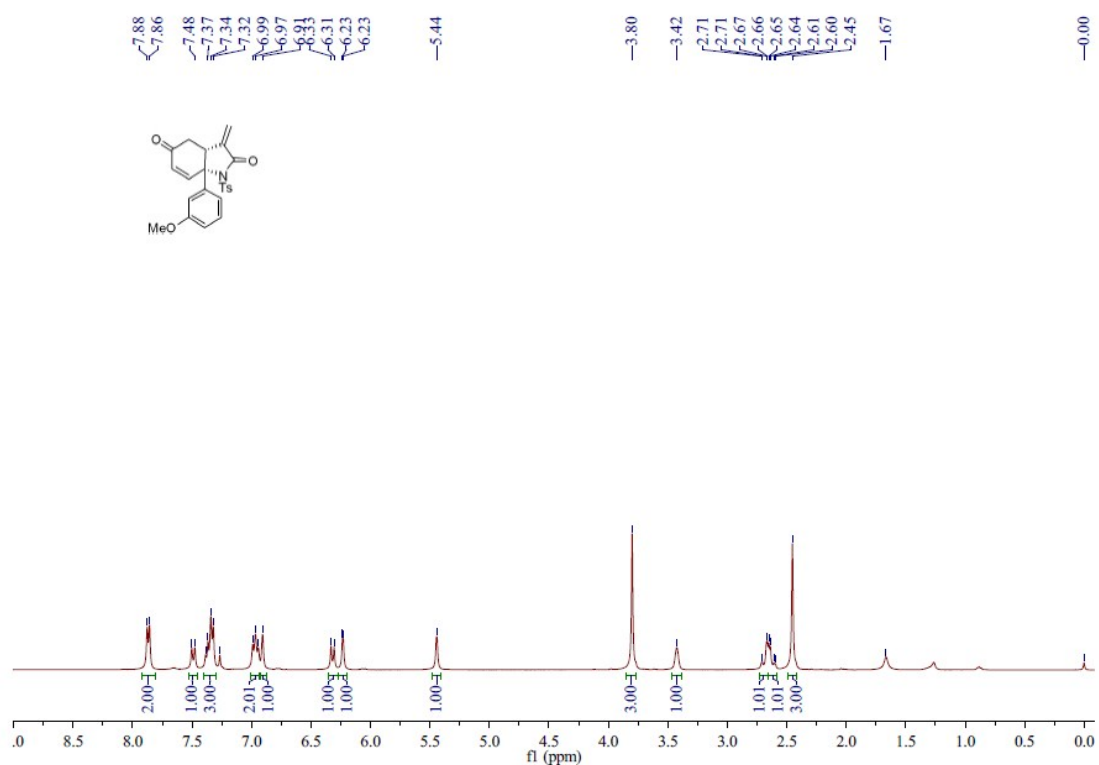

<sup>1</sup>H NMR spectra of **2j**

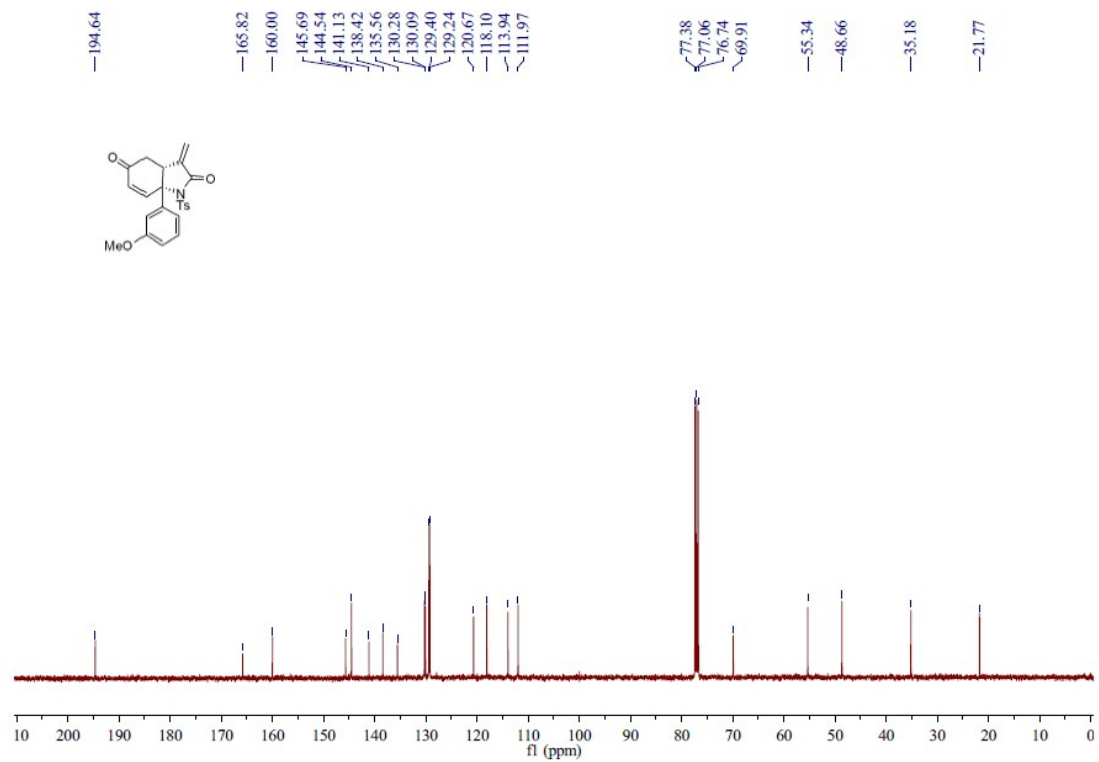

<sup>13</sup>C NMR spectra of **2j**

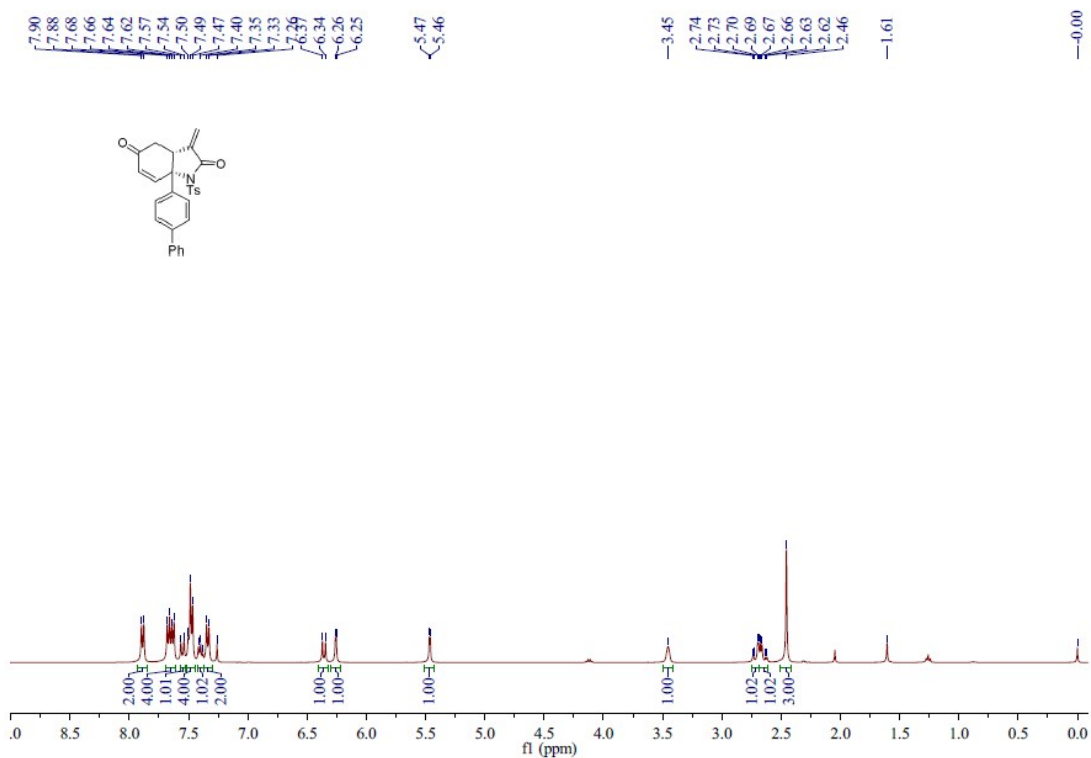

<sup>1</sup>H NMR spectra of **2k**

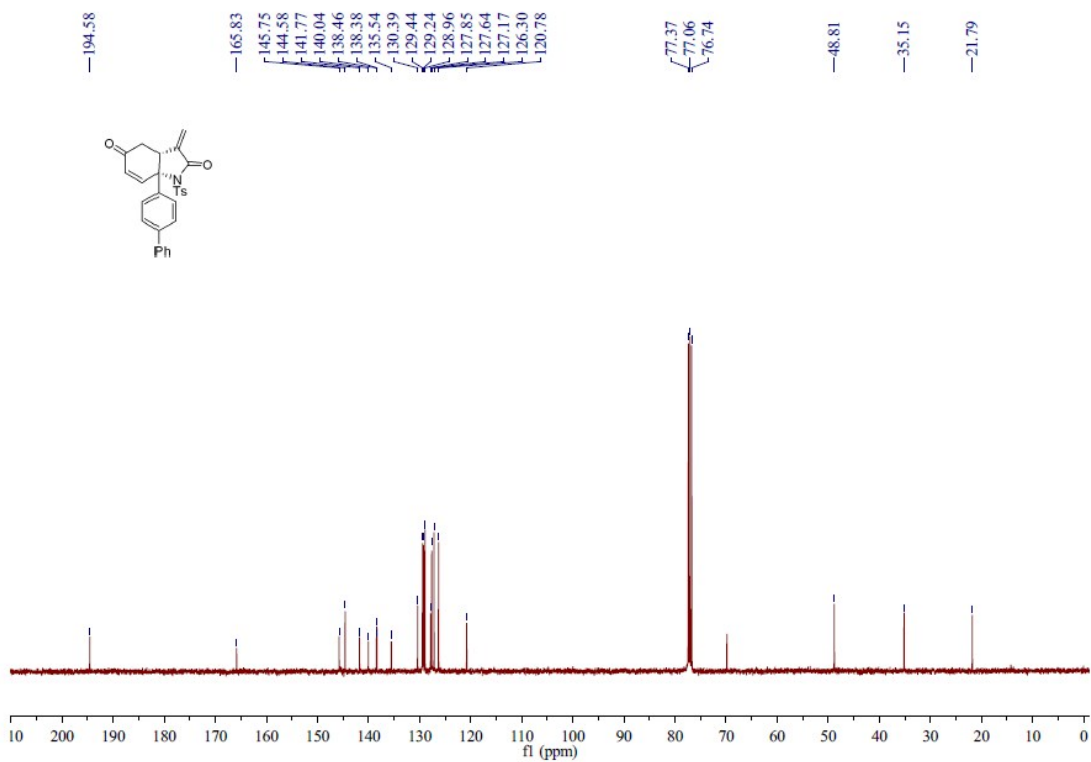

<sup>13</sup>C NMR spectra of **2k**

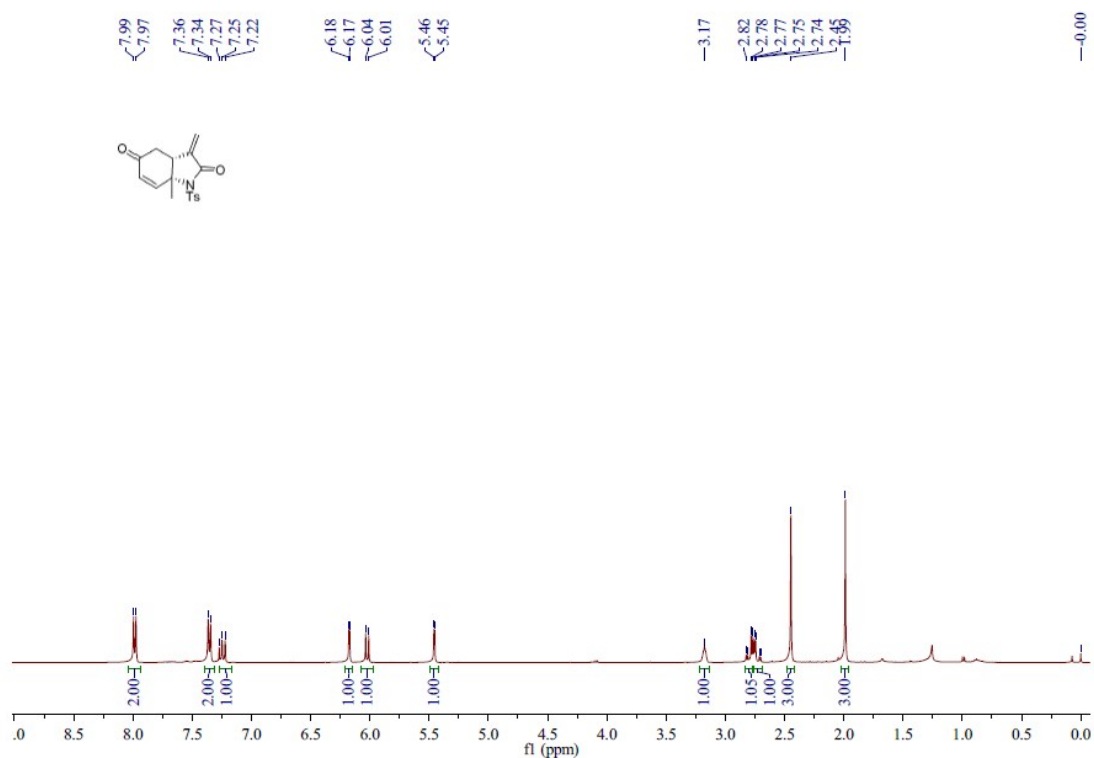

<sup>1</sup>H NMR spectra of **21**

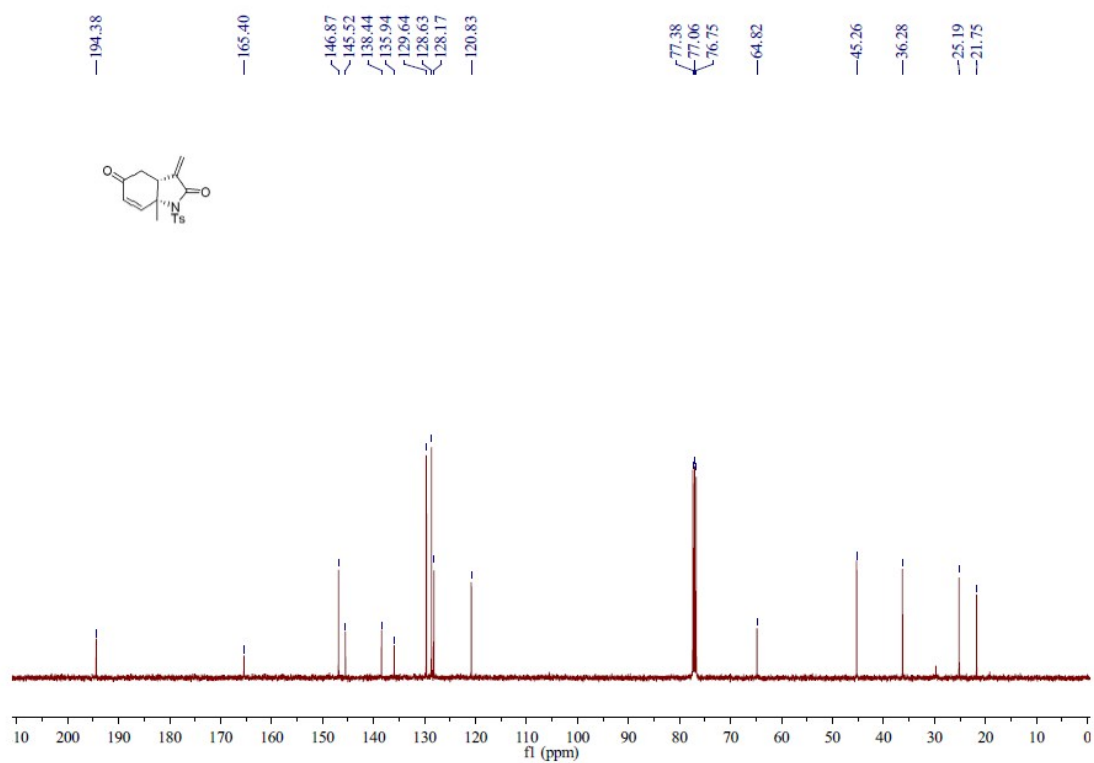

<sup>13</sup>C NMR spectra of **21**

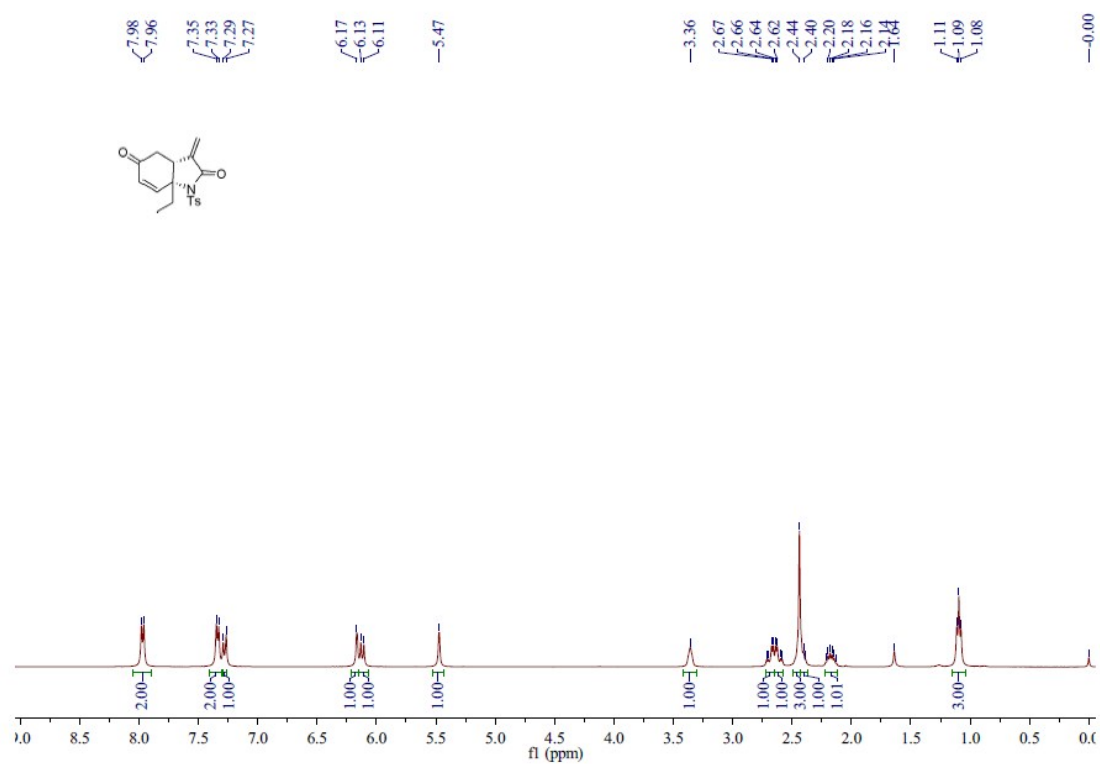

<sup>1</sup>H NMR spectra of **2m**

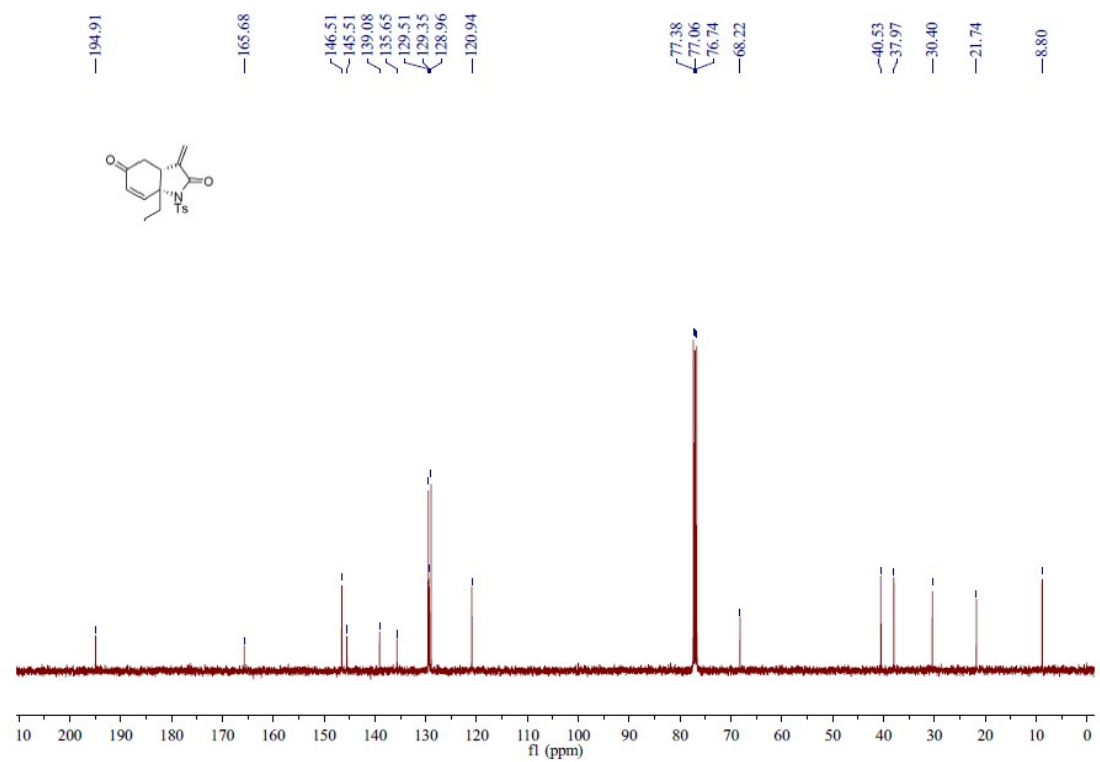

<sup>13</sup>C NMR spectra of **2m**

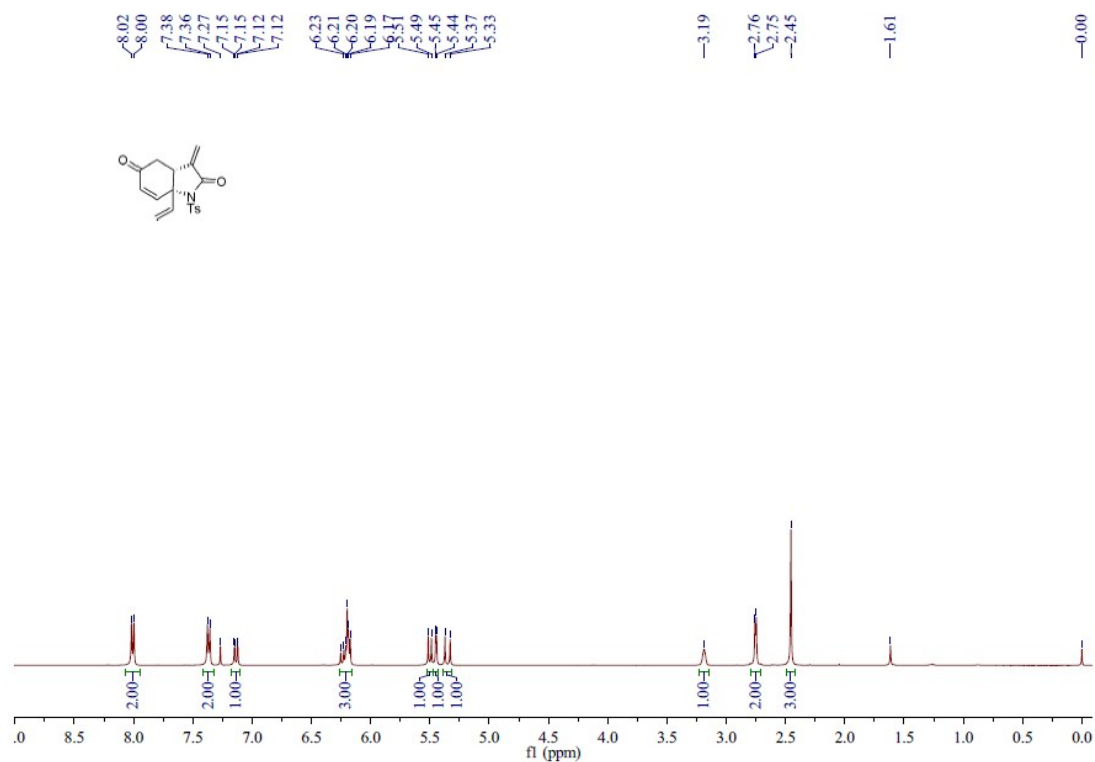

<sup>1</sup>H NMR spectra of **2n**

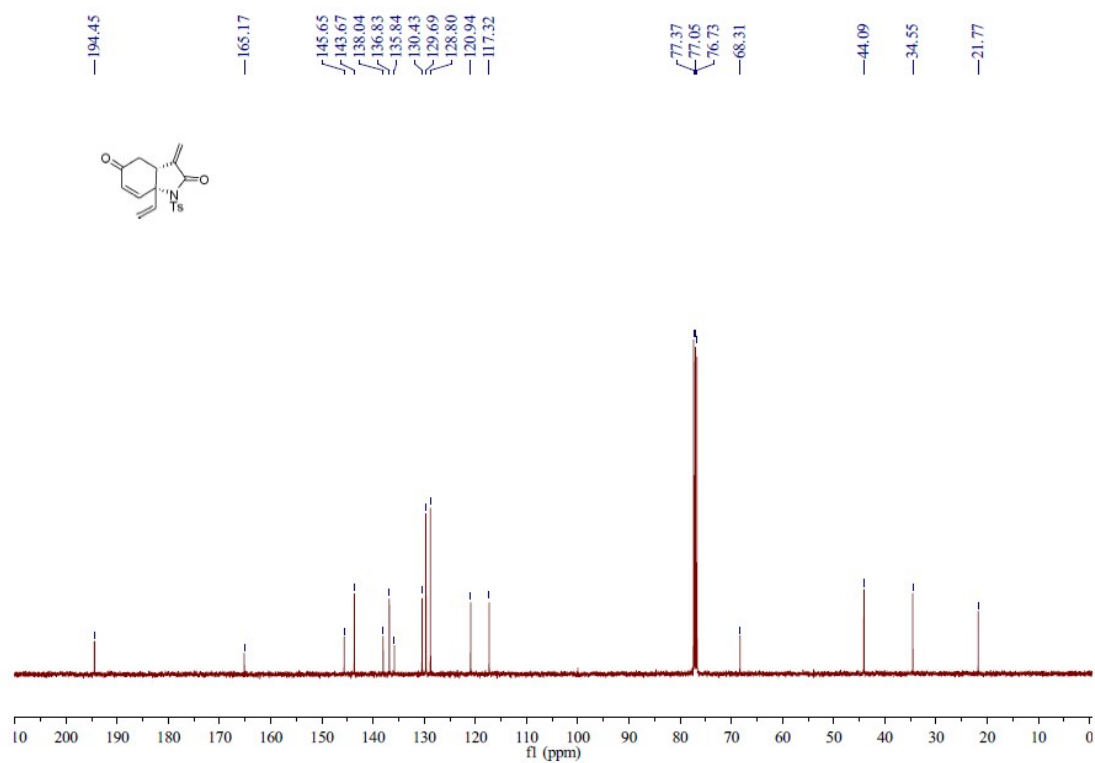

<sup>13</sup>C NMR spectra of **2n**

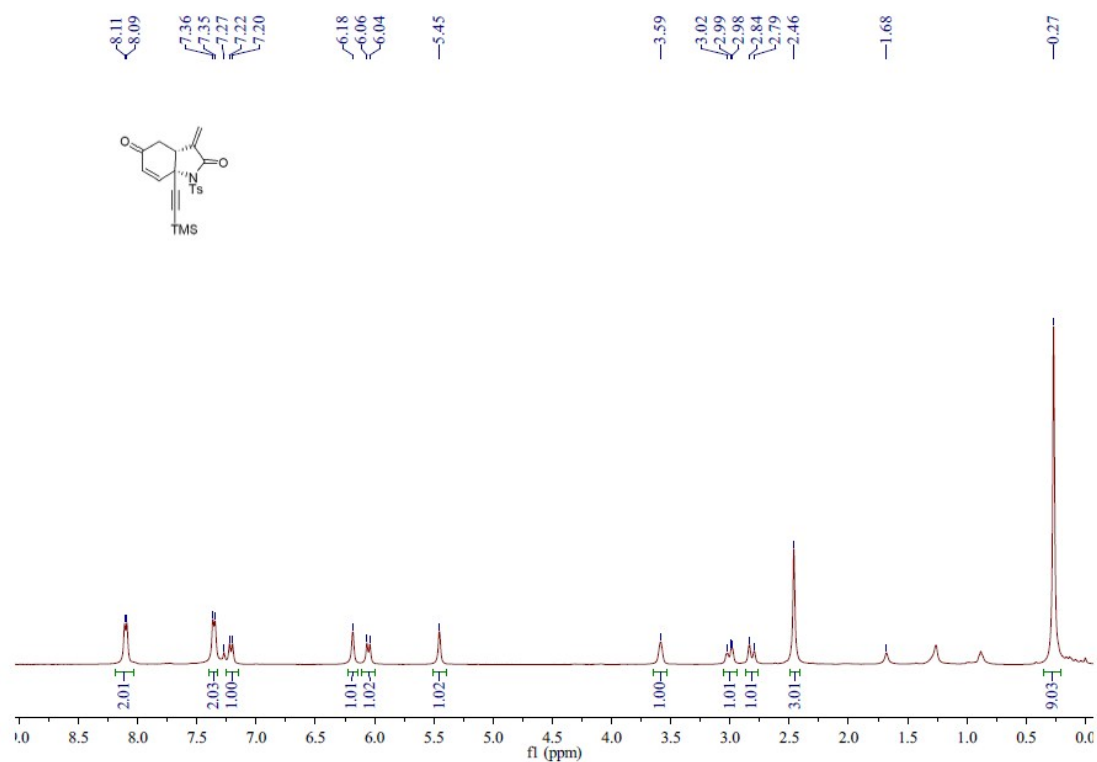

<sup>1</sup>H NMR spectra of **2o**

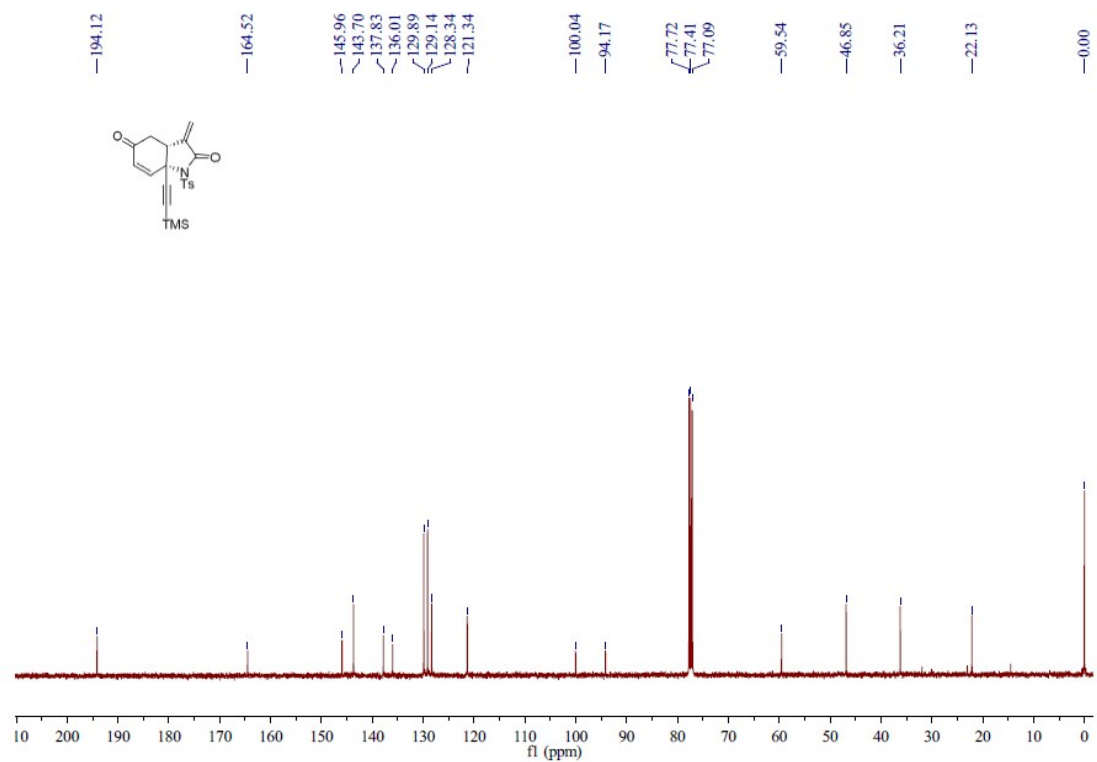

<sup>13</sup>C NMR spectra of **2o**

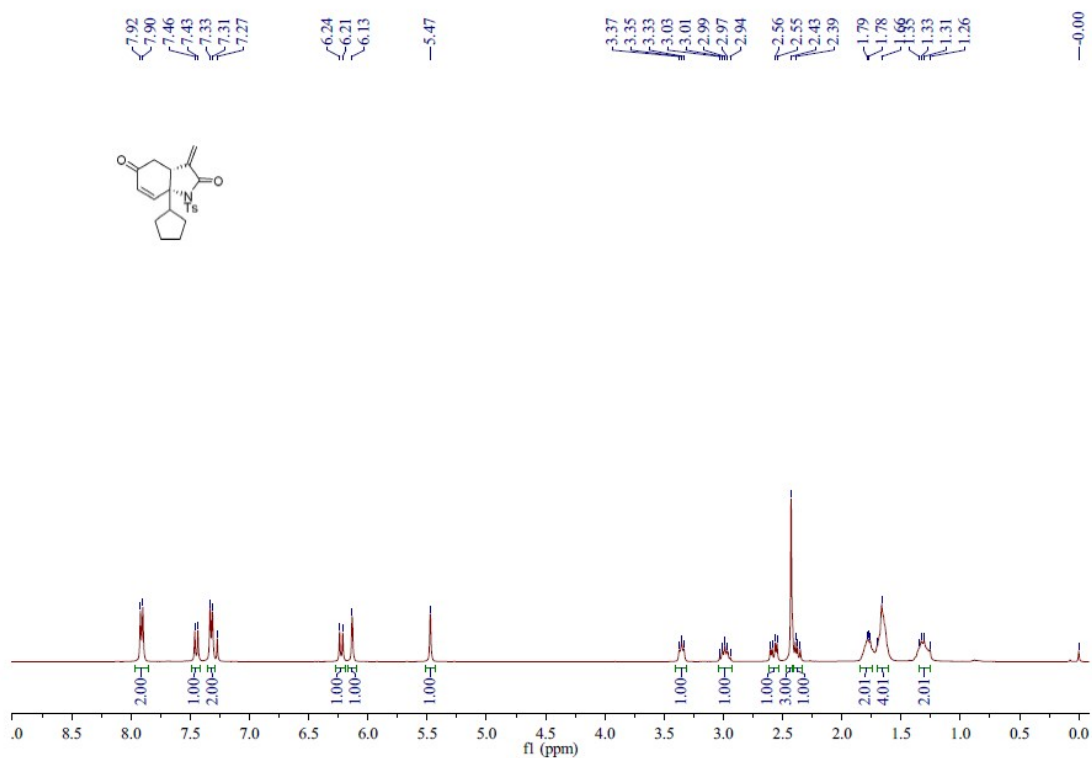

<sup>1</sup>H NMR spectra of **2p**

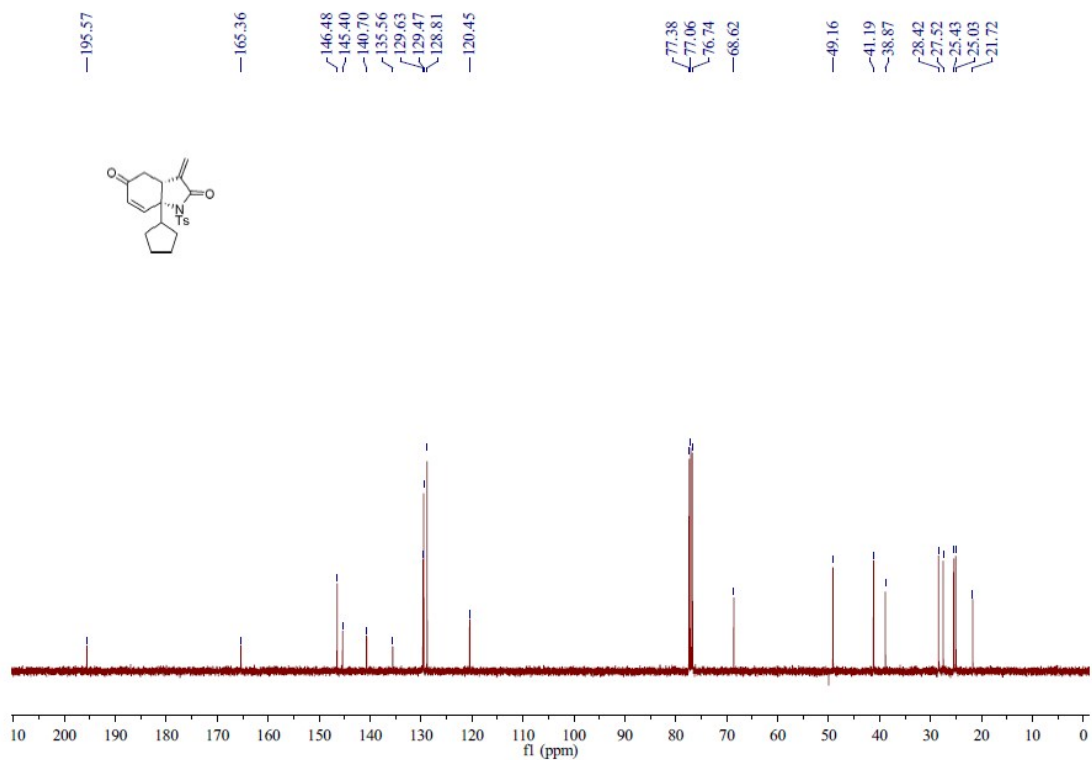

<sup>13</sup>C NMR spectra of **2p**

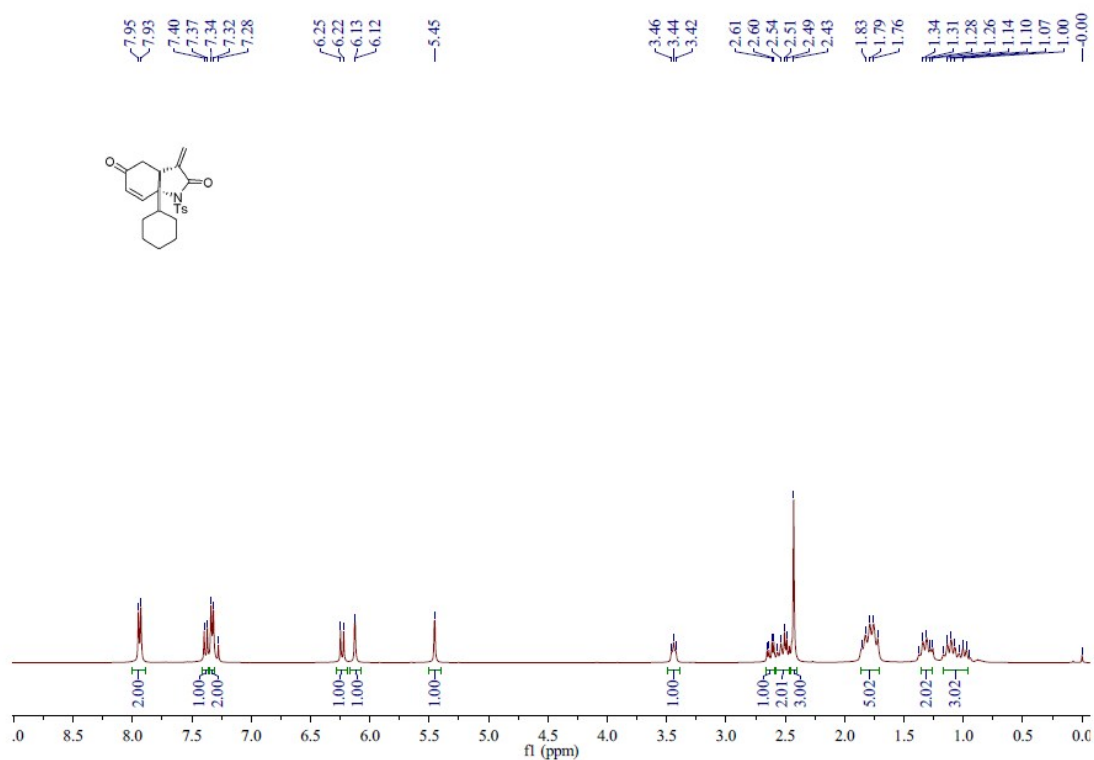

$^1\text{H}$  NMR spectra of **2q**

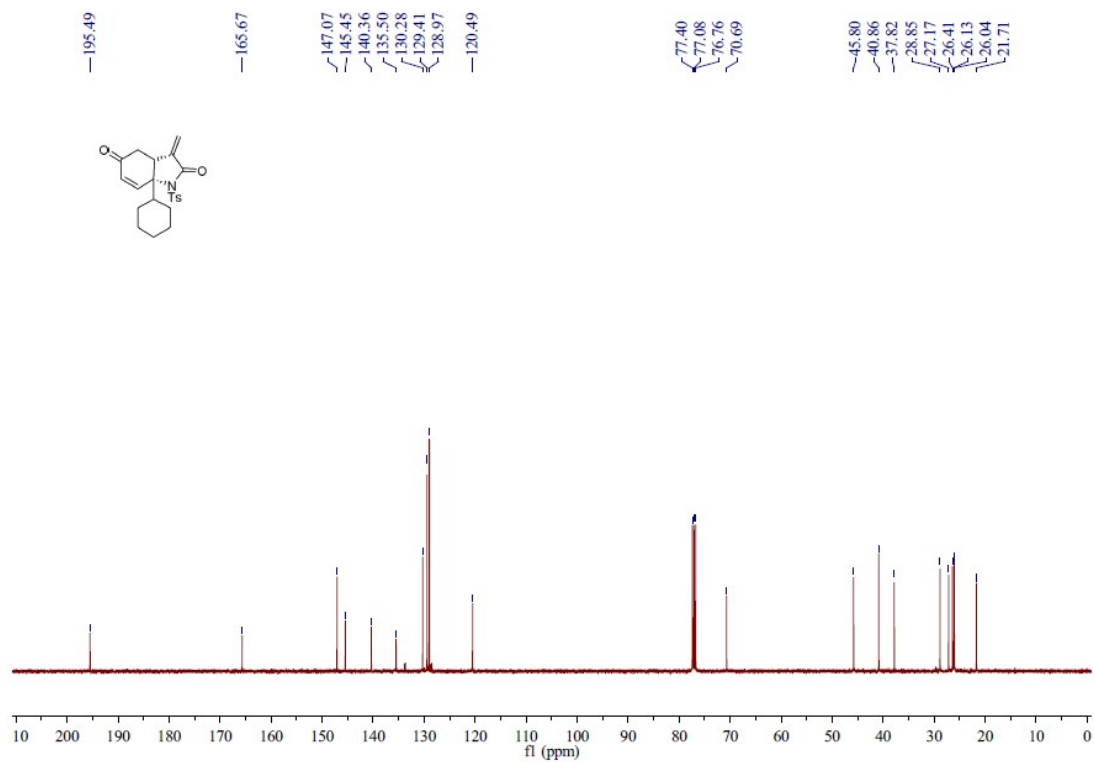

$^{13}\text{C}$  NMR spectra of **2q**



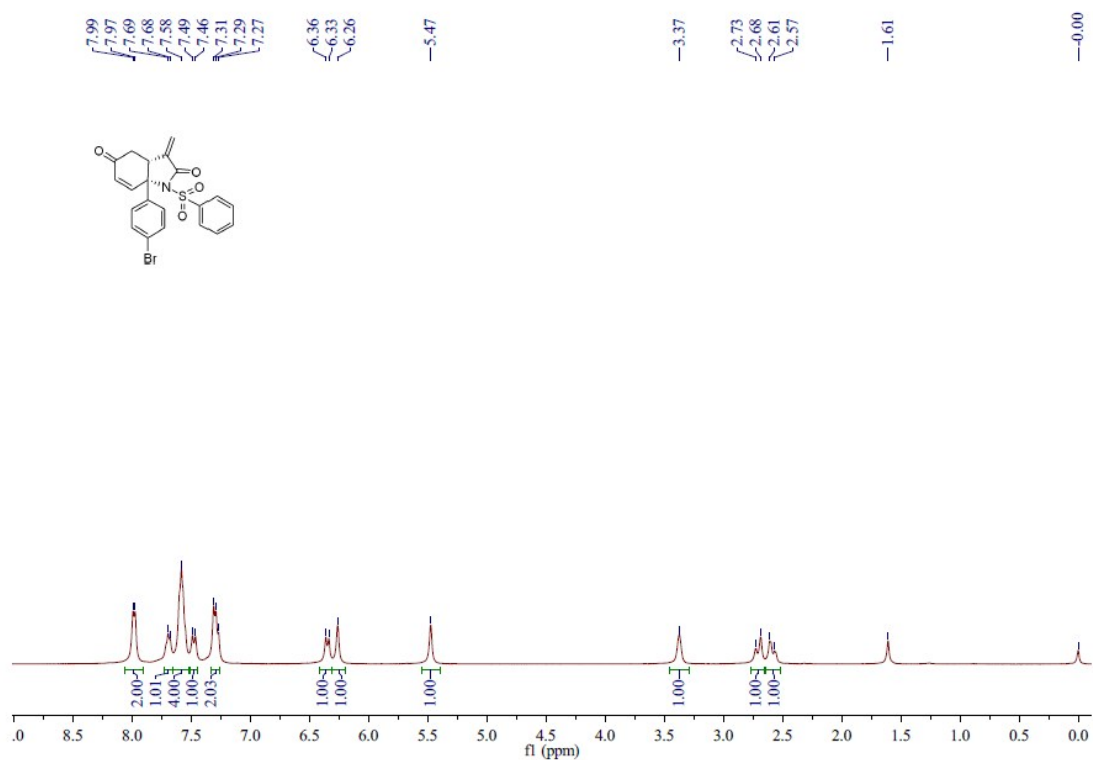

<sup>1</sup>H NMR spectra of **2r**

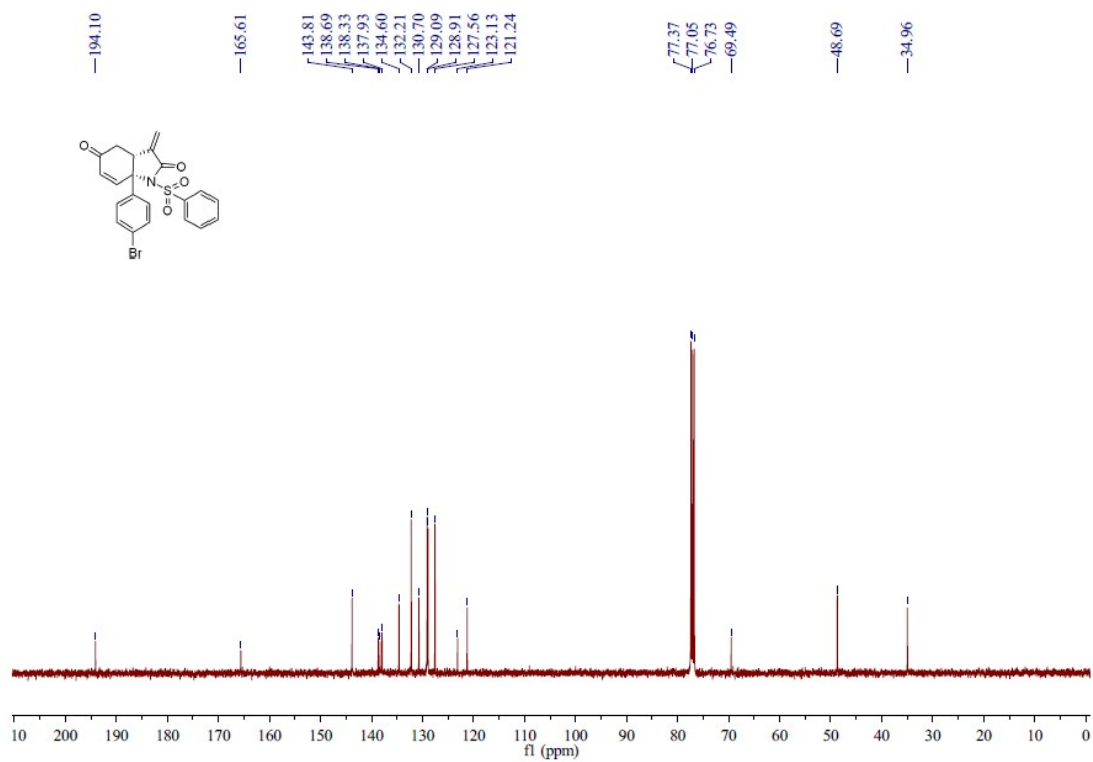

<sup>13</sup>C NMR spectra of **2r**

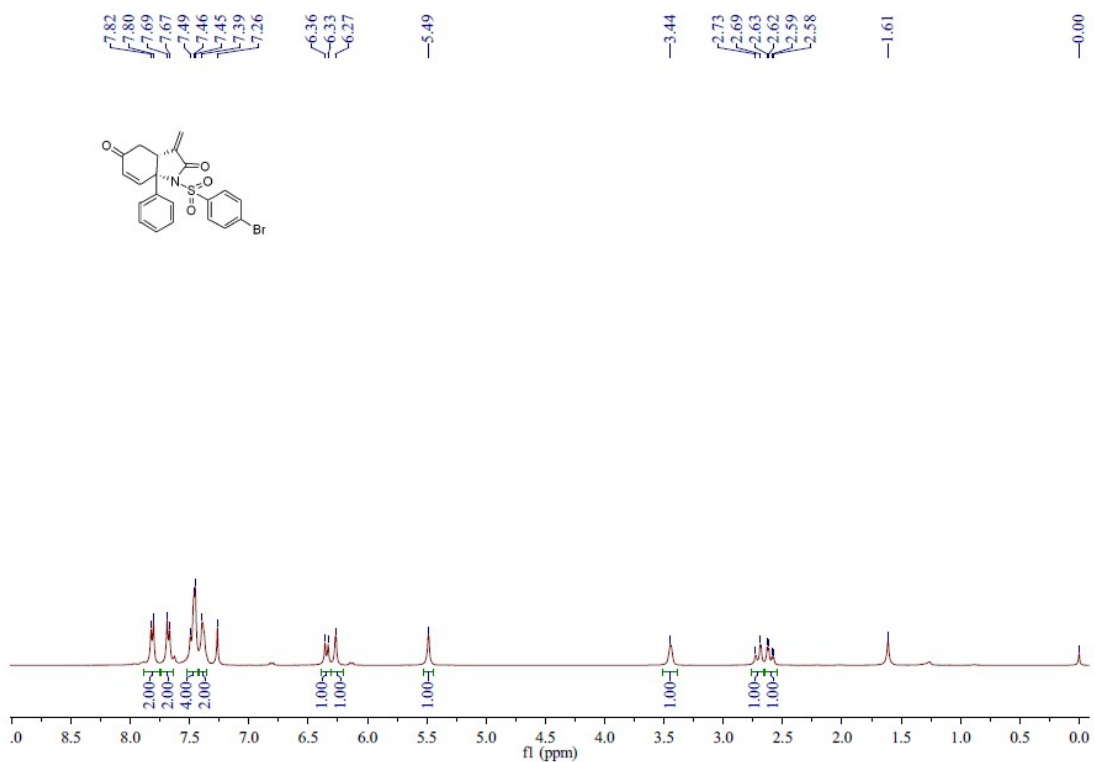

<sup>1</sup>H NMR spectra of **2s**

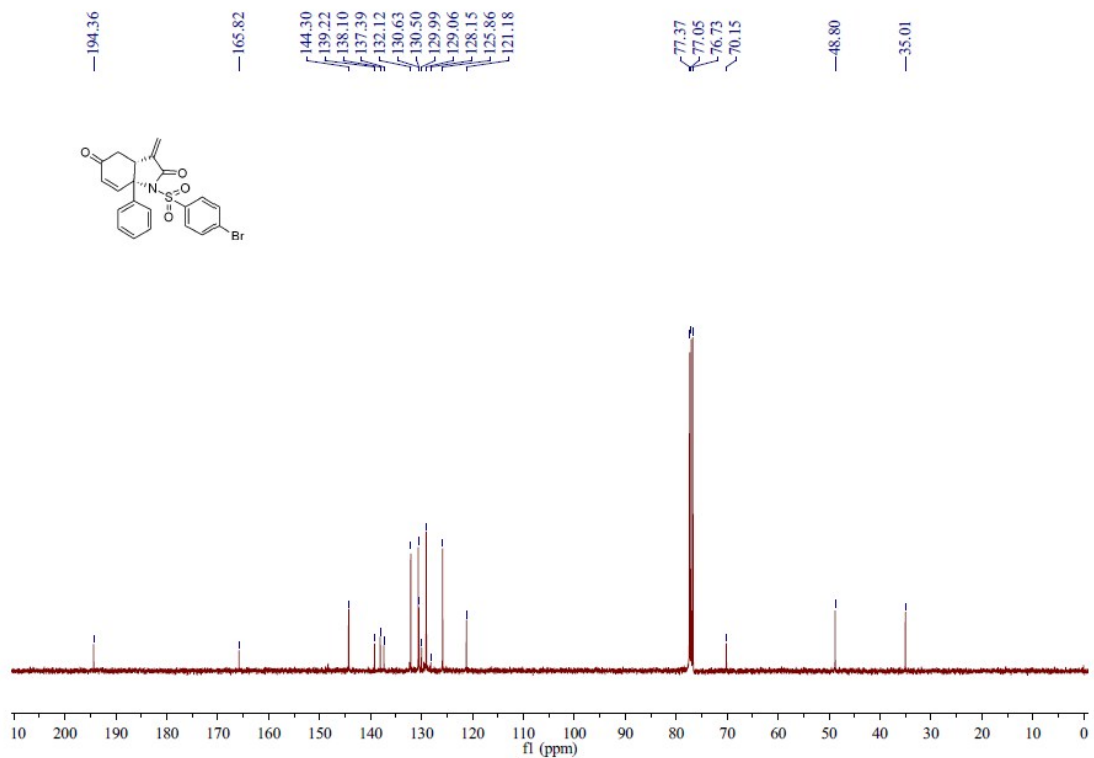

<sup>13</sup>C NMR spectra of **2s**

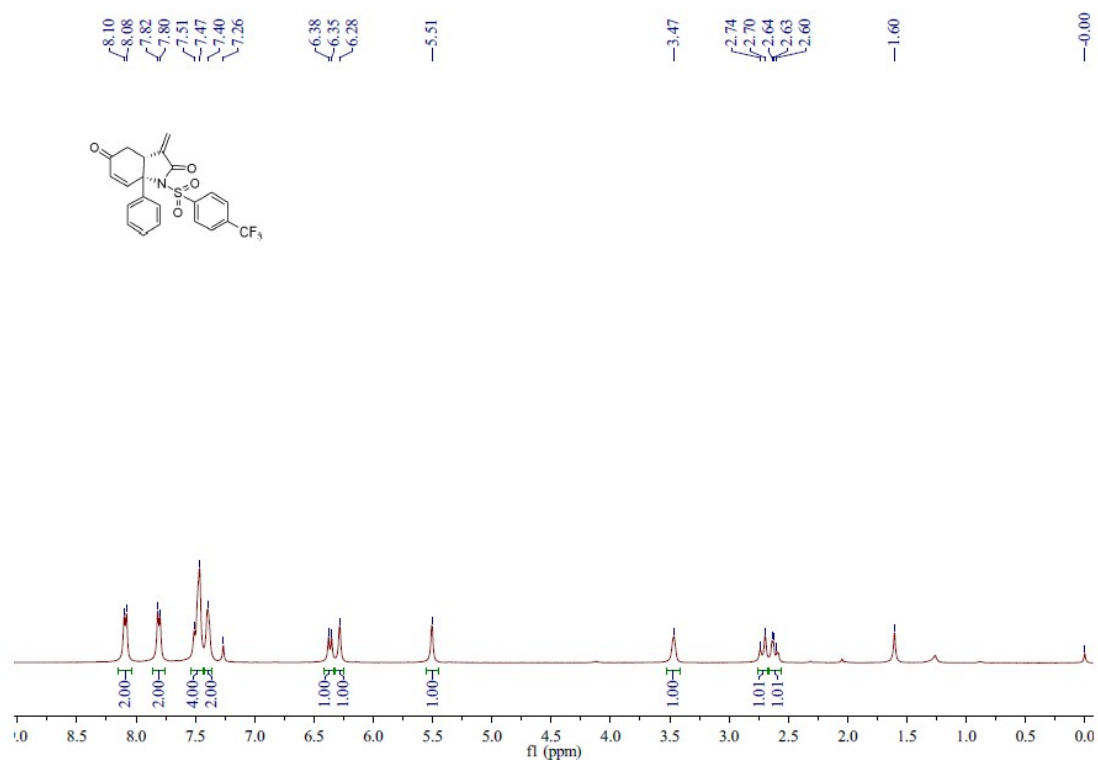

**<sup>1</sup>H NMR spectra of 2t**

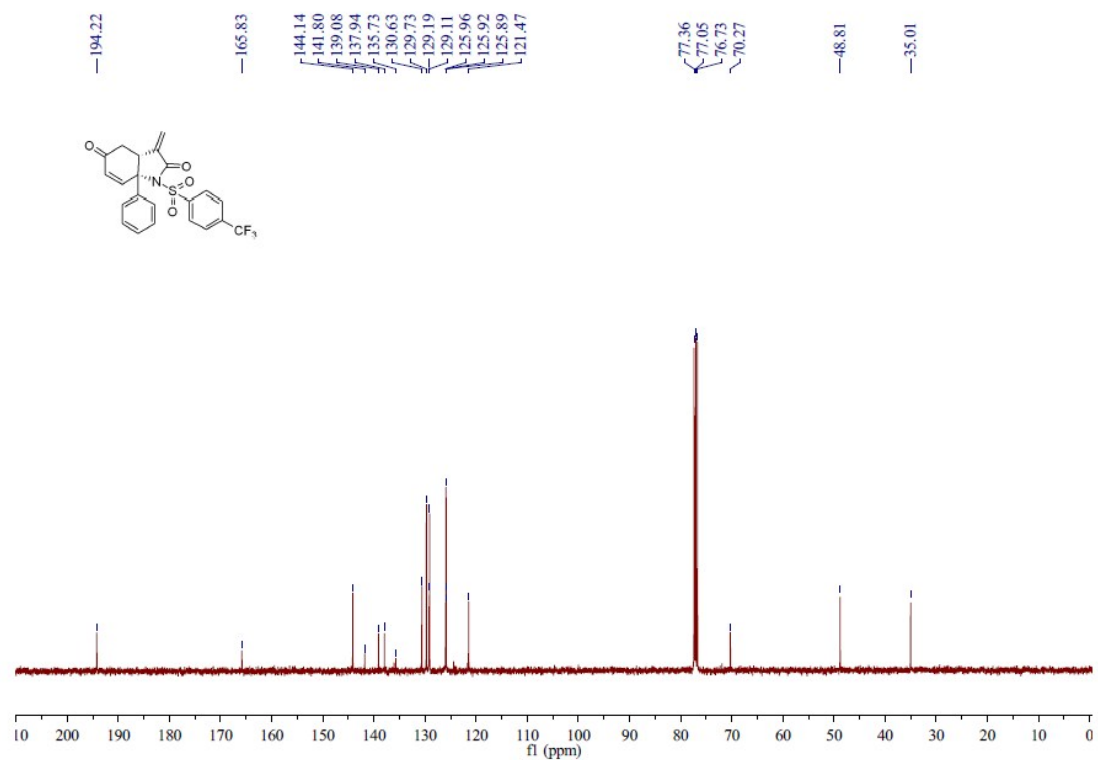

**<sup>13</sup>C NMR spectra of 2t**

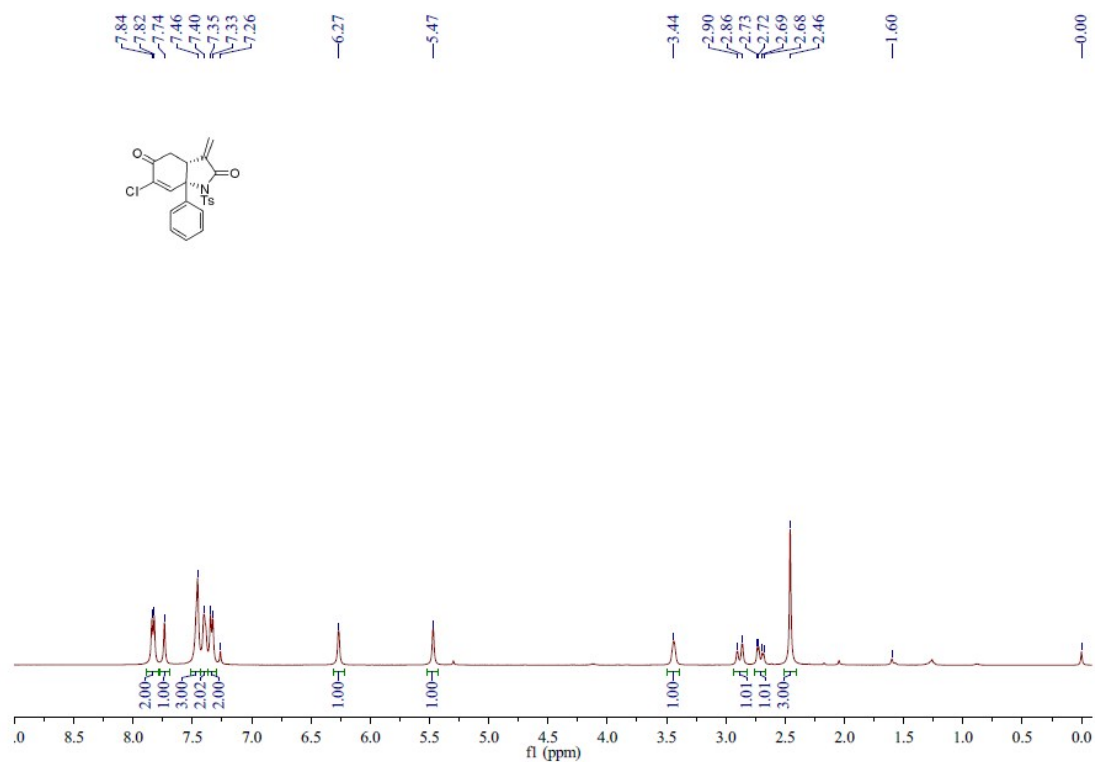

<sup>1</sup>H NMR spectra of **2u**

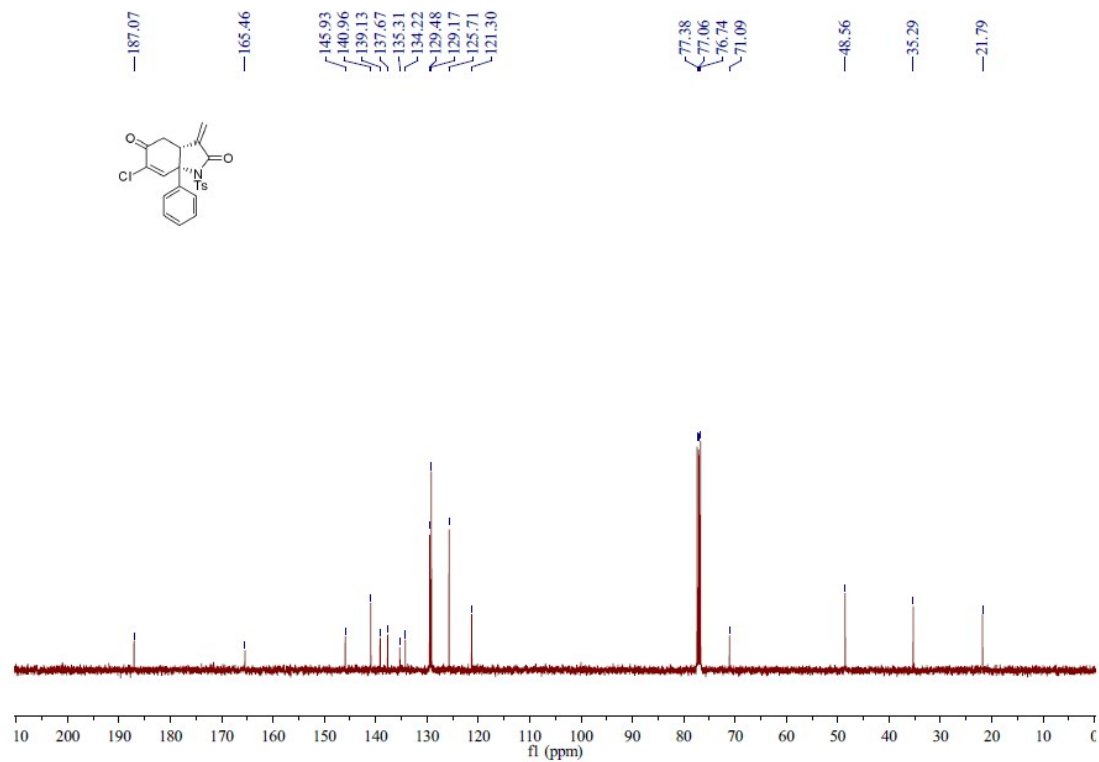

<sup>13</sup>C NMR spectra of **2u**

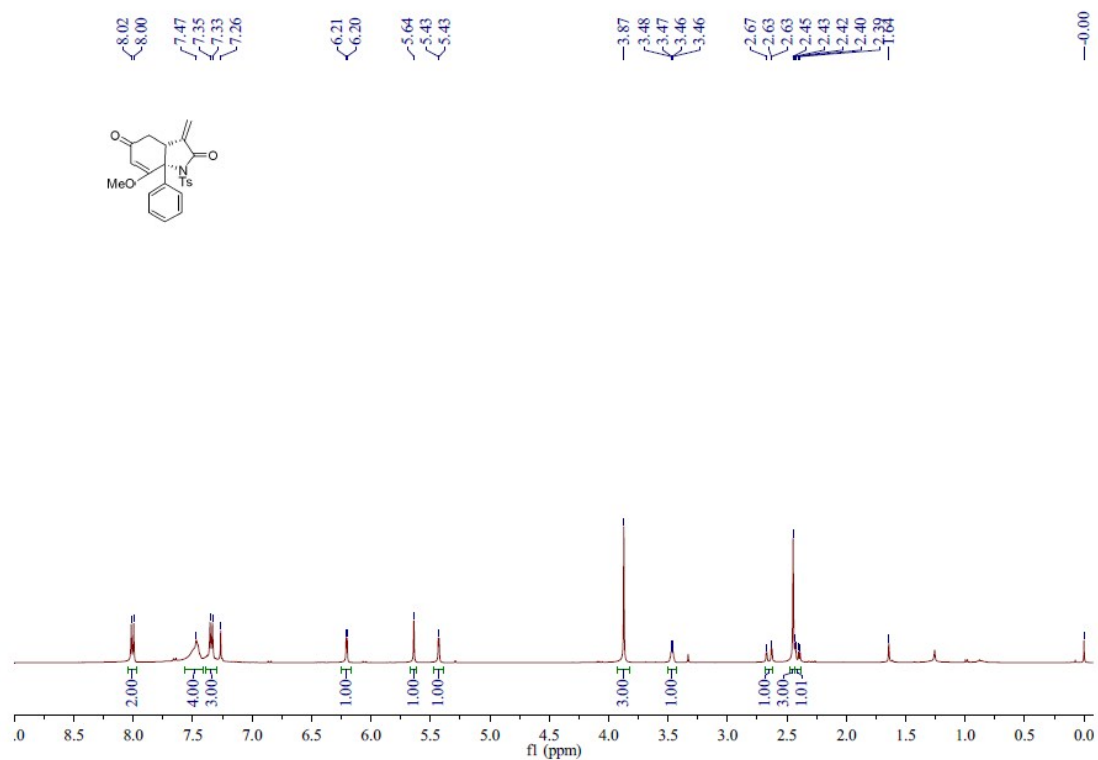

$^1\text{H}$  NMR spectra of **2v**

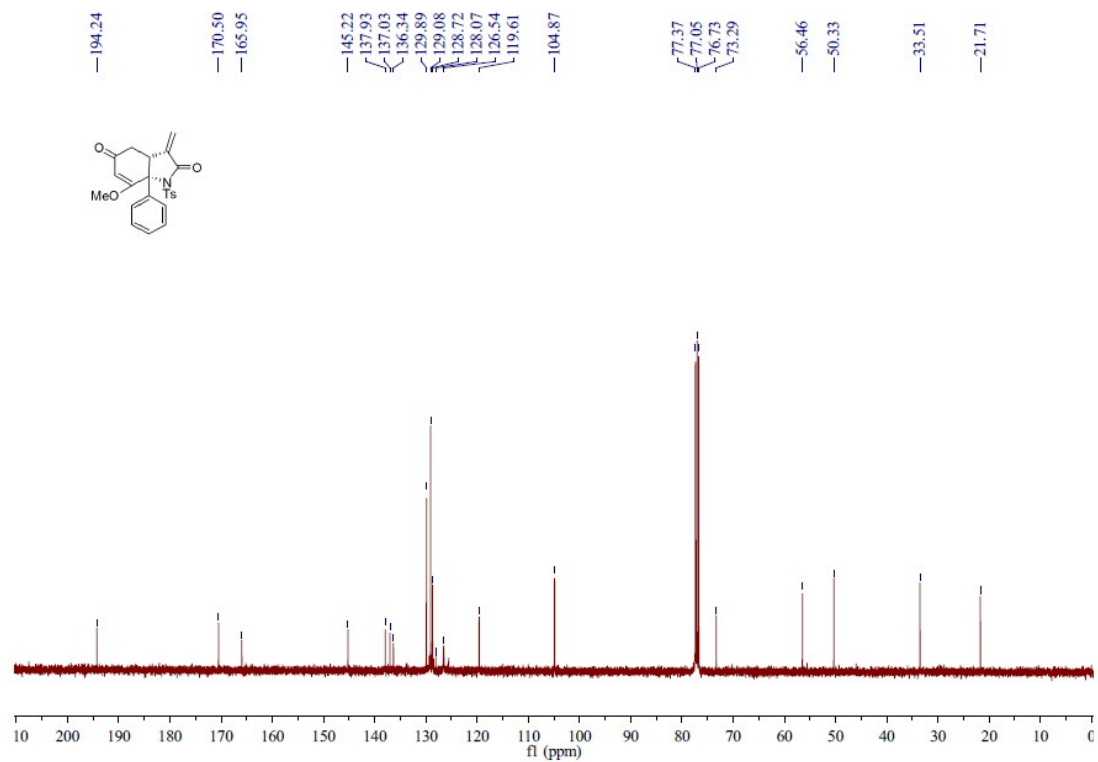

$^{13}\text{C}$  NMR spectra of **2v**

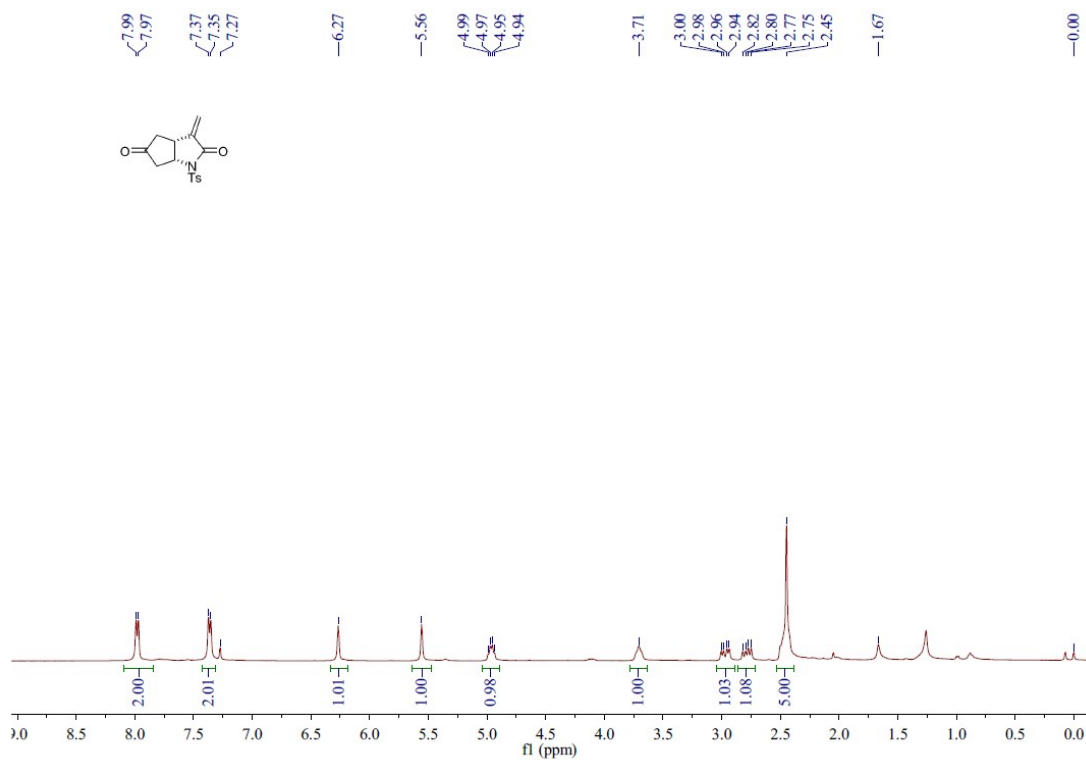

<sup>1</sup>H NMR spectra of **2w**

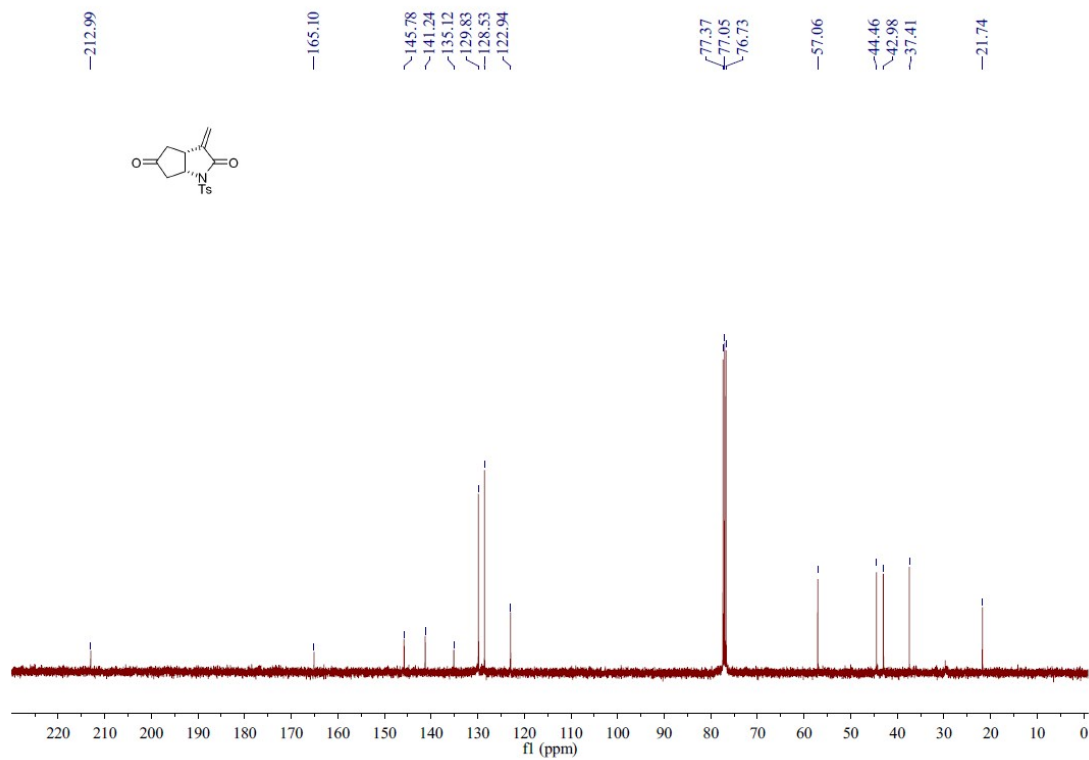

<sup>13</sup>C NMR spectra of **2w**

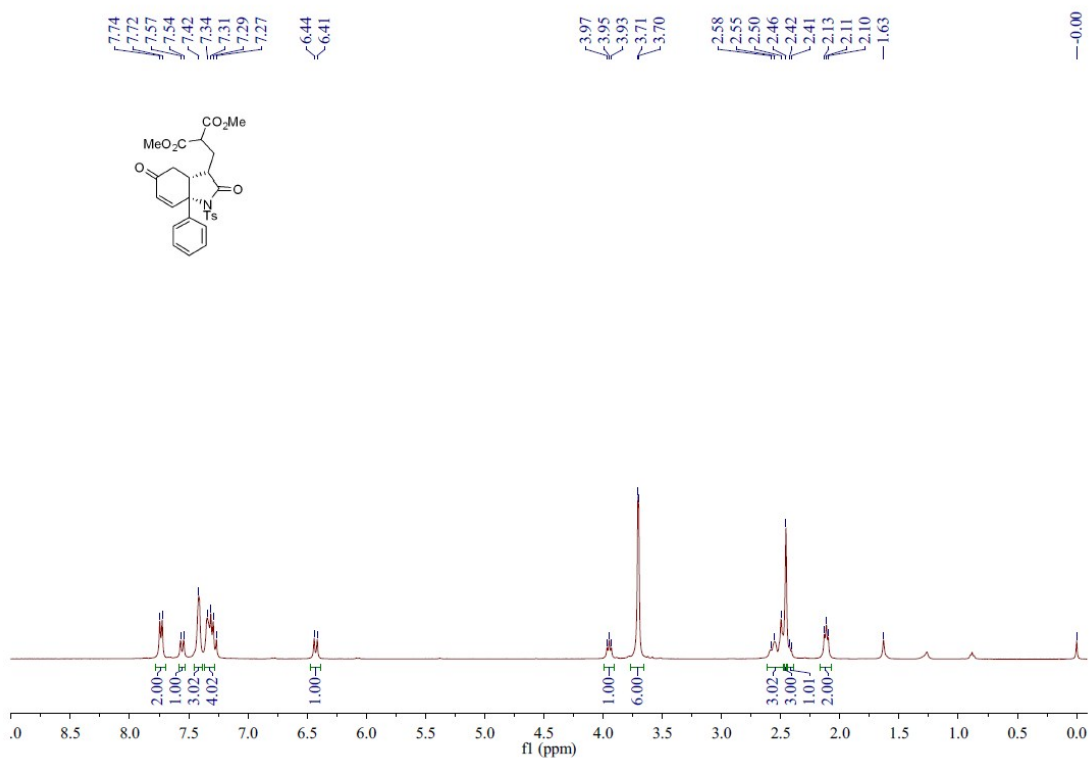

<sup>1</sup>H NMR spectra of **4a**

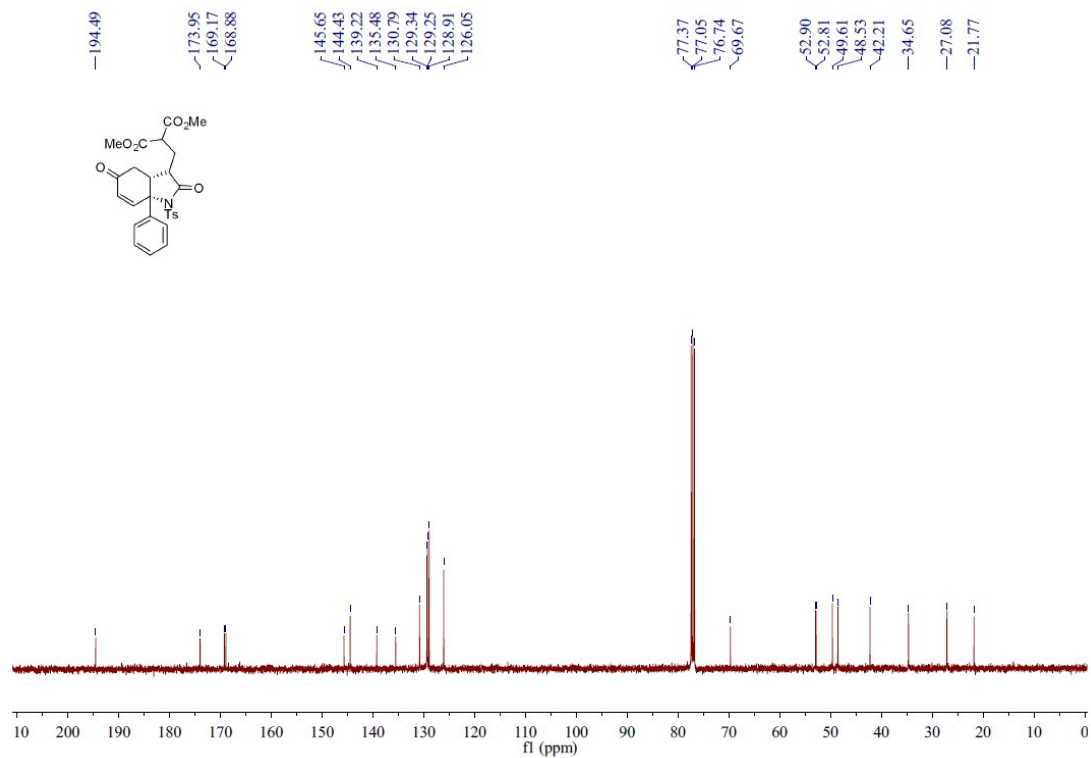

<sup>13</sup>C NMR spectra of **4a**

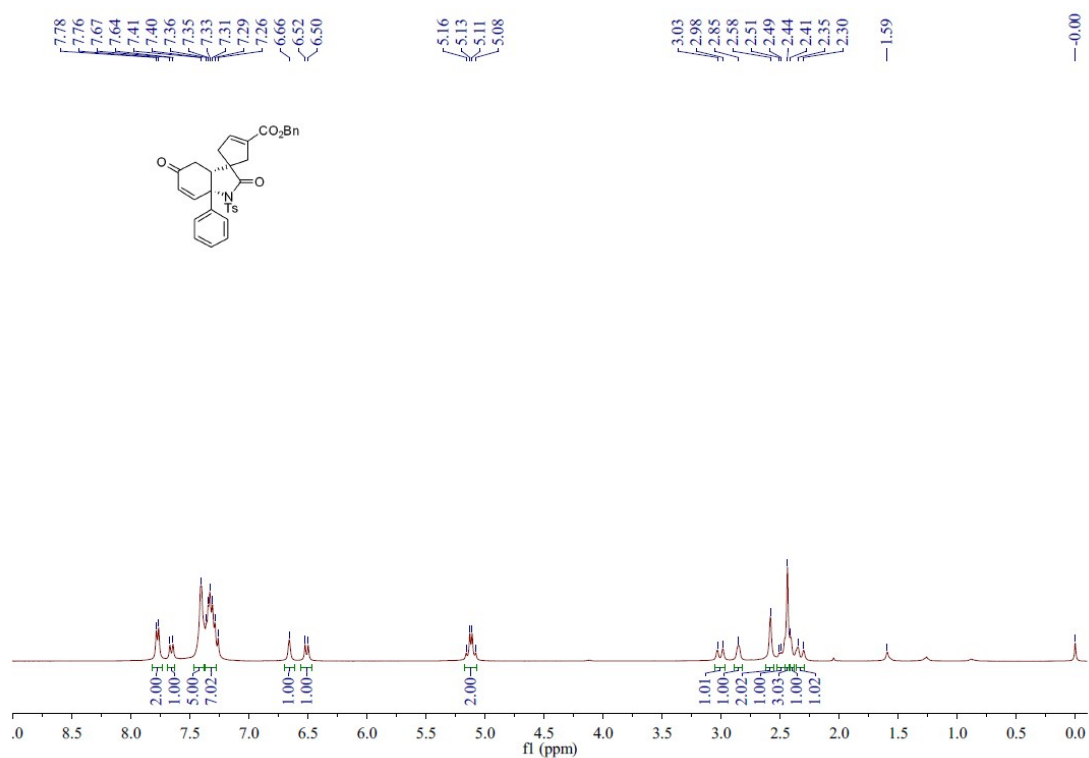

<sup>1</sup>H NMR spectra of **4b**

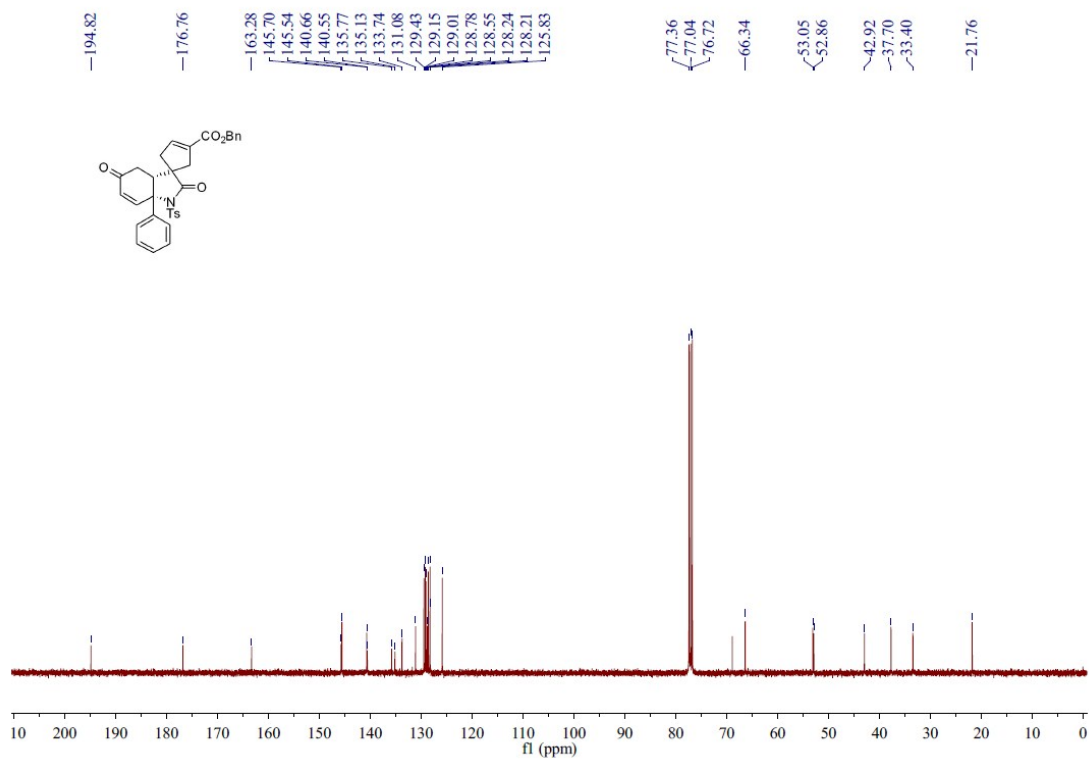

<sup>13</sup>C NMR spectra of **4b**



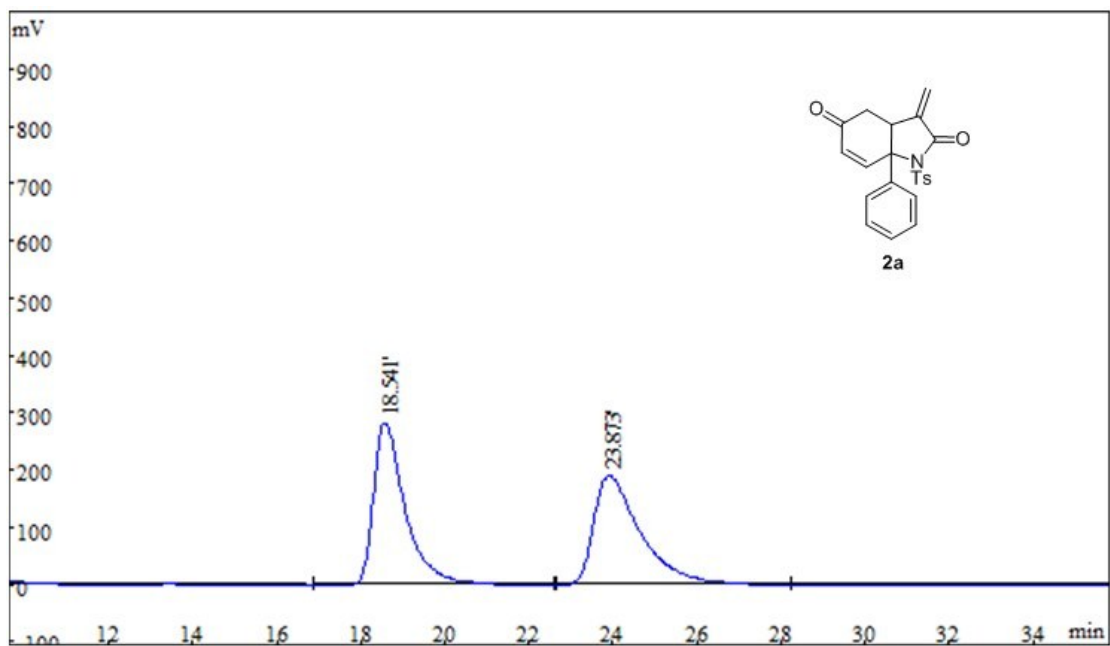

| Rank  | Time(min) | Area% | Area     |
|-------|-----------|-------|----------|
| 1     | 18.541    | 50.08 | 14816973 |
| 2     | 23.873    | 49.92 | 14767594 |
| Total |           | 100   | 29584567 |

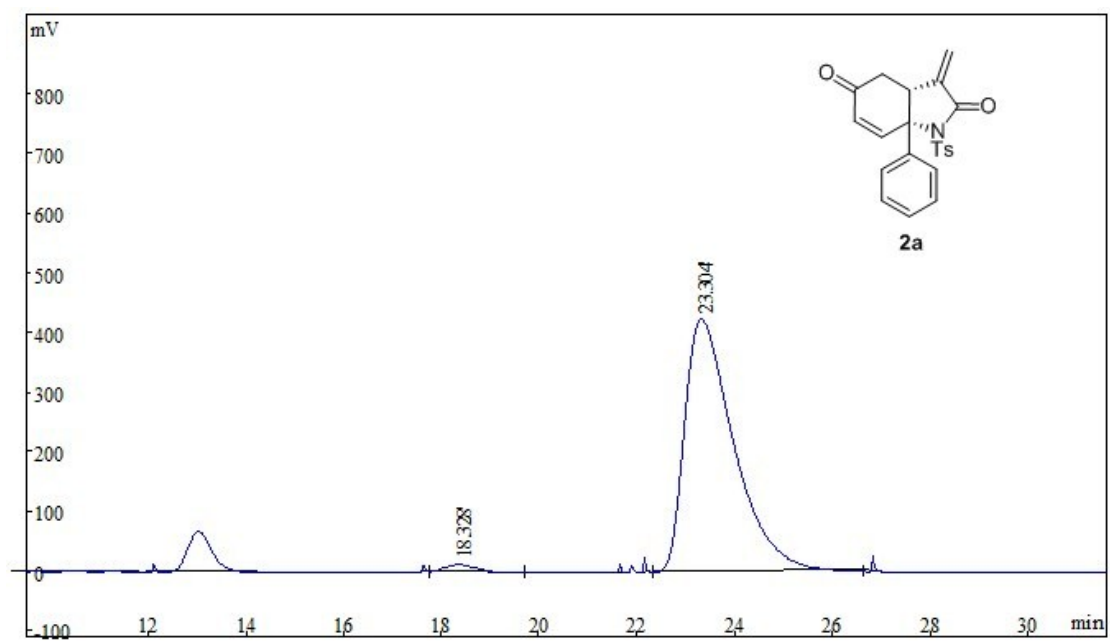

| Rank  | Time(min) | Area% | Area     |
|-------|-----------|-------|----------|
| 1     | 18.328    | 1.798 | 545735   |
| 2     | 23.304    | 98.2  | 29806518 |
| Total |           | 100   | 30352253 |

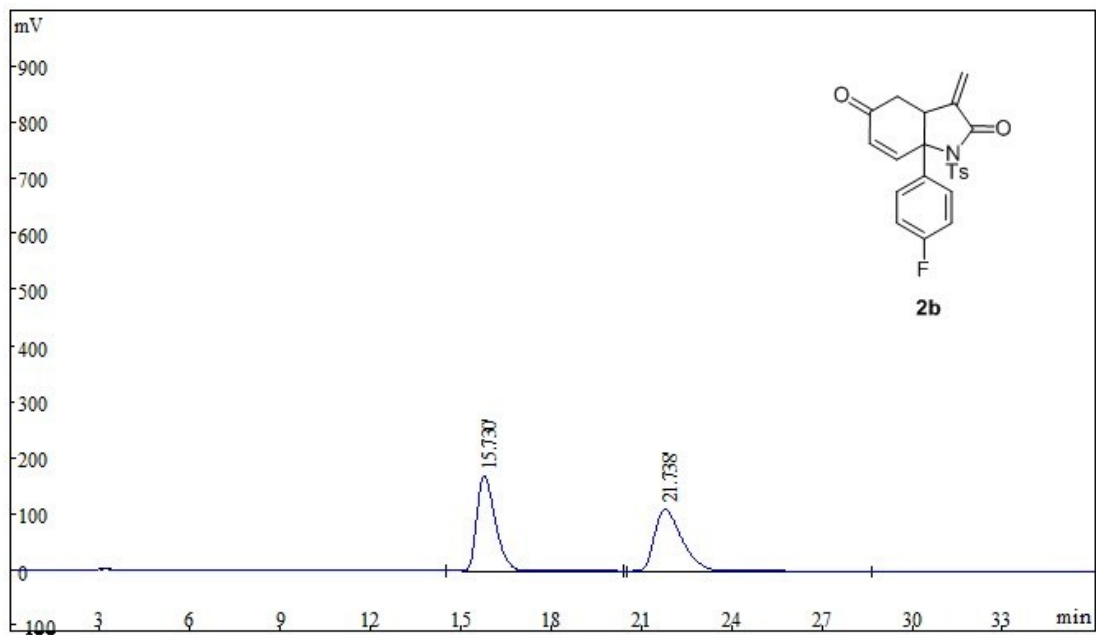

| Rank  | Time(min) | Area% | Area     |
|-------|-----------|-------|----------|
| 1     | 15.730    | 49.89 | 7593594  |
| 2     | 21.738    | 50.11 | 7626408  |
| Total |           | 100   | 15220002 |

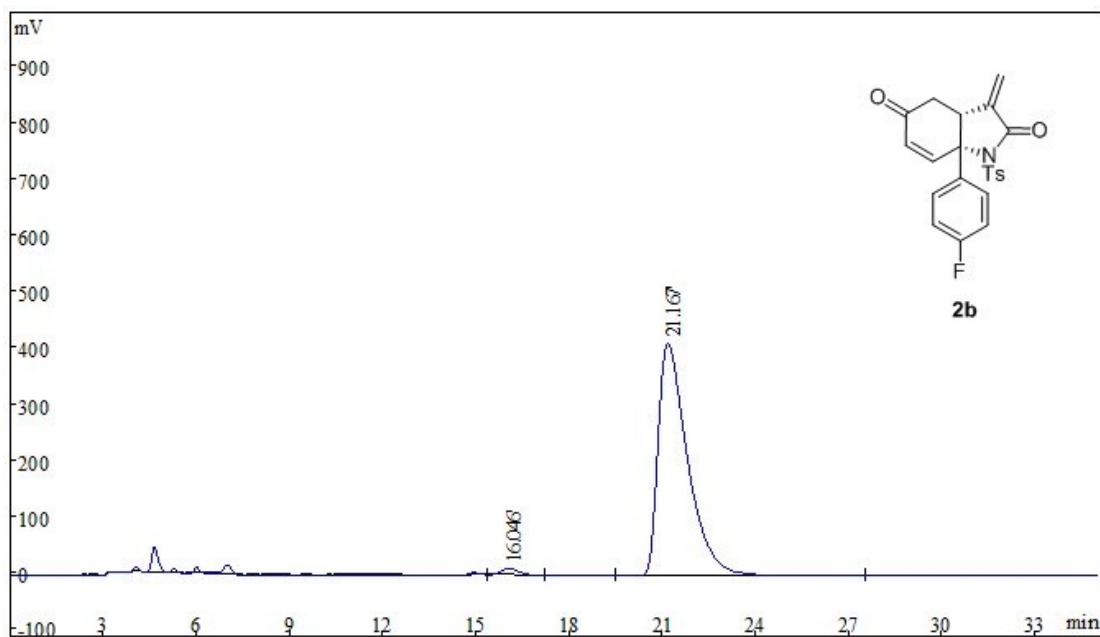

| Rank  | Time(min) | Area% | Area     |
|-------|-----------|-------|----------|
| 1     | 16.046    | 1.784 | 499433   |
| 2     | 21.167    | 98.21 | 27501216 |
| Total |           | 100   | 28000649 |

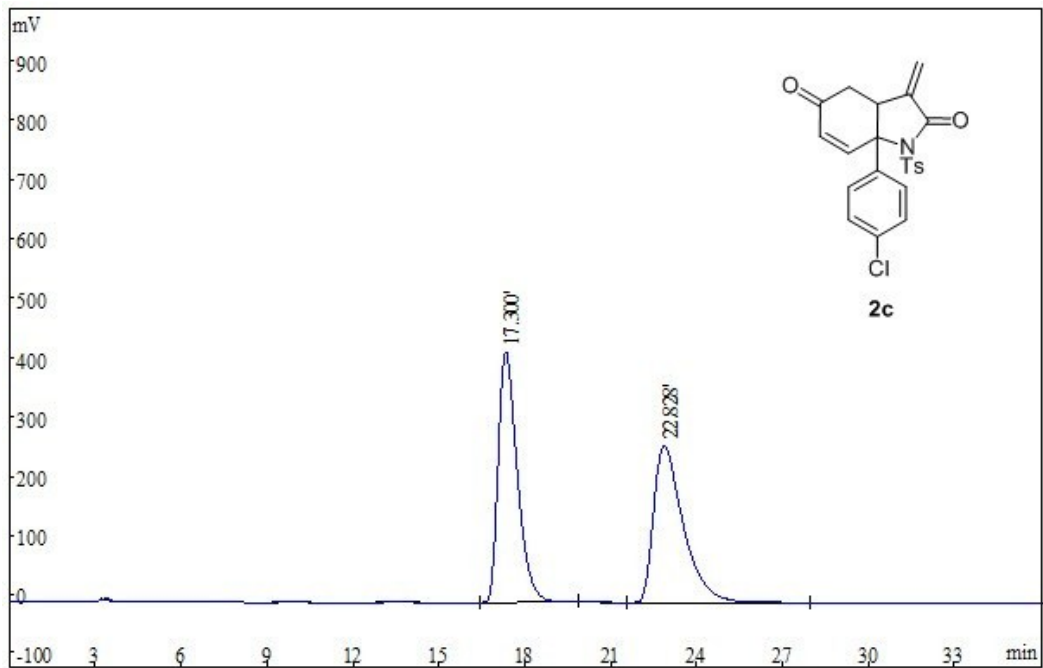

| Rank  | Time(min) | Area% | Area     |
|-------|-----------|-------|----------|
| 1     | 17.300    | 50.17 | 19864966 |
| 2     | 22.828    | 49.83 |          |
| Total |           | 100   | 39591873 |

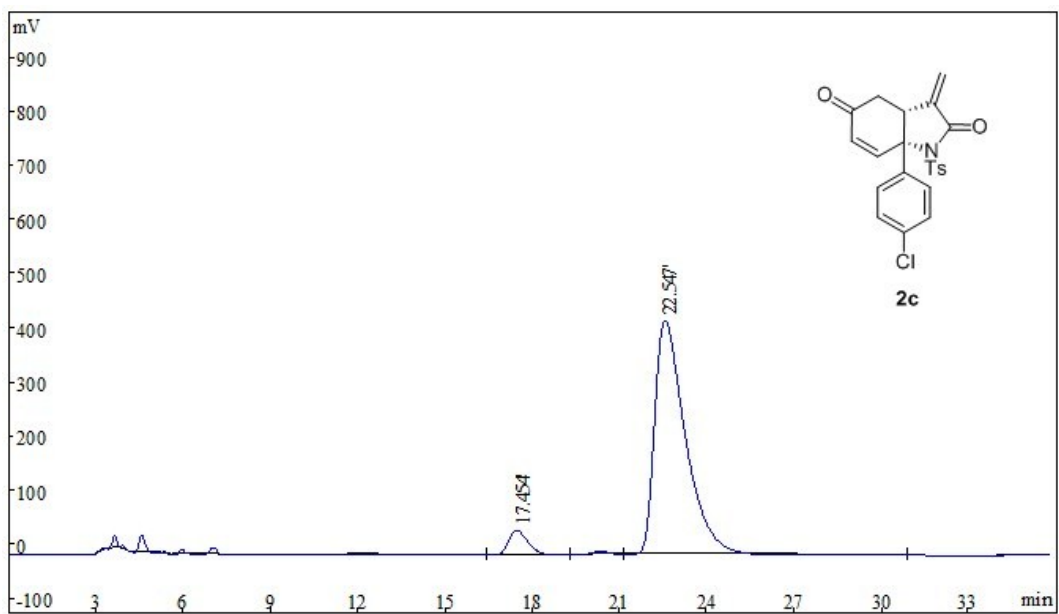

| Rank  | Time(min) | Area% | Area     |
|-------|-----------|-------|----------|
| 1     | 17.454    | 6.389 | 2195258  |
| 2     | 22.547    | 93.61 | 32165456 |
| Total |           | 100   | 39591873 |

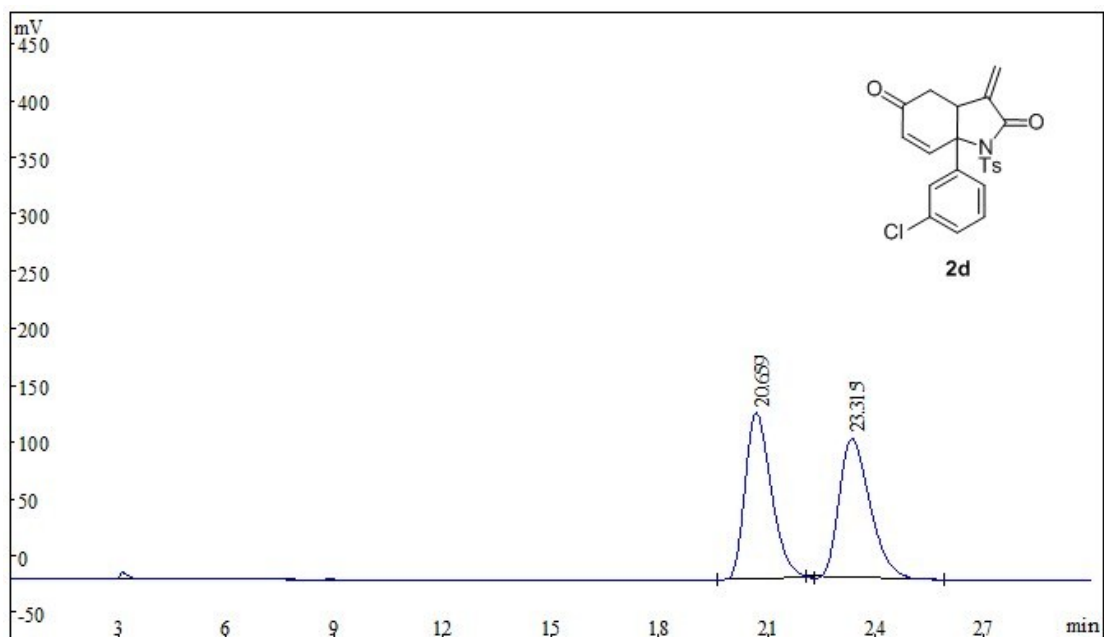

| Rank  | Time(min) | Area% | Area     |
|-------|-----------|-------|----------|
| 1     | 20.659    | 50.51 | 7510626  |
| 2     | 23.315    | 49.49 | 7359526  |
| Total |           | 100   | 14870152 |

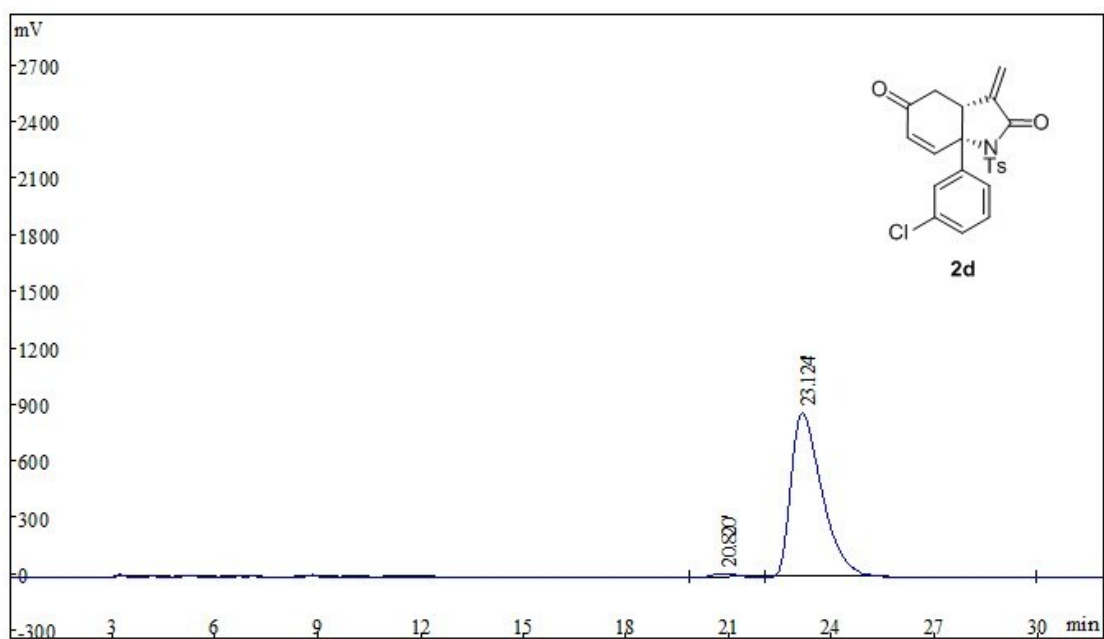

| Rank  | Time(min) | Area% | Area     |
|-------|-----------|-------|----------|
| 1     | 20.820    | 2.029 | 1160566  |
| 2     | 23.124    | 97.97 | 56039821 |
| Total |           | 100   | 57200387 |

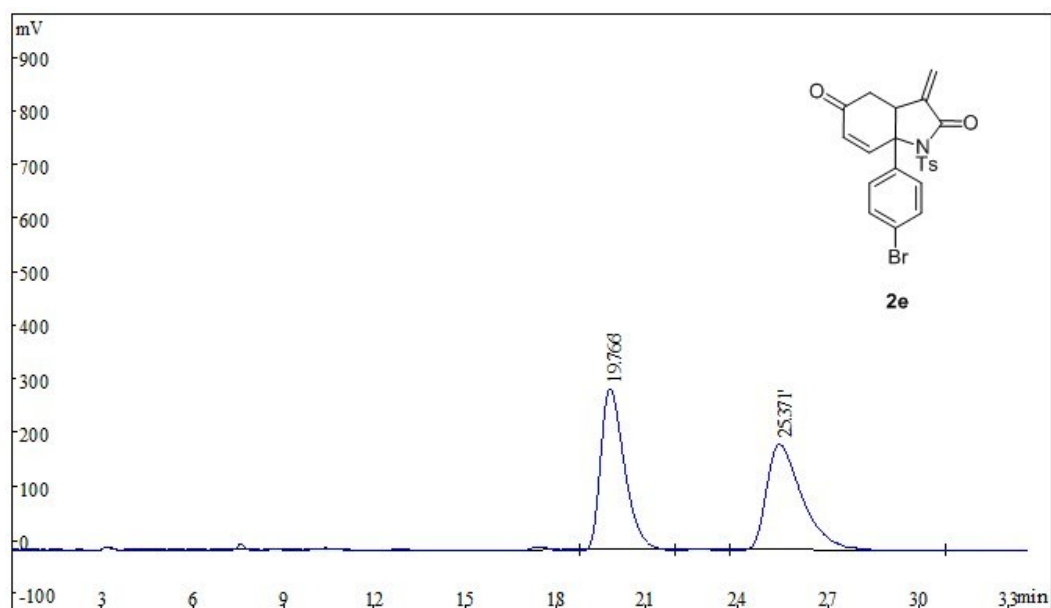

| Rank  | Time(min) | Area% | Area     |
|-------|-----------|-------|----------|
| 1     | 19.766    | 49.8  | 16601266 |
| 2     | 25.371    | 50.2  | 16731392 |
| Total |           | 100   | 33332658 |

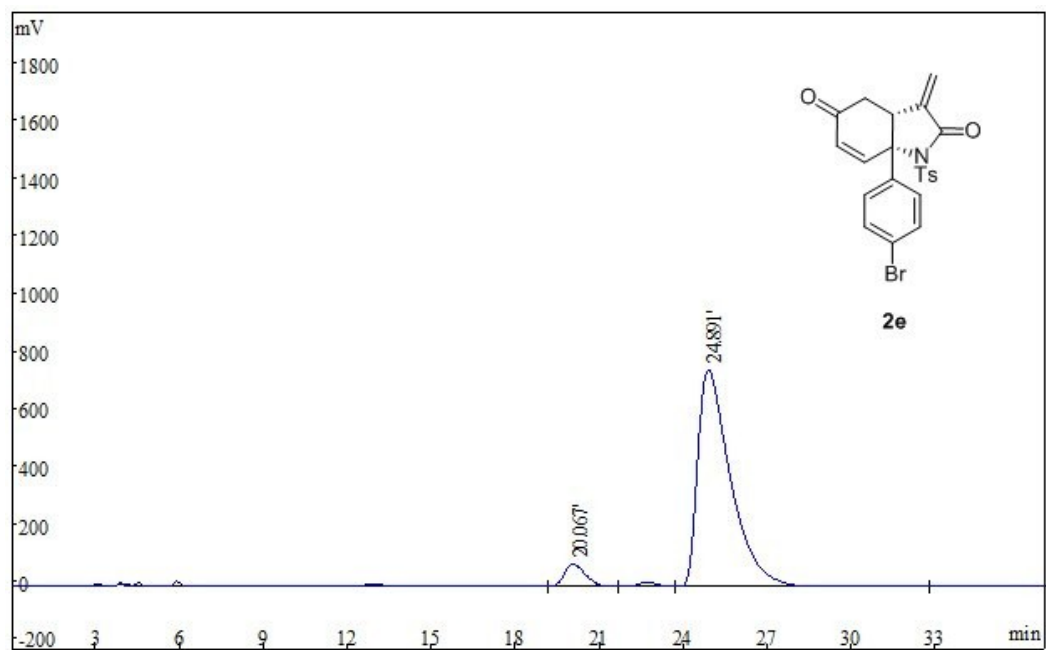

| Rank  | Time(min) | Area% | Area     |
|-------|-----------|-------|----------|
| 1     | 20.067    | 6.222 | 4094131  |
| 2     | 24.891    | 93.78 | 61705798 |
| Total |           | 100   | 65799929 |

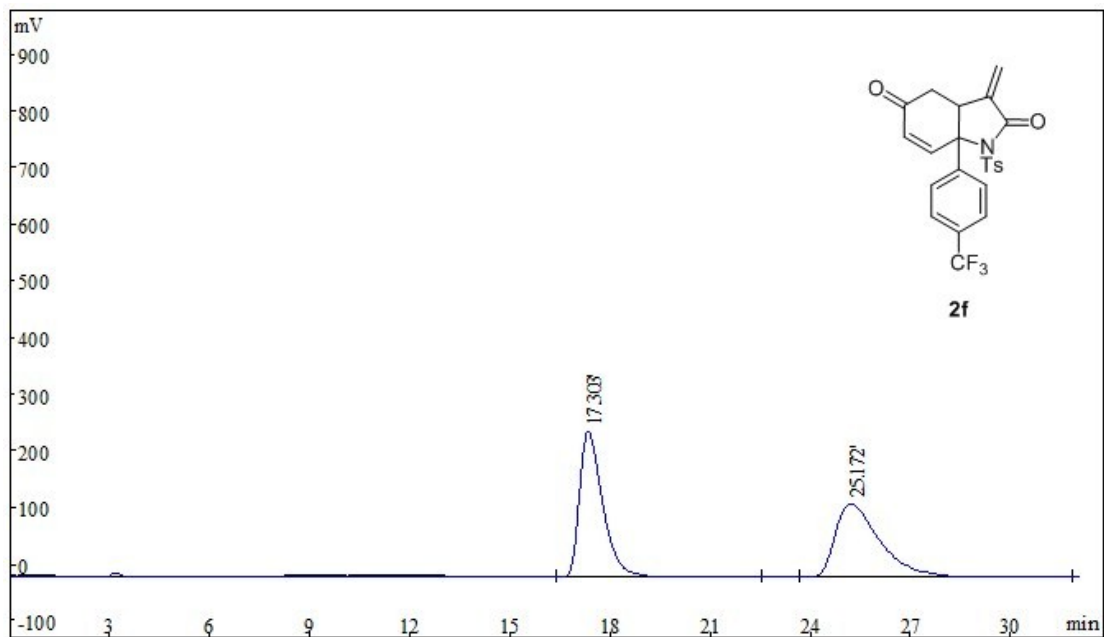

| Rank  | Time(min) | Area% | Area     |
|-------|-----------|-------|----------|
| 1     | 17.303    | 50.39 | 12583542 |
| 2     | 25.172    | 49.61 | 12387802 |
| Total |           | 100   | 24971344 |

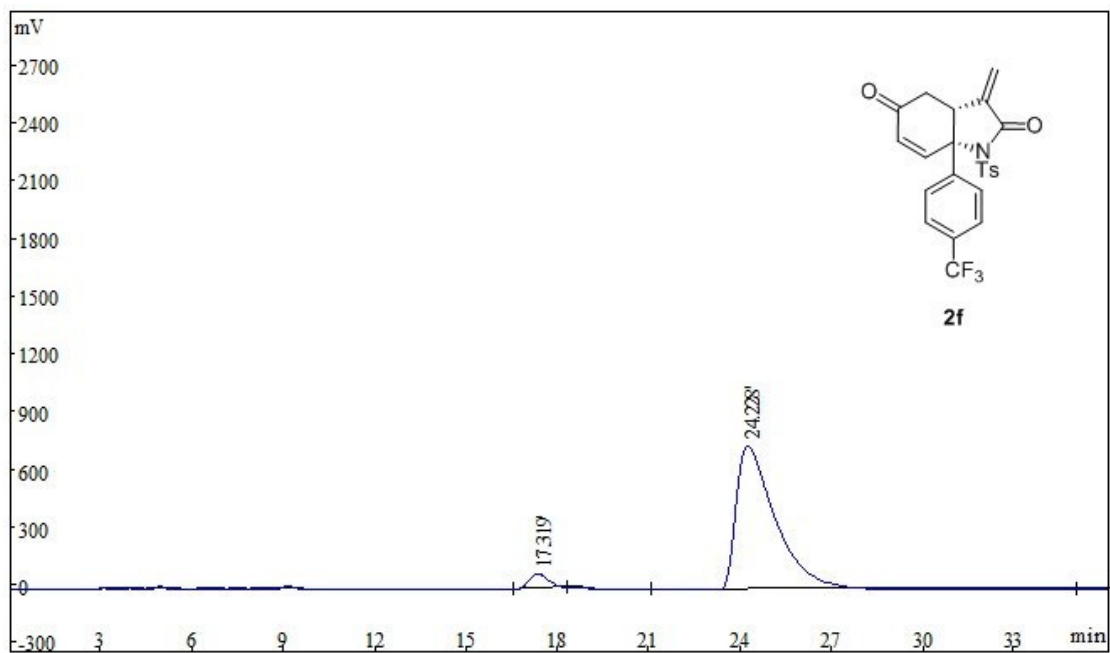

| Rank  | Time(min) | Area% | Area     |
|-------|-----------|-------|----------|
| 1     | 17.319    | 4.869 | 3446609  |
| 2     | 24.228    | 95.13 | 67343808 |
| Total |           | 100   | 70790417 |

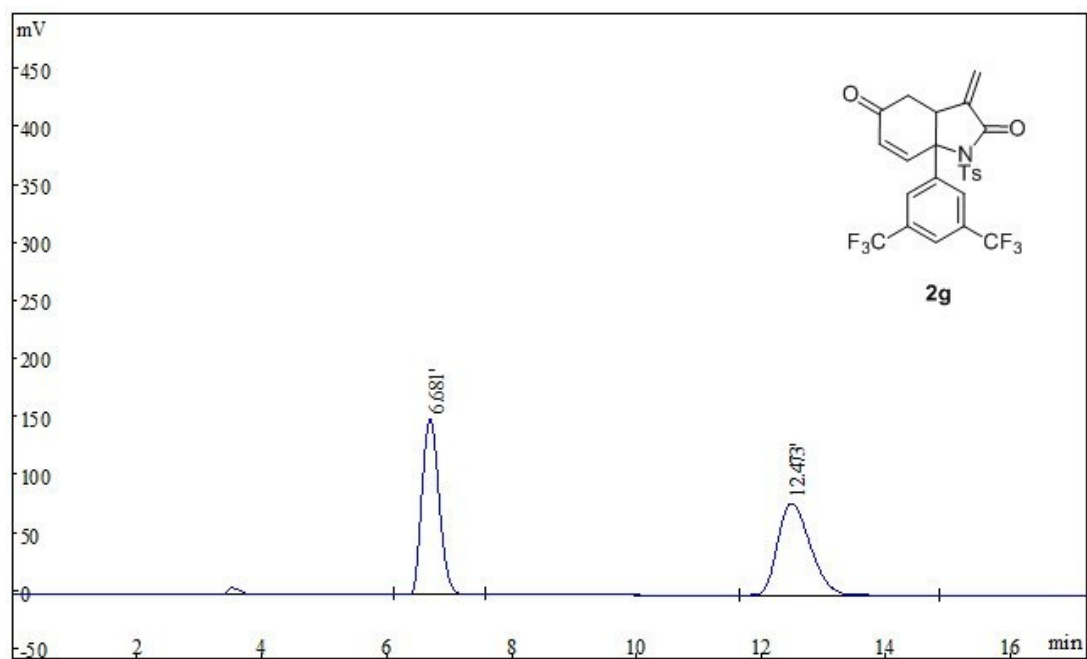

| Rank  | Time(min) | Area% | Area    |
|-------|-----------|-------|---------|
| 1     | 6.681     | 49.65 | 2916083 |
| 2     | 12.473    | 50.35 | 2956894 |
| Total |           | 100   | 5872977 |

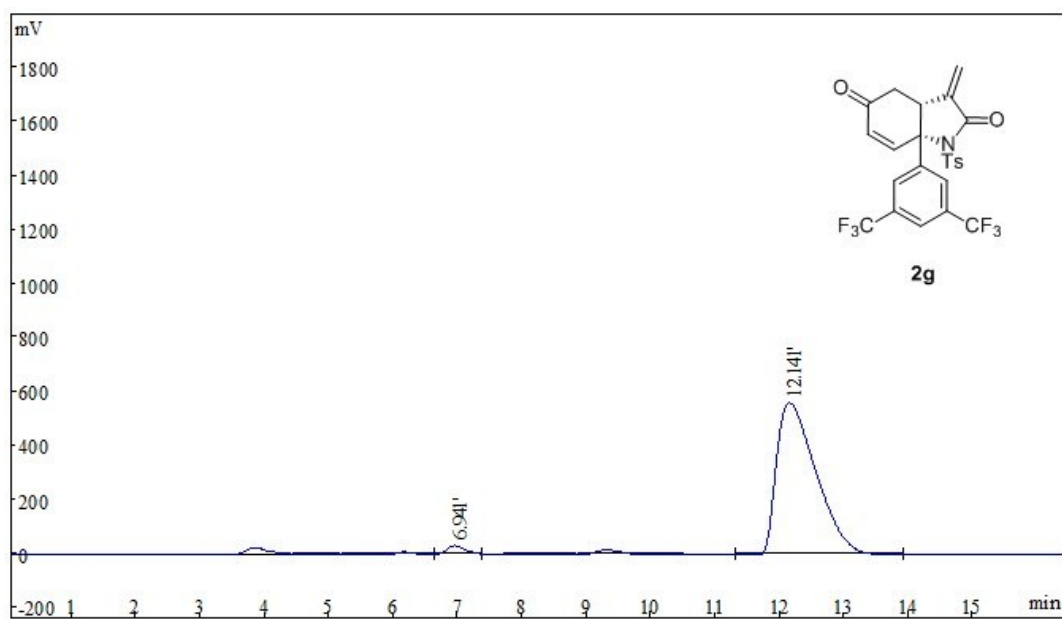

| Rank  | Time(min) | Area% | Area     |
|-------|-----------|-------|----------|
| 1     | 6.941     | 2.596 | 642306   |
| 2     | 12.141    | 97.41 | 24096230 |
| Total |           | 100   | 24738536 |

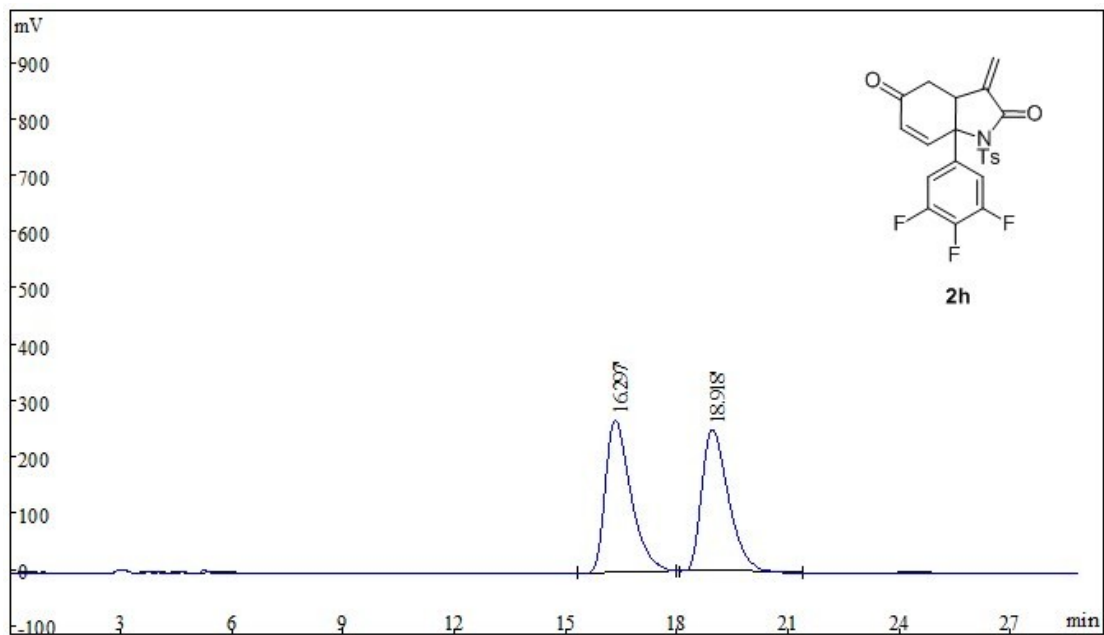

| Rank  | Time(min) | Area% | Area     |
|-------|-----------|-------|----------|
| 1     | 16.297    | 50.63 | 13086445 |
| 2     | 18.918    | 49.37 | 12759405 |
| Total |           | 100   | 25845850 |

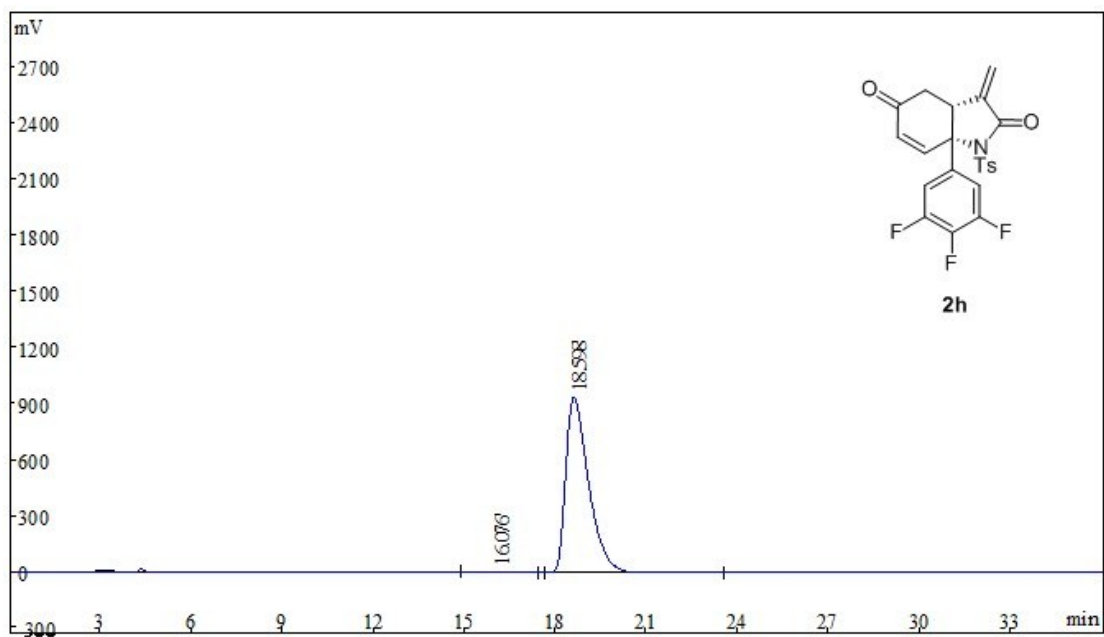

| Rank  | Time(min) | Area% | Area     |
|-------|-----------|-------|----------|
| 1     | 16.076    | 1.736 | 876061   |
| 2     | 18.598    | 98.27 | 49579590 |
| Total |           | 100   | 50455651 |



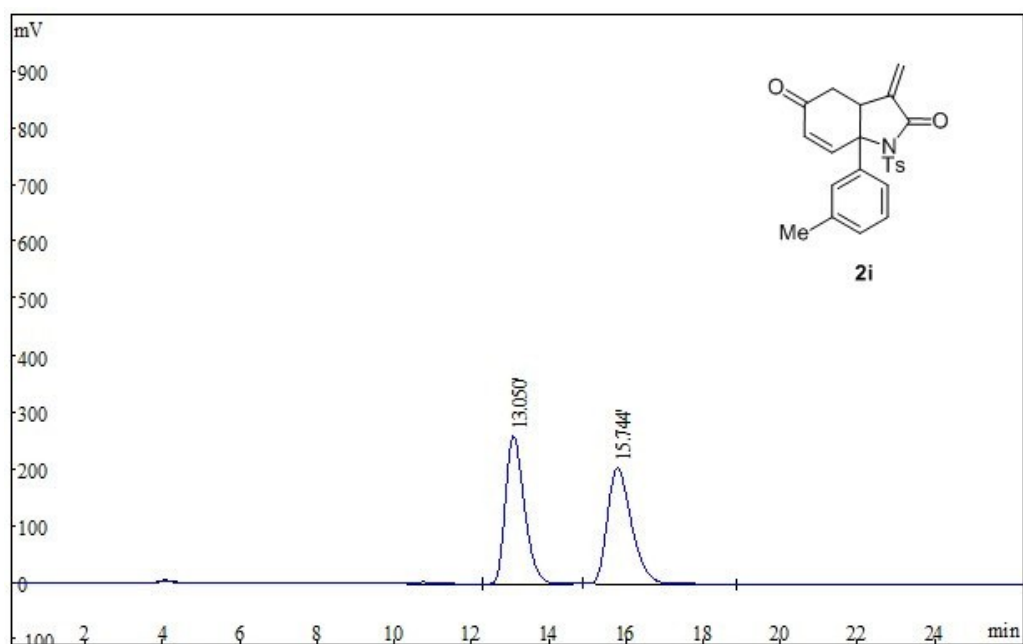

| Rank  | Time(min) | Area% | Area     |
|-------|-----------|-------|----------|
| 1     | 13.050    | 49.85 | 9162012  |
| 2     | 15.744    | 50.15 | 9217637  |
| Total |           | 100   | 18379649 |

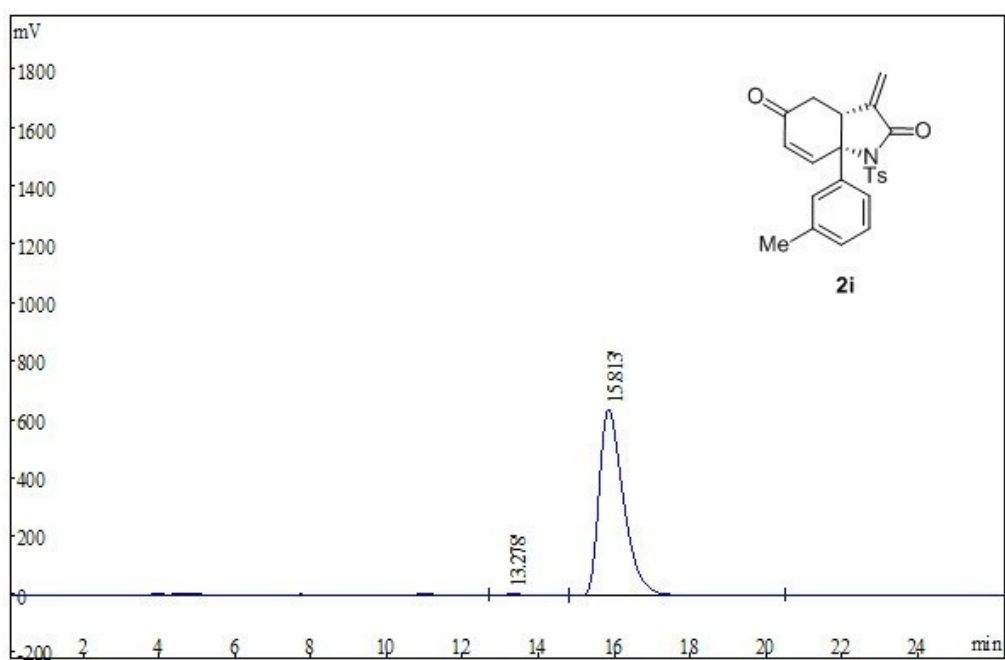

| Rank  | Time(min) | Area%  | Area     |
|-------|-----------|--------|----------|
| 1     | 13.278    | 0.9748 | 286690   |
| 2     | 15.813    | 99.02  | 29121478 |
| Total |           | 100    | 18379649 |

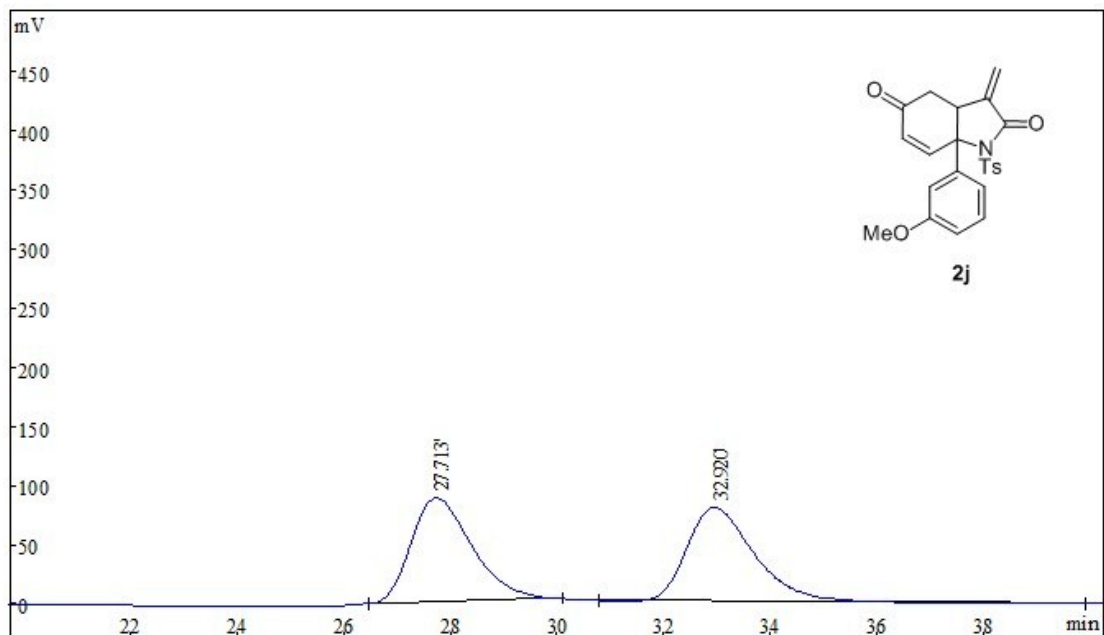

| Rank  | Time(min) | Area% | Area     |
|-------|-----------|-------|----------|
| 1     | 27.713    | 50.26 | 7091435  |
| 2     | 32.920    | 49.74 | 7017488  |
| Total |           | 100   | 14108923 |

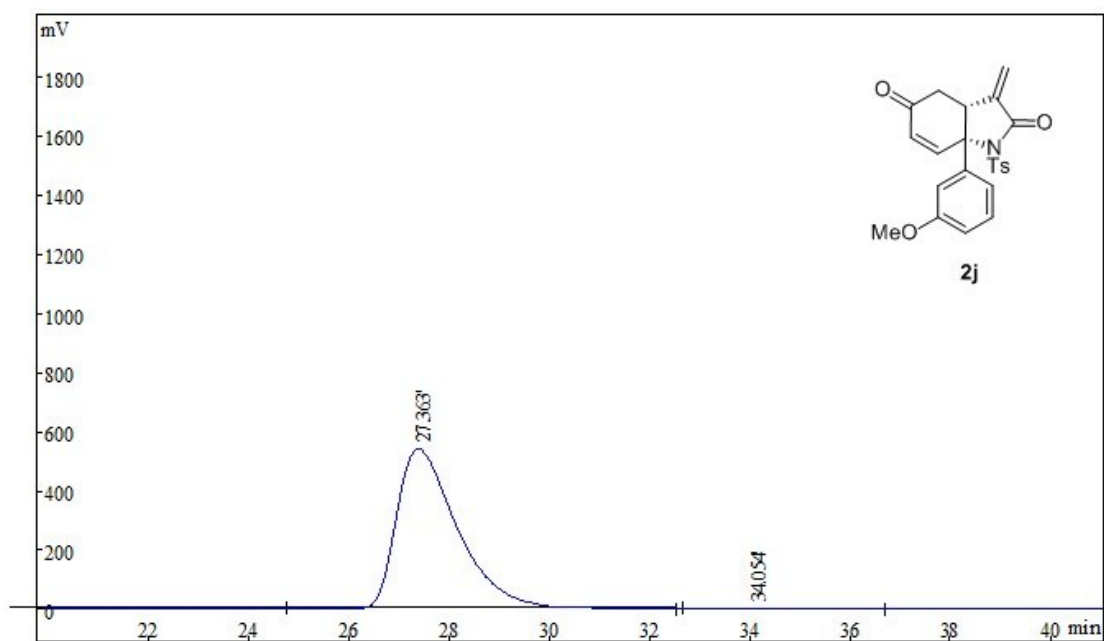

| Rank  | Time(min) | Area%  | Area     |
|-------|-----------|--------|----------|
| 1     | 27.363    | 99.4   | 46269683 |
| 2     | 34.054    | 0.6062 | 282180   |
| Total |           | 100    | 46551863 |

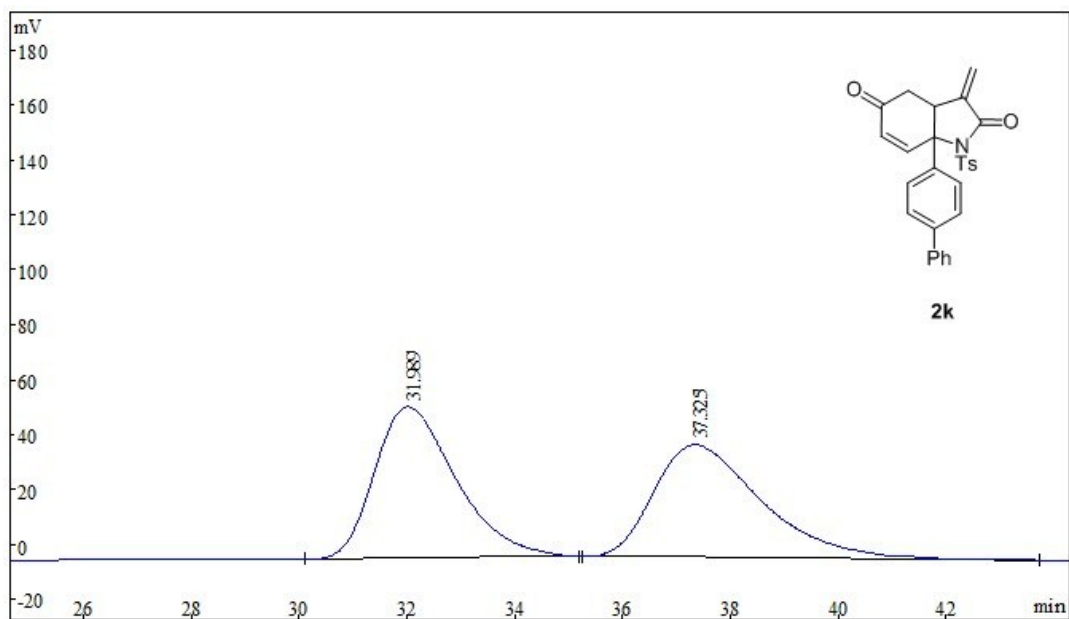

| Rank  | Time(min) | Area% | Area     |
|-------|-----------|-------|----------|
| 1     | 31.989    | 50.33 | 5801236  |
| 2     | 37.325    | 49.67 | 5724531  |
| Total |           | 100   | 11525767 |

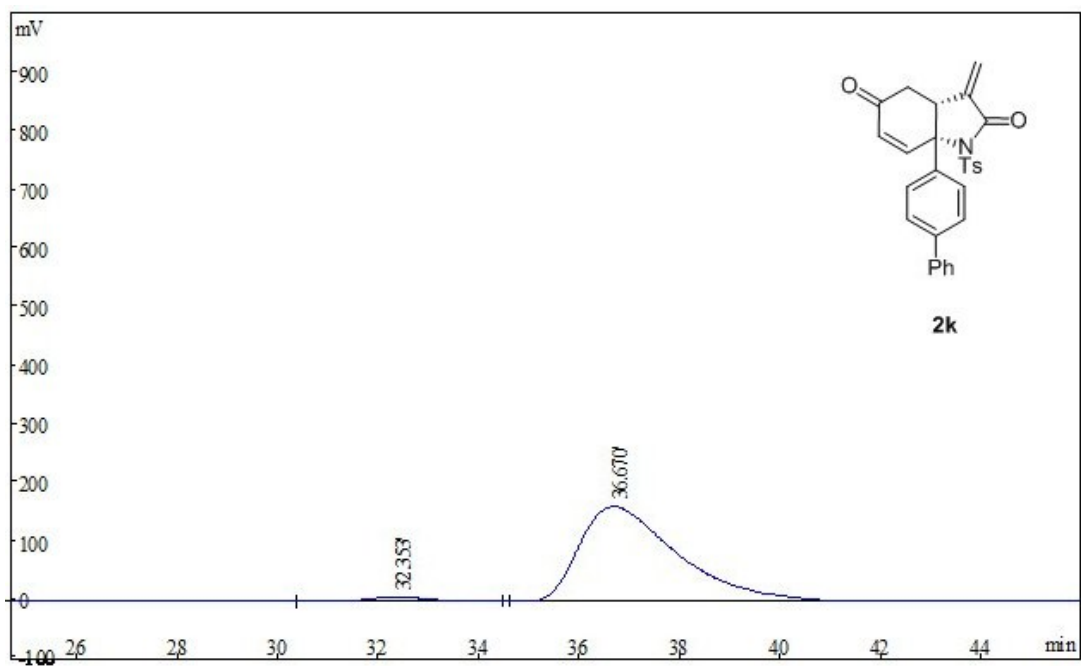

| Rank  | Time(min) | Area% | Area     |
|-------|-----------|-------|----------|
| 1     | 32.353    | 3.897 | 917832   |
| 2     | 36.670    | 96.11 | 22633830 |
| Total |           | 100   | 23551662 |

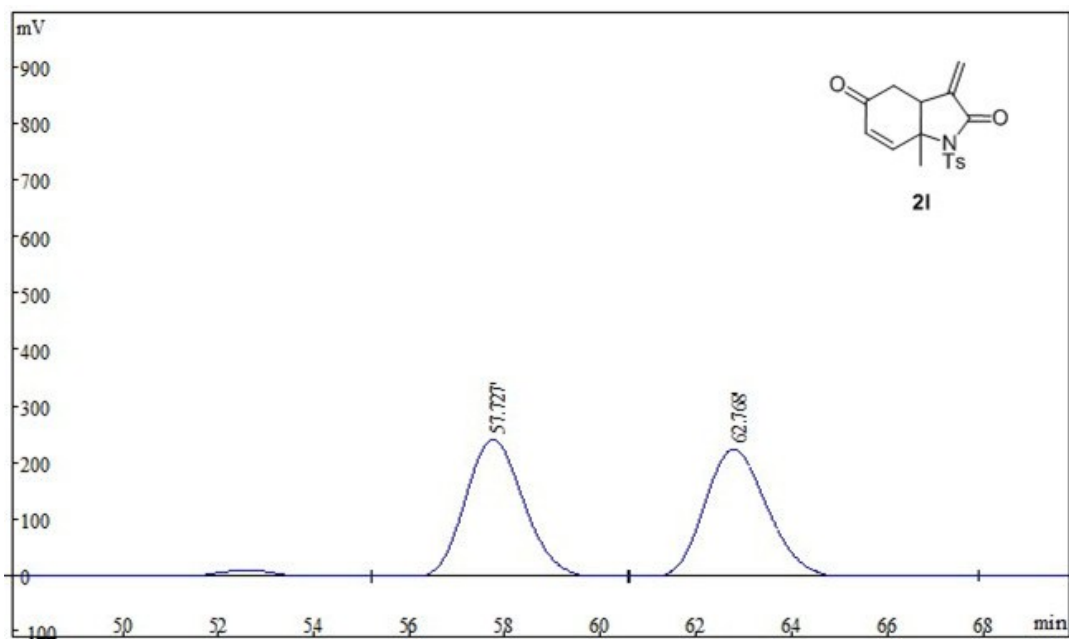

| Rank  | Time(min) | Area% | Area     |
|-------|-----------|-------|----------|
| 1     | 57.727    | 49.99 | 20860410 |
| 2     | 62.768    | 50.01 | 20870883 |
| Total |           | 100   | 23551662 |

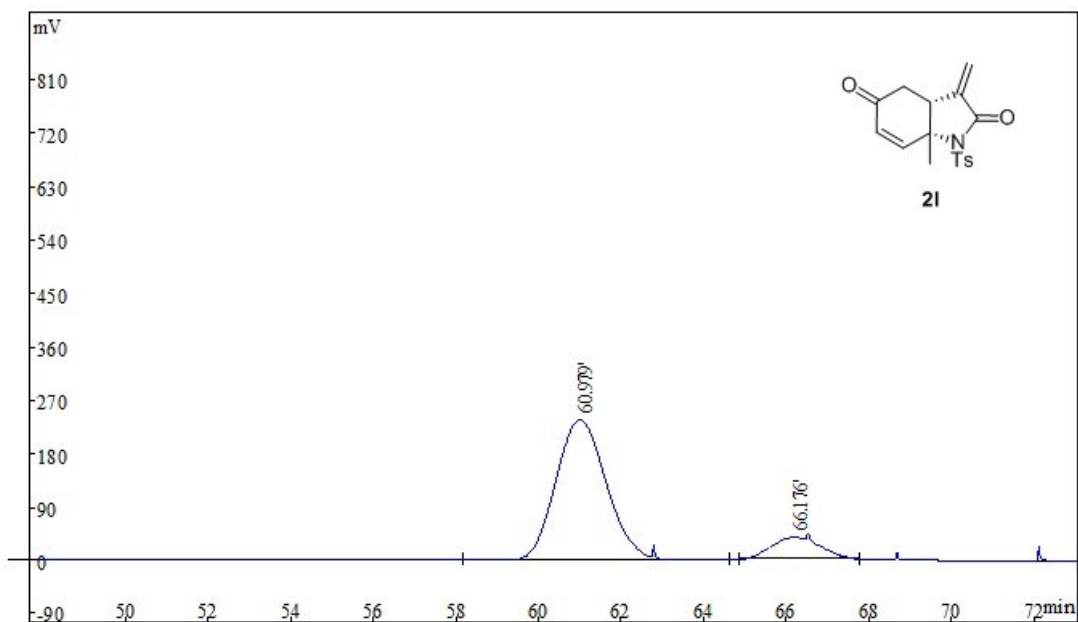

| Rank  | Time(min) | Area% | Area     |
|-------|-----------|-------|----------|
| 1     | 60.979    | 86.05 | 20476722 |
| 2     | 66.176    | 13.95 | 3318349  |
| Total |           | 100   | 23795071 |

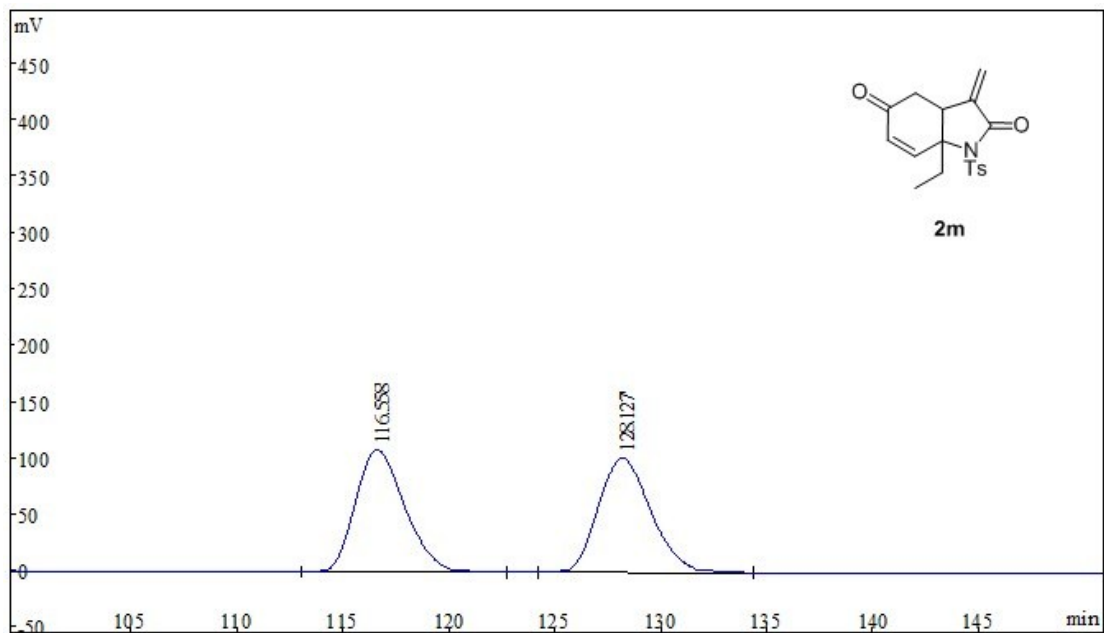

| Rank  | Time(min) | Area% | Area     |
|-------|-----------|-------|----------|
| 1     | 116.558   | 50.23 | 18148317 |
| 2     | 128.127   | 49.77 | 17982581 |
| Total |           | 100   | 36130898 |

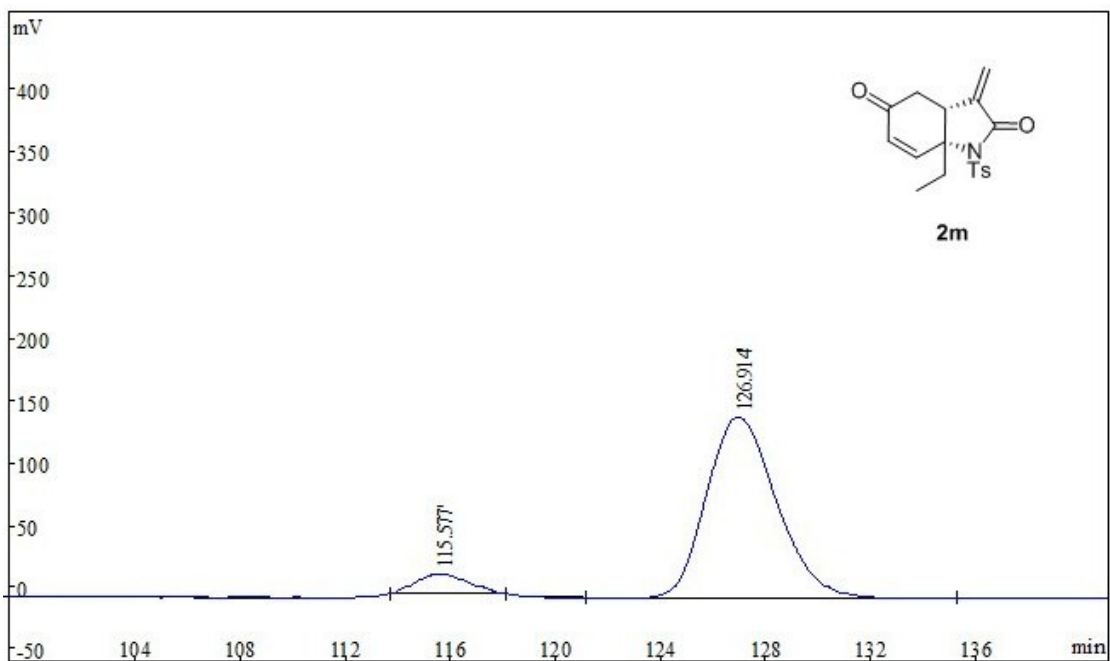

| Rank  | Time(min) | Area% | Area     |
|-------|-----------|-------|----------|
| 1     | 115.577   | 7.937 | 2344141  |
| 2     | 126.914   | 92.07 | 27193139 |
| Total |           | 100   | 29537280 |

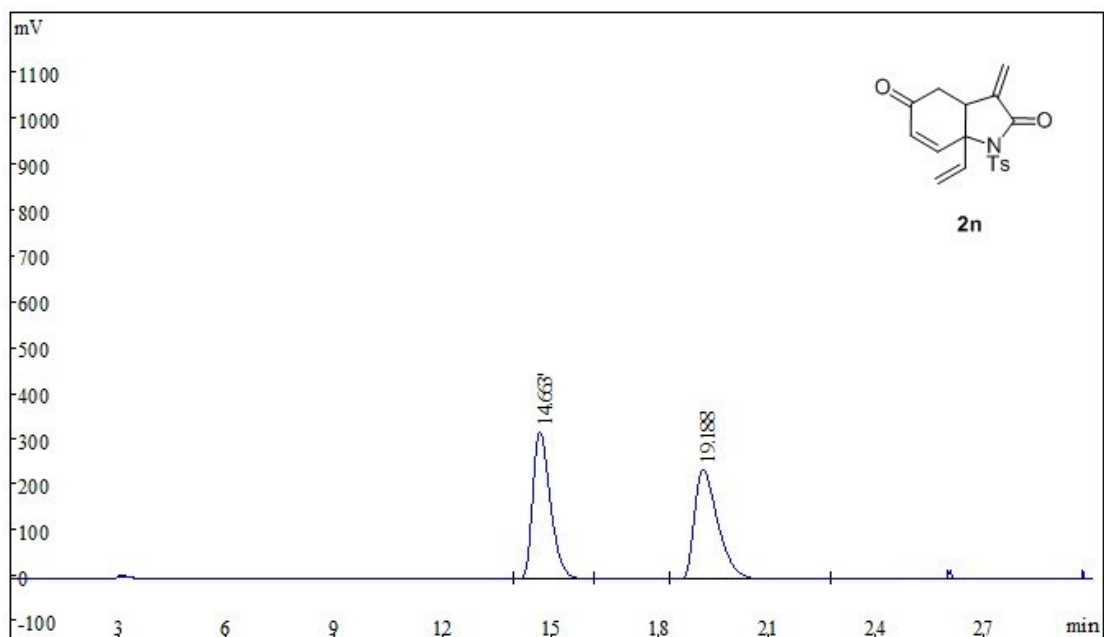

| Rank  | Time(min) | Area% | Area     |
|-------|-----------|-------|----------|
| 1     | 14.663    | 50.21 | 11036975 |
| 2     | 19.188    | 49.79 | 10943034 |
| Total |           | 100   | 21980009 |

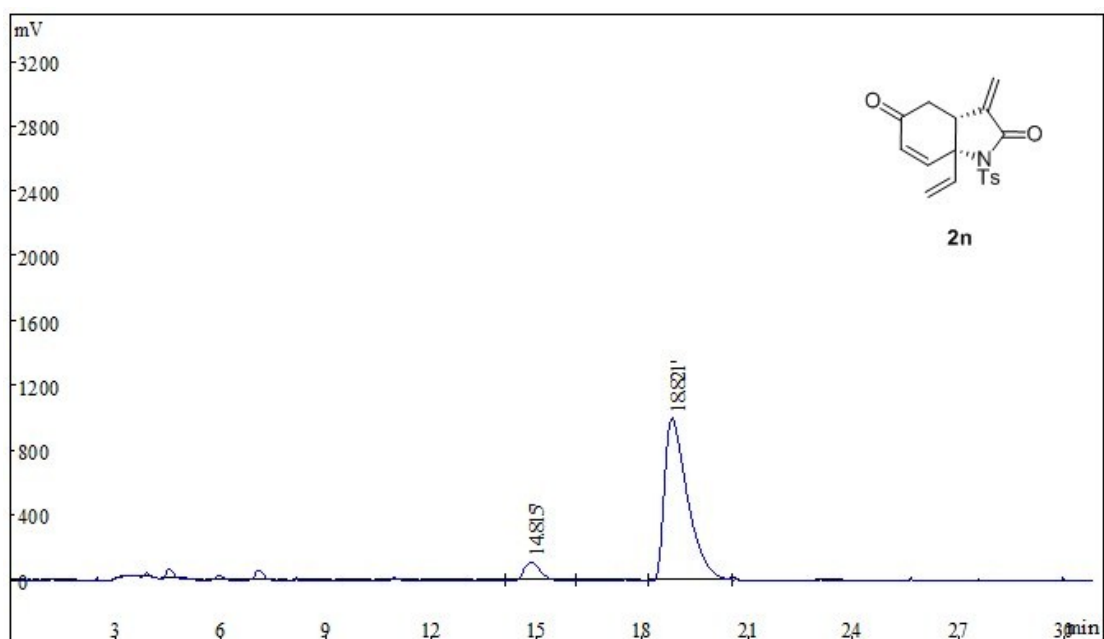

| Rank  | Time(min) | Area% | Area     |
|-------|-----------|-------|----------|
| 1     | 14.815    | 7.539 | 3721539  |
| 2     | 18.821    | 92.46 | 45639898 |
| Total |           | 100   | 49361437 |

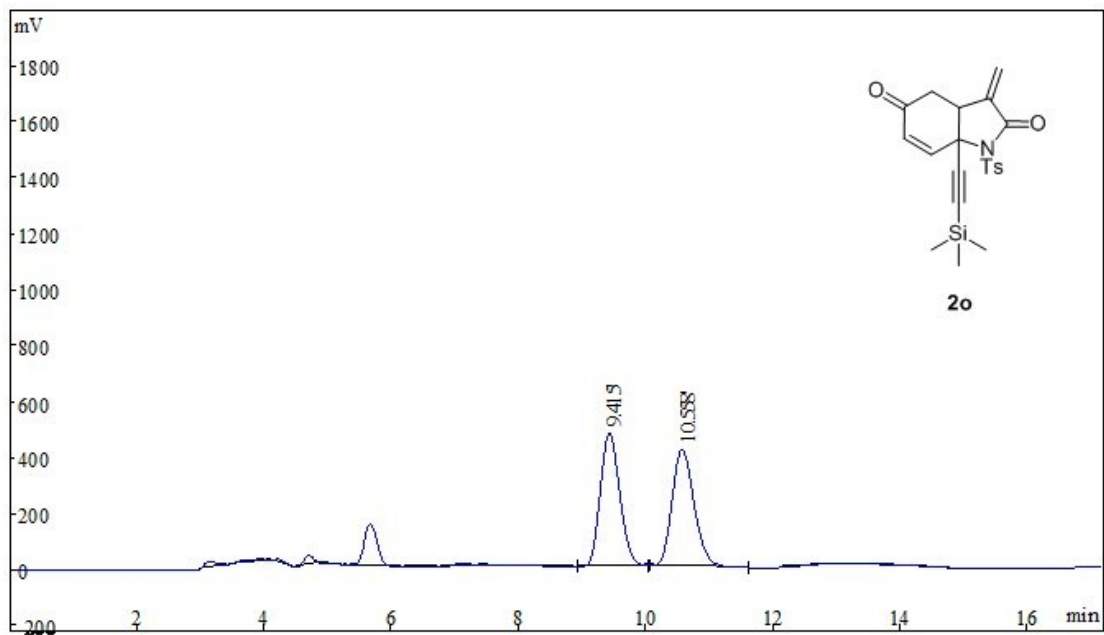

| Rank  | Time(min) | Area% | Area     |
|-------|-----------|-------|----------|
| 1     | 9.415     | 50.14 | 10143171 |
| 2     | 10.558    | 49.86 | 10084792 |
| Total |           | 100   | 20227963 |

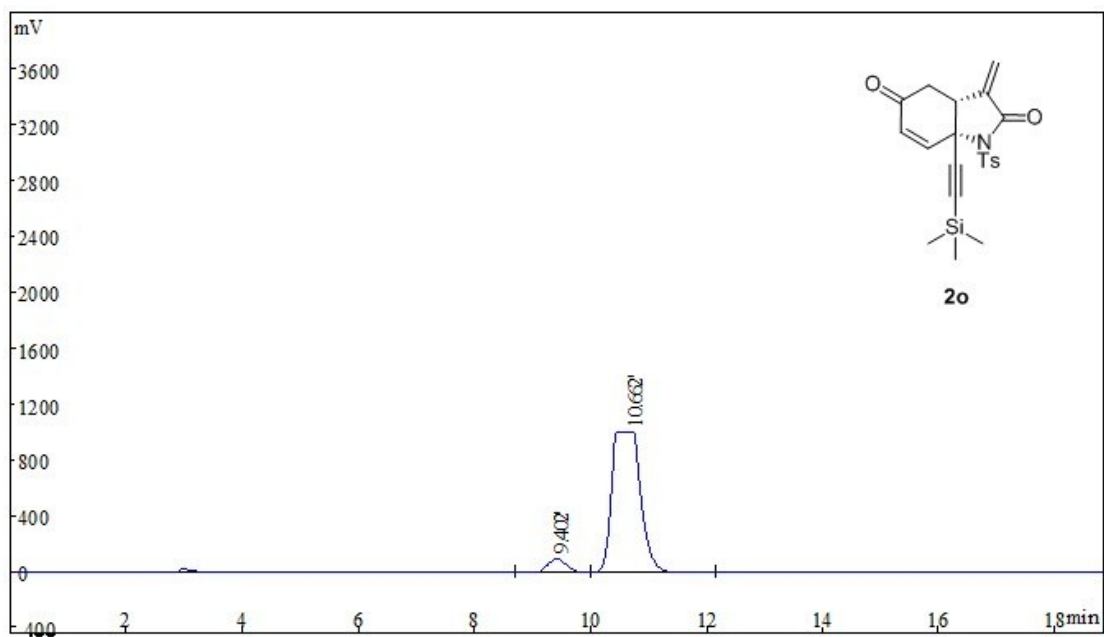

| Rank  | Time(min) | Area% | Area     |
|-------|-----------|-------|----------|
| 1     | 9.402     | 6.164 | 2276488  |
| 2     | 10.662    | 93.83 | 34655869 |
| Total |           | 100   | 36932357 |

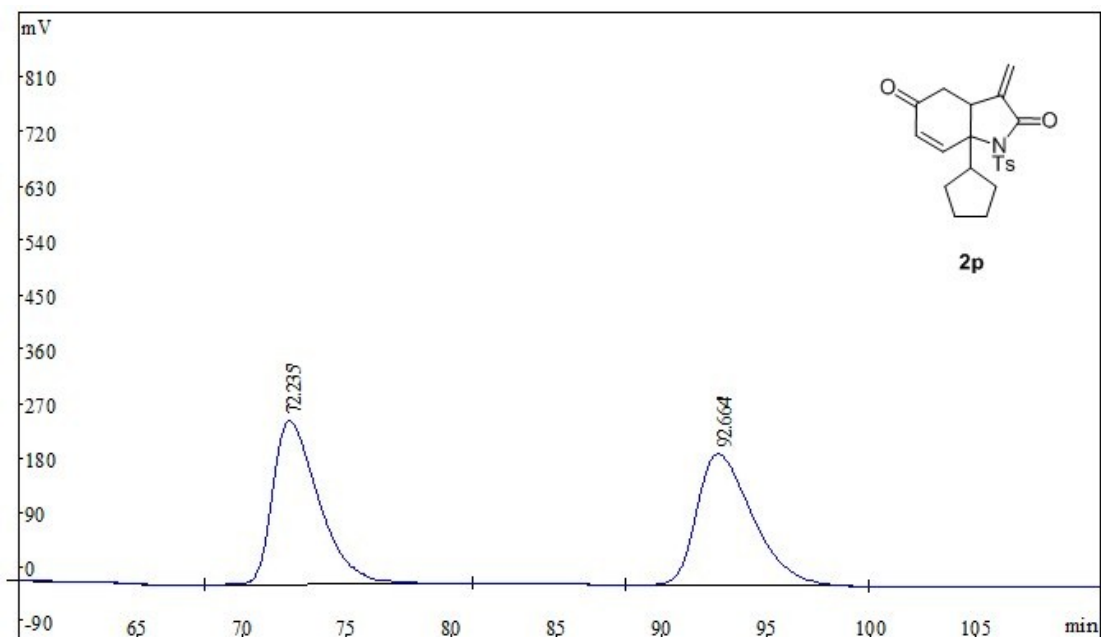

| Rank  | Time(min) | Area% | Area     |
|-------|-----------|-------|----------|
| 1     | 72.235    | 50.69 | 42143910 |
| 2     | 92.664    | 49.31 | 40992422 |
| Total |           | 100   | 83136332 |

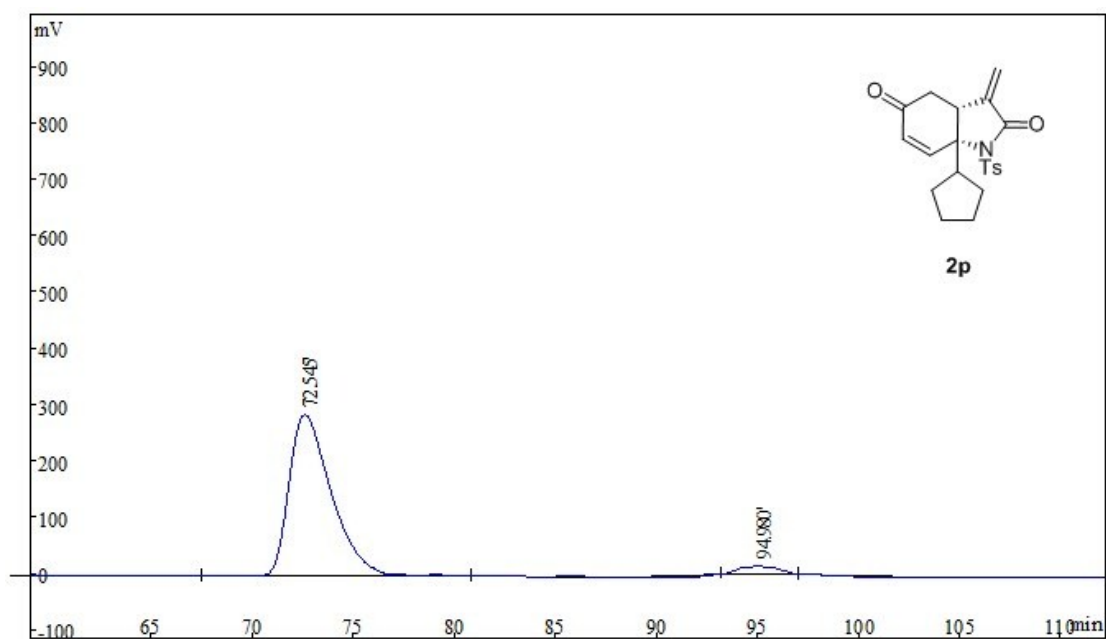

| Rank  | Time(min) | Area% | Area     |
|-------|-----------|-------|----------|
| 1     | 72.545    | 95.49 | 42371254 |
| 2     | 94.980    | 4.505 | 1998819  |
| Total |           | 100   | 44370073 |



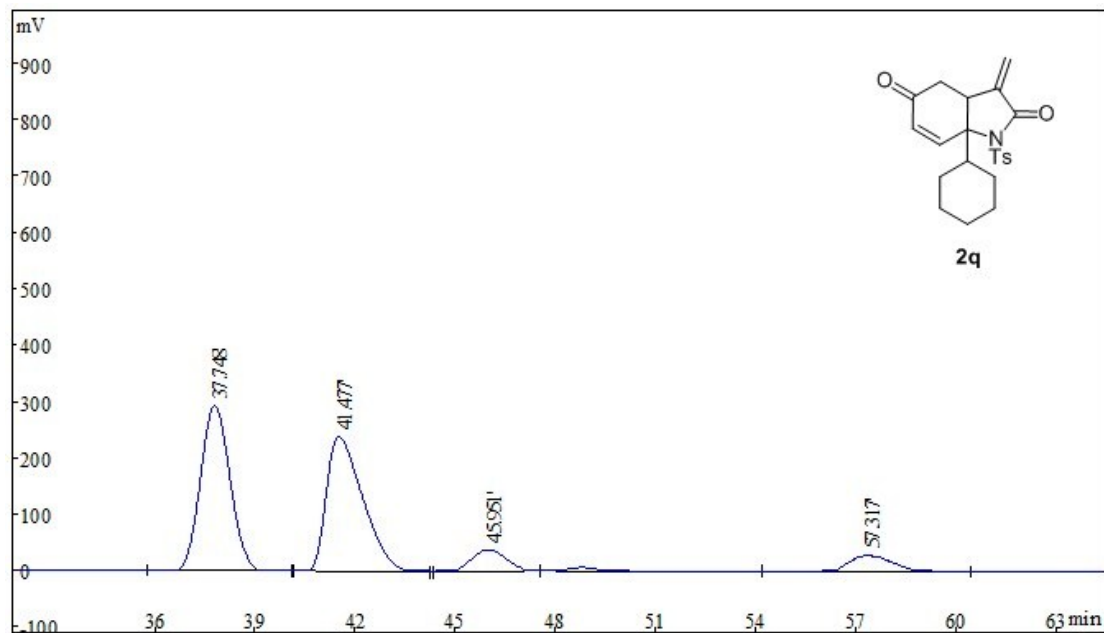

| Rank | Time(min) | Area% | Area     | Rank | Time(min) | Area% | Area    |
|------|-----------|-------|----------|------|-----------|-------|---------|
| 1    | 37.748    | 42.9  | 18499835 | 3    | 45.951    | 6.949 | 2996894 |
| 2    | 41.477    | 42.76 | 18439848 | 4    | 57.317    | 7.395 | 3189425 |

Total 100 43126002

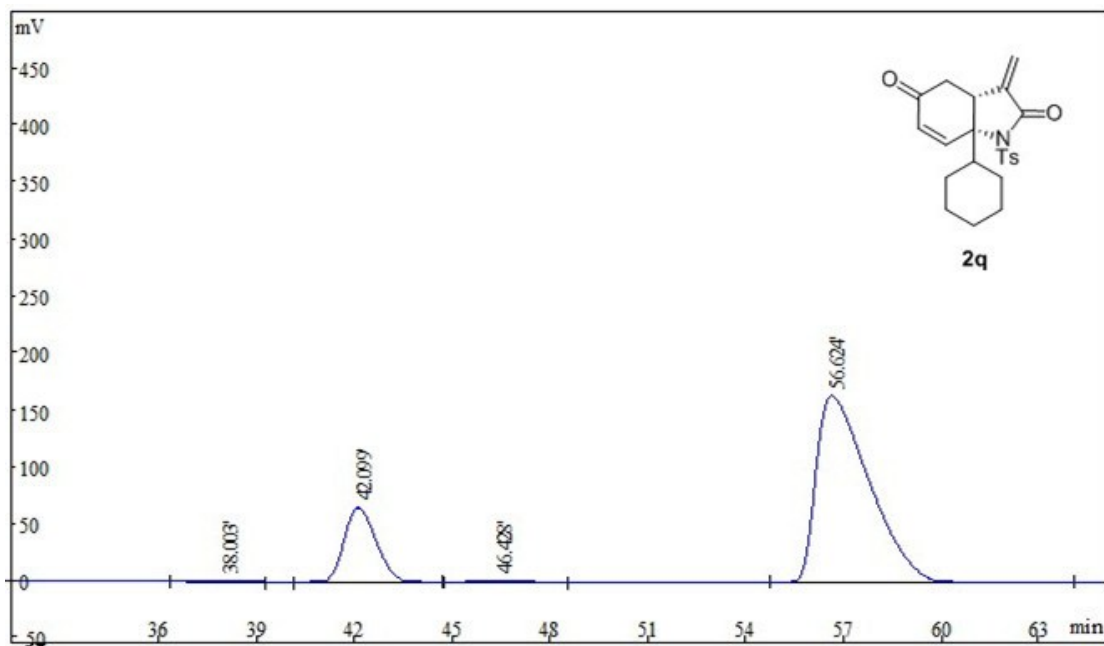

| Rank | Time(min) | Area%  | Area    | Rank | Time(min) | Area% | Area     |
|------|-----------|--------|---------|------|-----------|-------|----------|
| 1    | 38.003    | 0.5924 | 141884  | 3    | 46.428    | 1.048 | 250999   |
| 2    | 42.099    | 19.3   | 4622132 | 4    | 56.624    | 79.06 | 18936269 |

Total 100 23951284

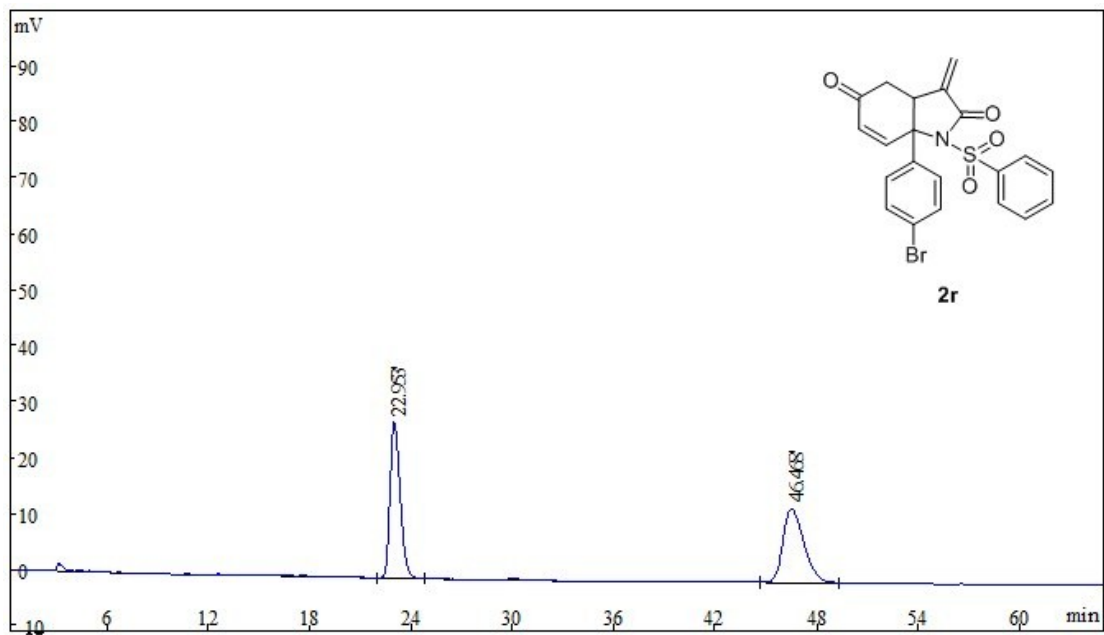

| Rank  | Time(min) | Area% | Area    |
|-------|-----------|-------|---------|
| 1     | 22.953    | 50.14 | 1179187 |
| 2     | 46.468    | 49.86 | 1172772 |
| Total |           | 100   | 2351959 |

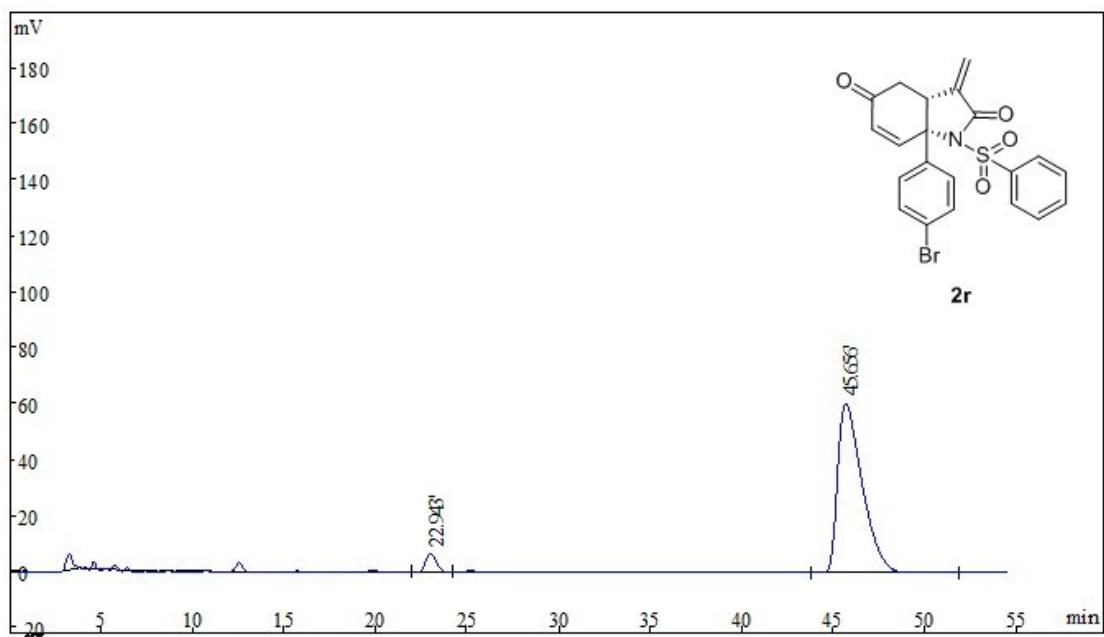

| Rank  | Time(min) | Area% | Area    |
|-------|-----------|-------|---------|
| 1     | 22.943    | 4.664 | 280582  |
| 2     | 45.656    | 95.33 | 5734586 |
| Total |           | 100   | 6015168 |

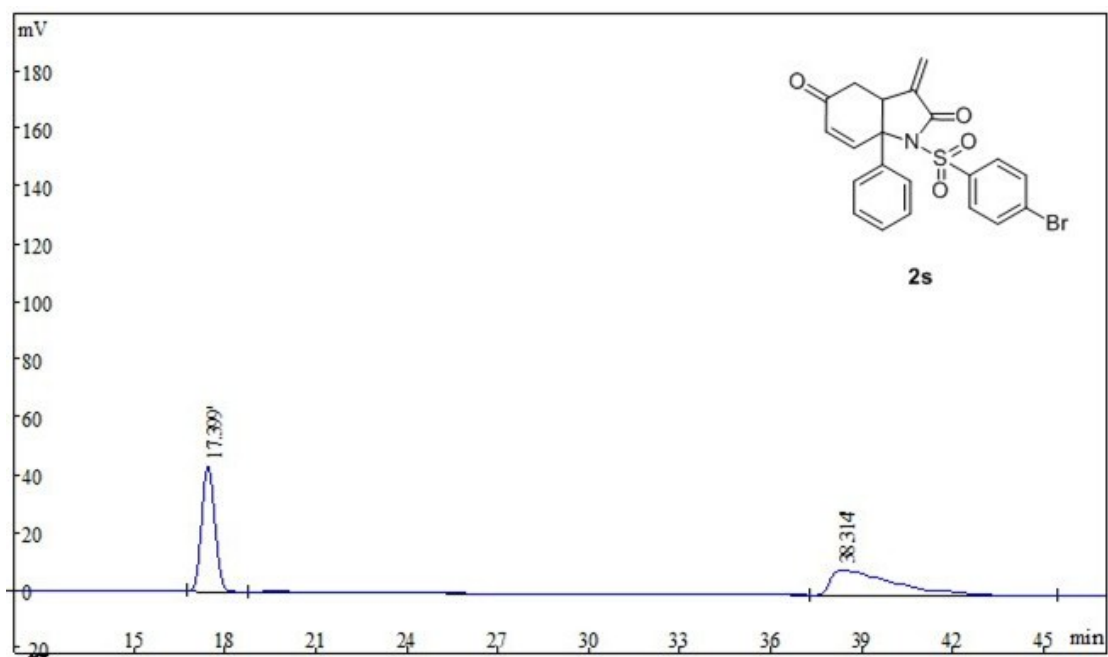

| Rank  | Time(min) | Area% | Area    |
|-------|-----------|-------|---------|
| 1     | 17.399    | 50.33 | 1352250 |
| 2     | 38.314    | 49.67 | 1334558 |
| Total |           | 100   | 2686808 |

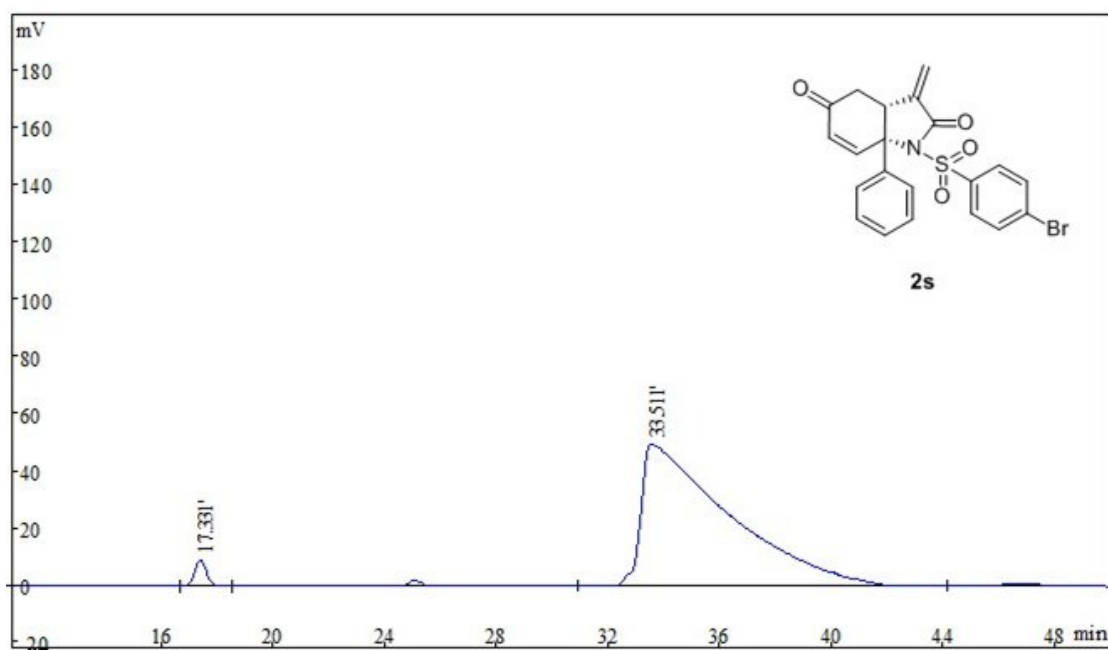

| Rank  | Time(min) | Area% | Area     |
|-------|-----------|-------|----------|
| 1     | 17.331    | 2.499 | 286567   |
| 2     | 33.511    | 97.5  | 11182633 |
| Total |           | 100   | 11469200 |

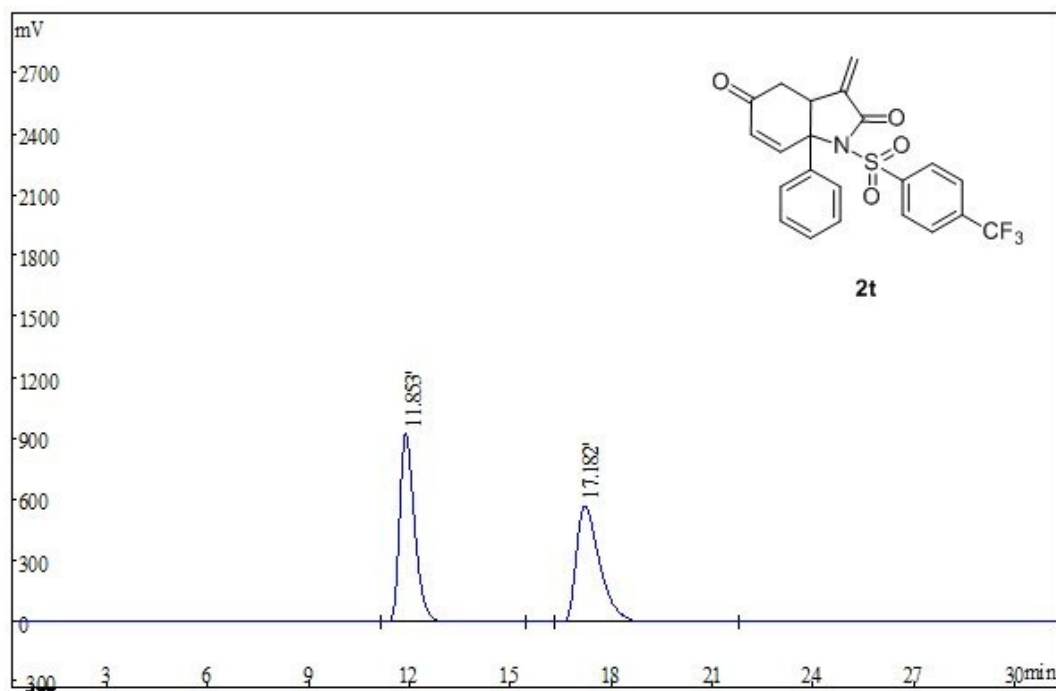

| Rank  | Time(min) | Area% | Area     |
|-------|-----------|-------|----------|
| 1     | 11.853    | 50.62 | 28893187 |
| 2     | 17.182    | 49.38 | 28185555 |
| Total |           | 100   | 57078742 |

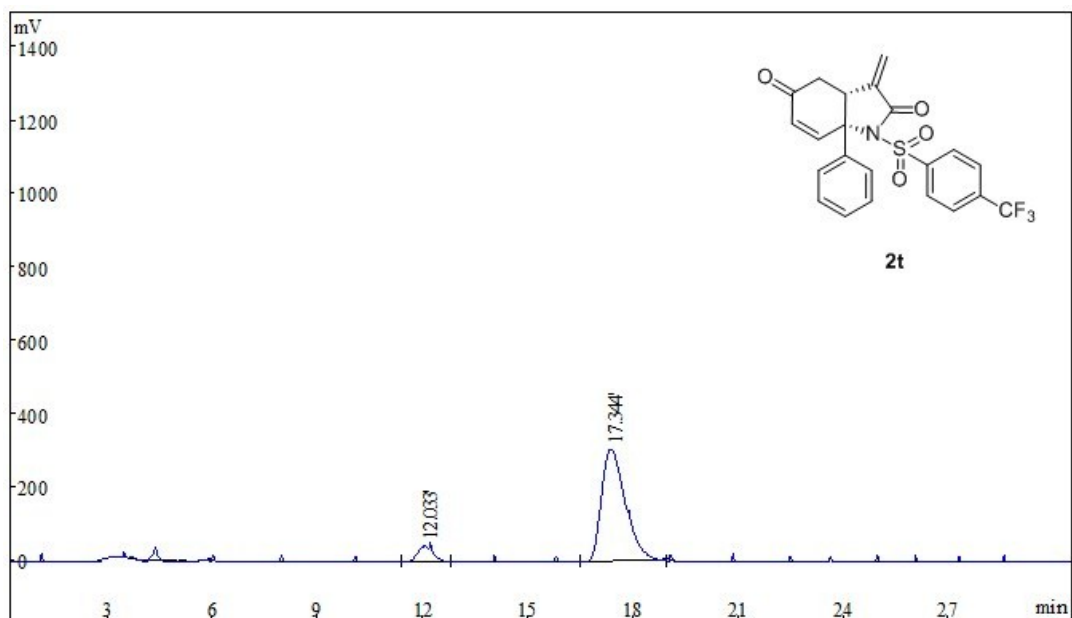

| Rank  | Time(min) | Area% | Area     |
|-------|-----------|-------|----------|
| 1     | 12.033    | 6.802 | 1074220  |
| 2     | 17.344    | 93.2  | 14718549 |
| Total |           | 100   | 15792769 |

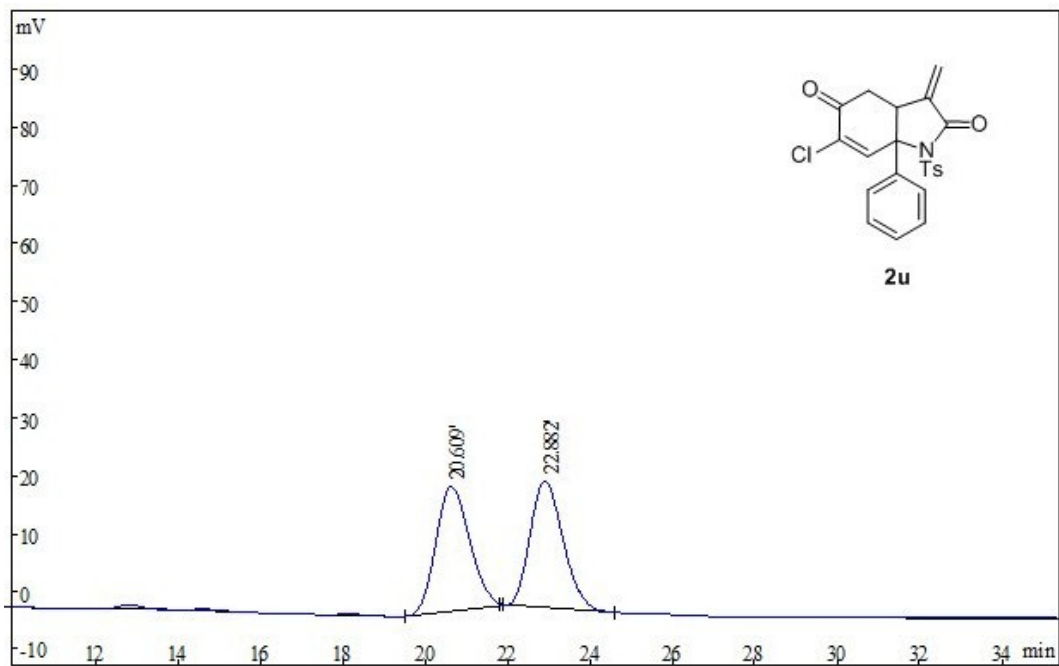

| Rank  | Time(min) | Area% | Area    |
|-------|-----------|-------|---------|
| 1     | 20.609    | 50.27 | 1249969 |
| 2     | 22.882    | 49.73 | 1236612 |
| Total |           | 100   | 2486581 |

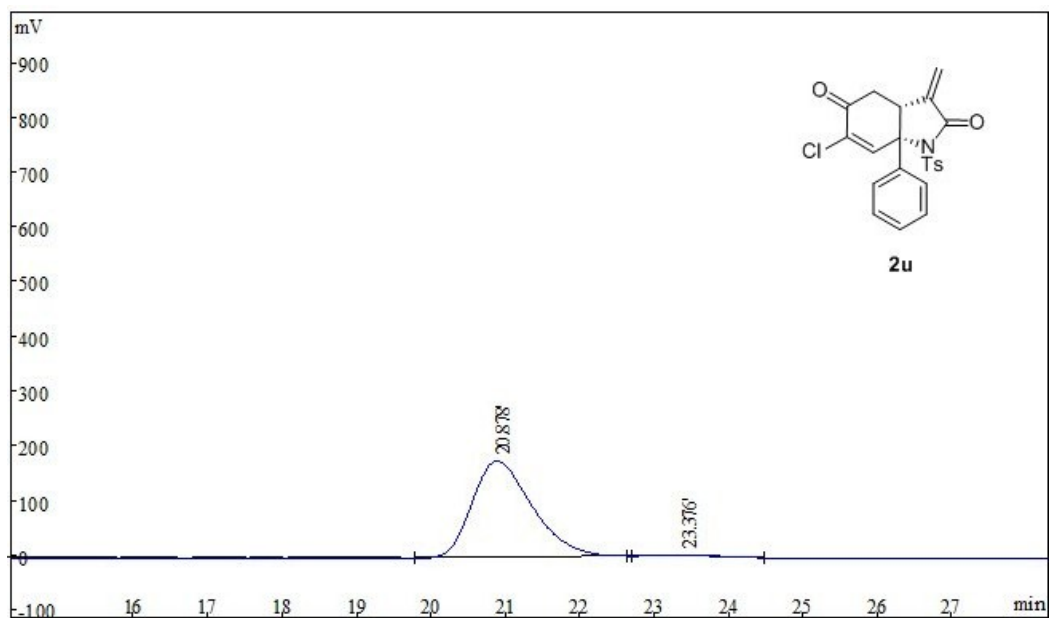

| Rank  | Time(min) | Area% | Area     |
|-------|-----------|-------|----------|
| 1     | 20.878    | 98.11 | 9963502  |
| 2     | 23.376    | 1.888 | 191771   |
| Total |           | 100   | 10155273 |

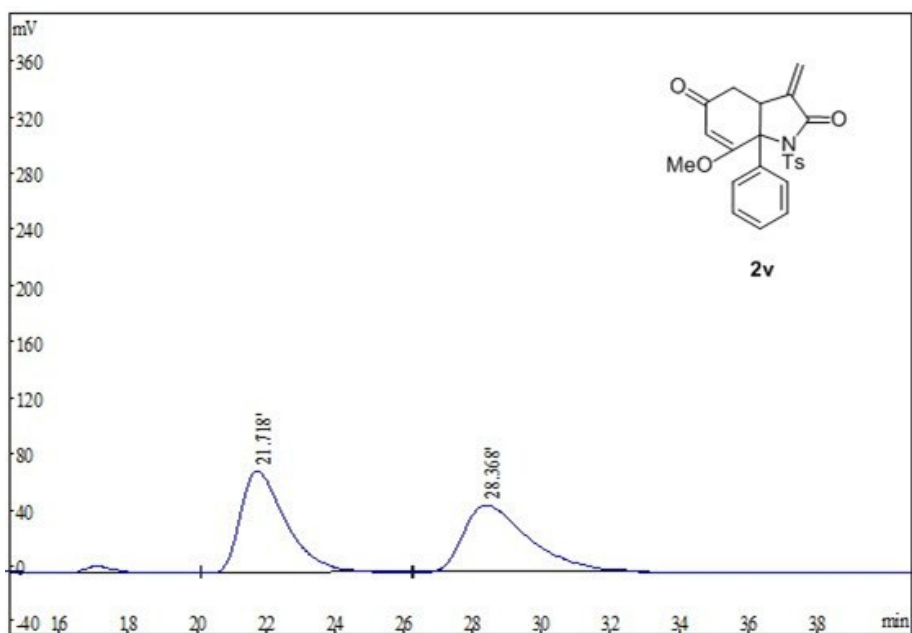

| Rank  | Time(min) | Area% | Area     |
|-------|-----------|-------|----------|
| 1     | 21.718    | 49.87 | 6759183  |
| 2     | 28.368    | 50.13 | 6794099  |
| Total |           | 100   | 13553282 |

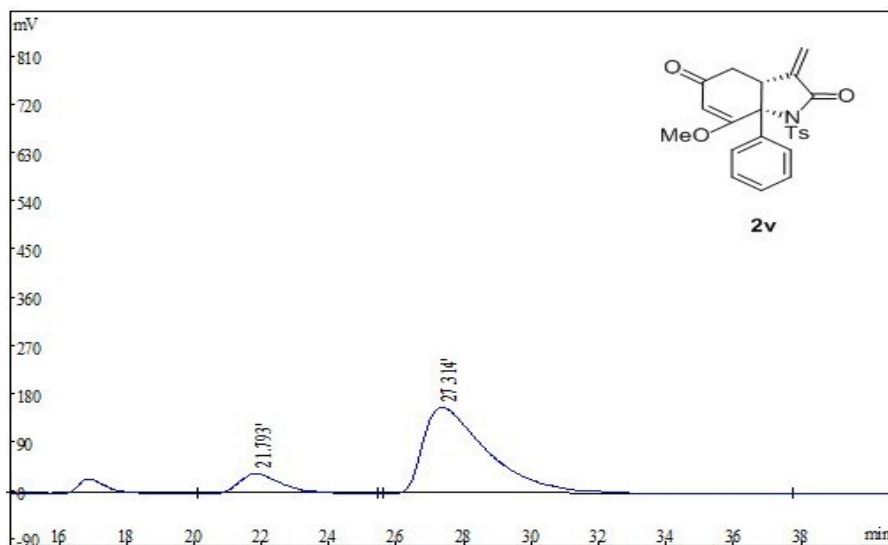

| Rank  | Time(min) | Area% | Area     |
|-------|-----------|-------|----------|
| 1     | 21.793    | 13.43 | 3393466  |
| 2     | 27.314    | 86.57 | 21872883 |
| Total |           | 100   | 25266349 |

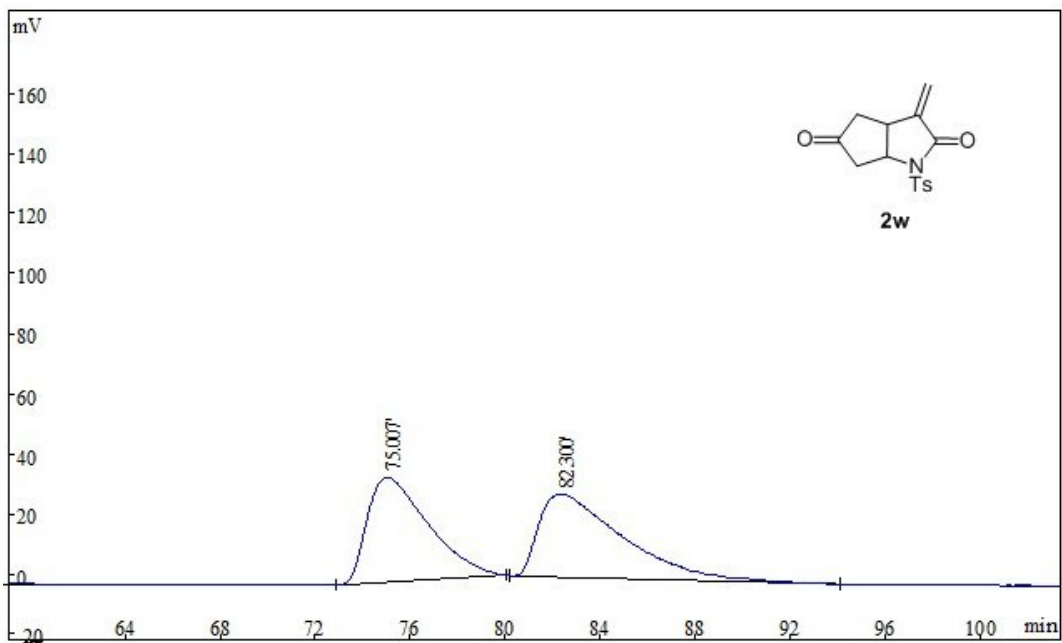

| Rank  | Time(min) | Area% | Area     |
|-------|-----------|-------|----------|
| 1     | 75.007    | 48.03 | 6345513  |
| 2     | 82.300    | 51.97 | 6865154  |
| Total |           | 100   | 13210667 |

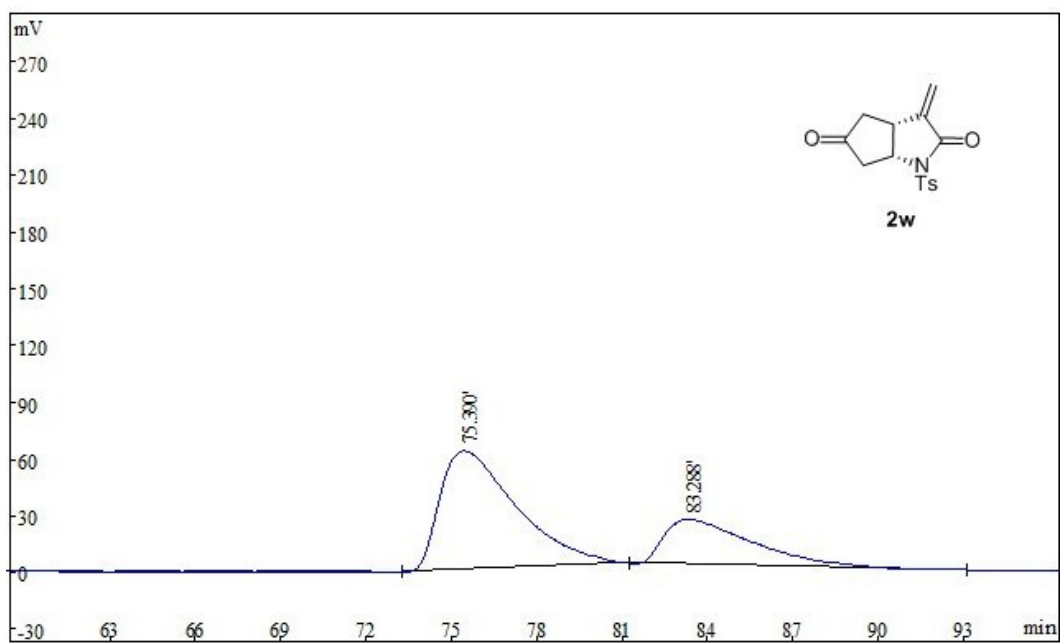

| Rank  | Time(min) | Area% | Area     |
|-------|-----------|-------|----------|
| 1     | 75.390    | 69.17 | 11821162 |
| 2     | 83.288    | 30.83 | 5269055  |
| Total |           | 100   | 17090217 |

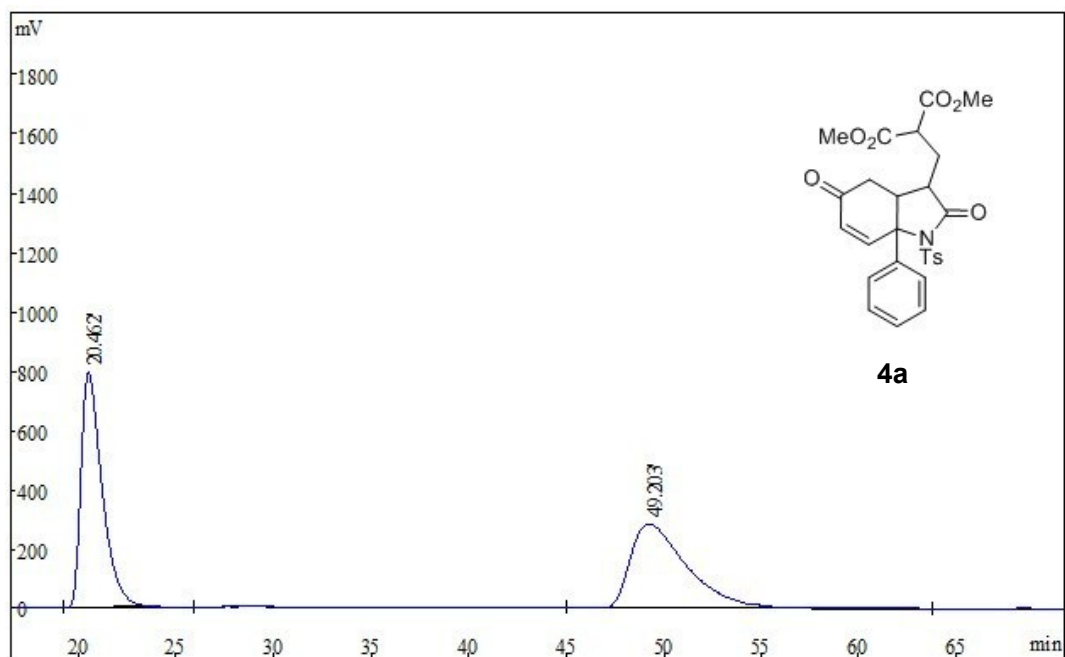

| Rank  | Time(min) | Area% | Area      |
|-------|-----------|-------|-----------|
| 1     | 20.462    | 50.34 | 60795776  |
| 2     | 49.203    | 49.66 | 59964525  |
| Total |           | 100   | 120760301 |

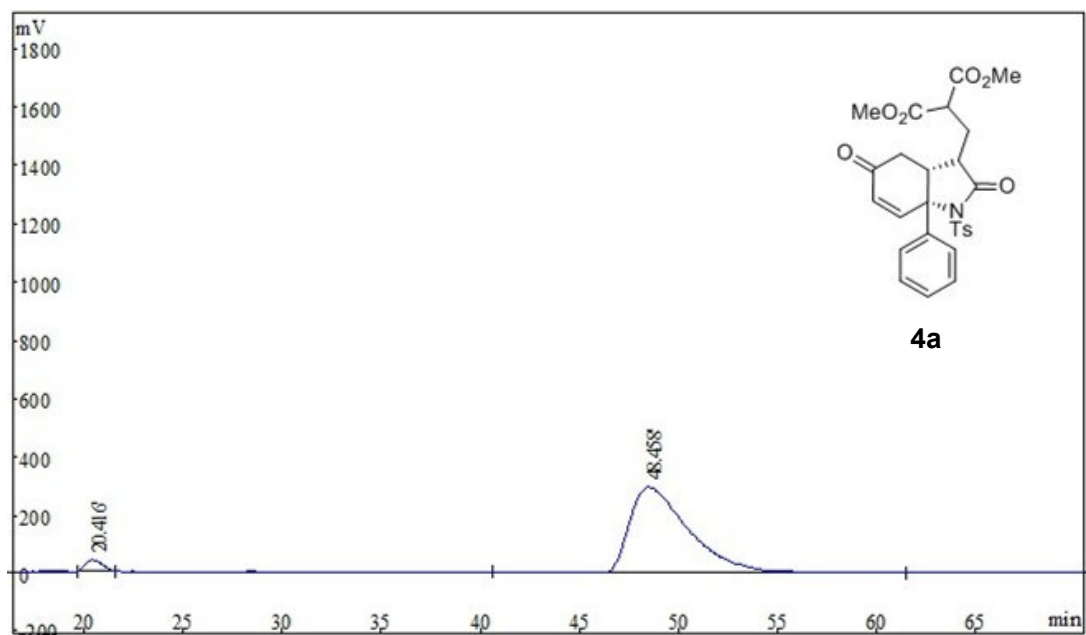

| Rank  | Time(min) | Area% | Area     |
|-------|-----------|-------|----------|
| 1     | 20.416    | 3.52  | 2284864  |
| 2     | 48.458    | 96.48 | 62603430 |
| Total |           | 100   | 64888294 |



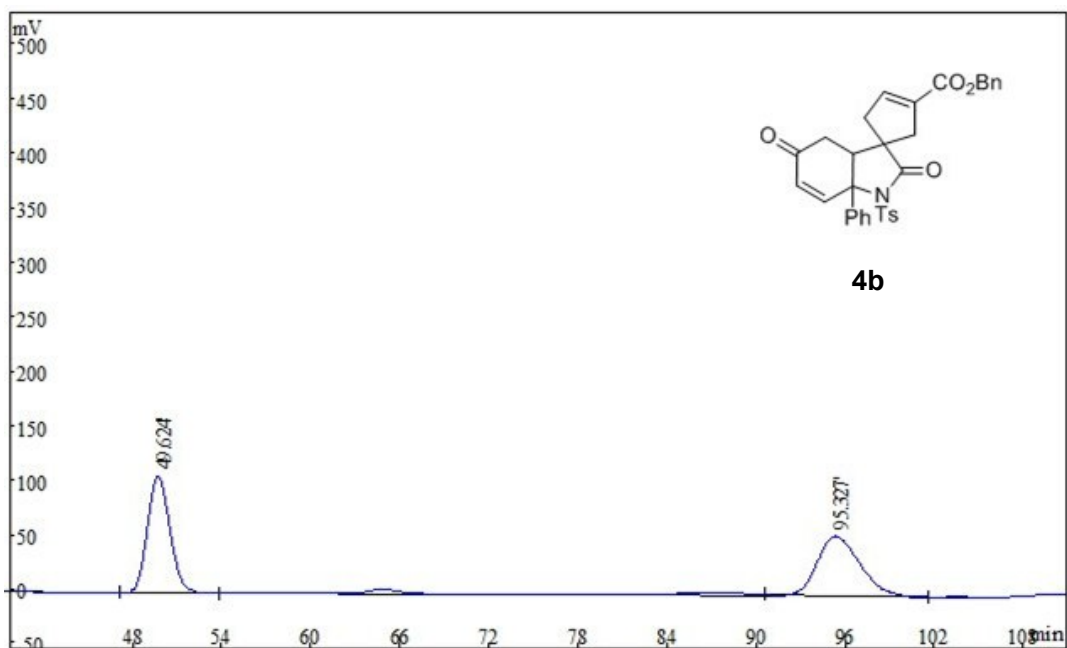

| Rank  | Time(min) | Area% | Area     |
|-------|-----------|-------|----------|
| 1     | 49.624    | 50.86 | 11521064 |
| 2     | 95.327    | 49.14 | 11131507 |
| Total |           | 100   | 22652571 |

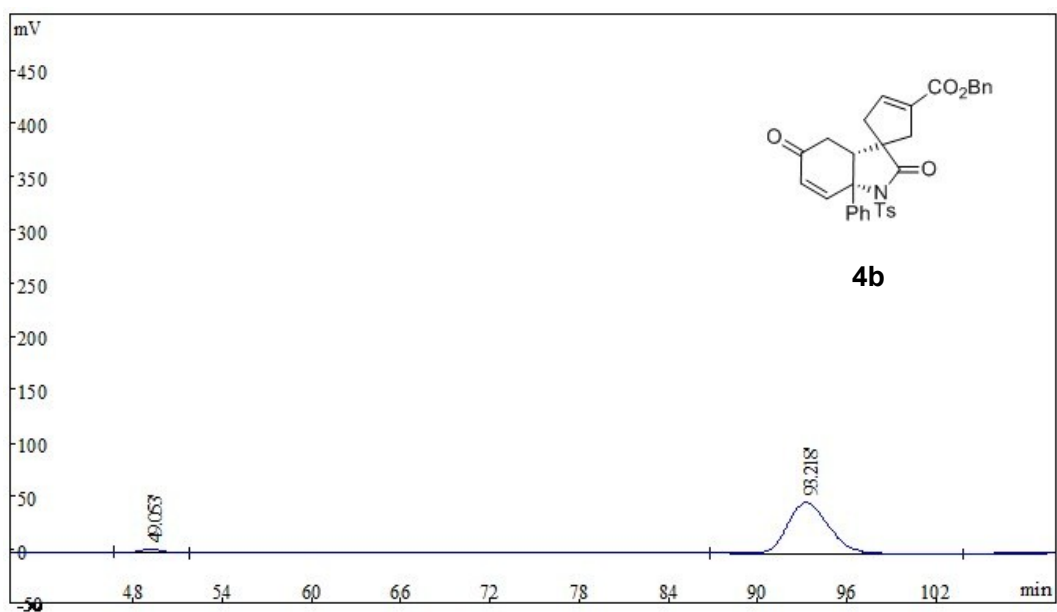

| Rank  | Time(min) | Area% | Area     |
|-------|-----------|-------|----------|
| 1     | 49.053    | 3.104 | 310872   |
| 2     | 93.218    | 96.89 | 9703847  |
| Total |           | 100   | 10014719 |

## VI. X-ray crystal structure

Crystallographic data for compound **1e** (CCDC-1524099)\* has been deposited with the Cambridge Crystallographic Data Centre, Copies of the data can be obtained, free of charge, on application to CCDC (Email:deposit@ccdc.cam.ac.uk).

\* A tool (PLATON SQUEEZE) for the calculation of the disordered solvent contribution to the calculated structure factors was used, see: L. S. Anthony, *Acta Cryst.* **2015**, C71, 9-18.

Crystallographic data for compound **2b** (CCDC-1524100) has been deposited with the Cambridge Crystallographic Data Centre, Copies of the data can be obtained, free of charge, on application to CCDC (Email:deposit@ccdc.cam.ac.uk).

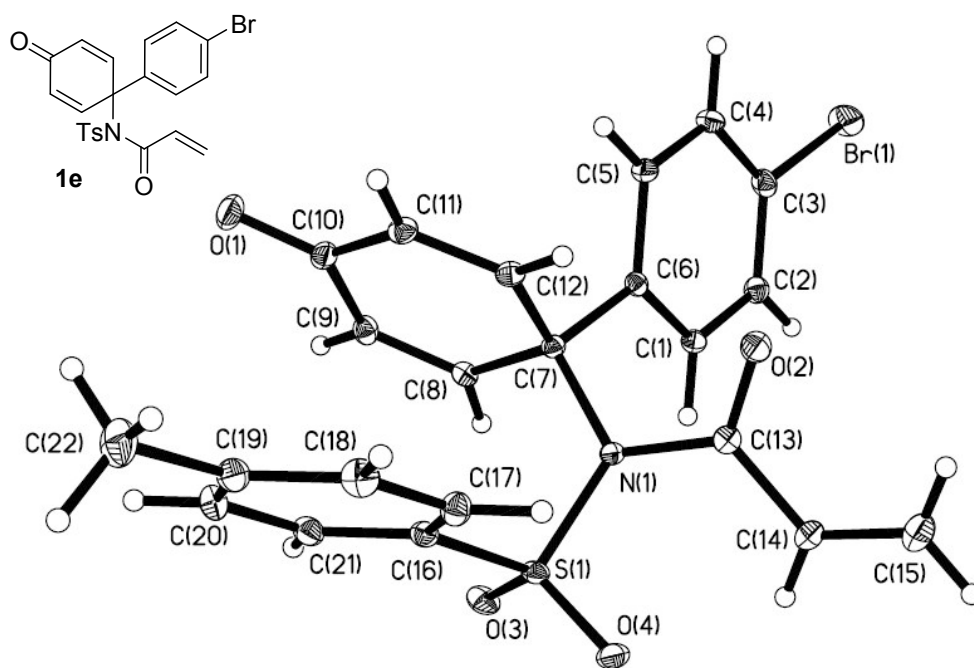

Figure S1: X-ray structure of **1e** (The H-atoms are omitted for clarity) CCDC NO.1524099

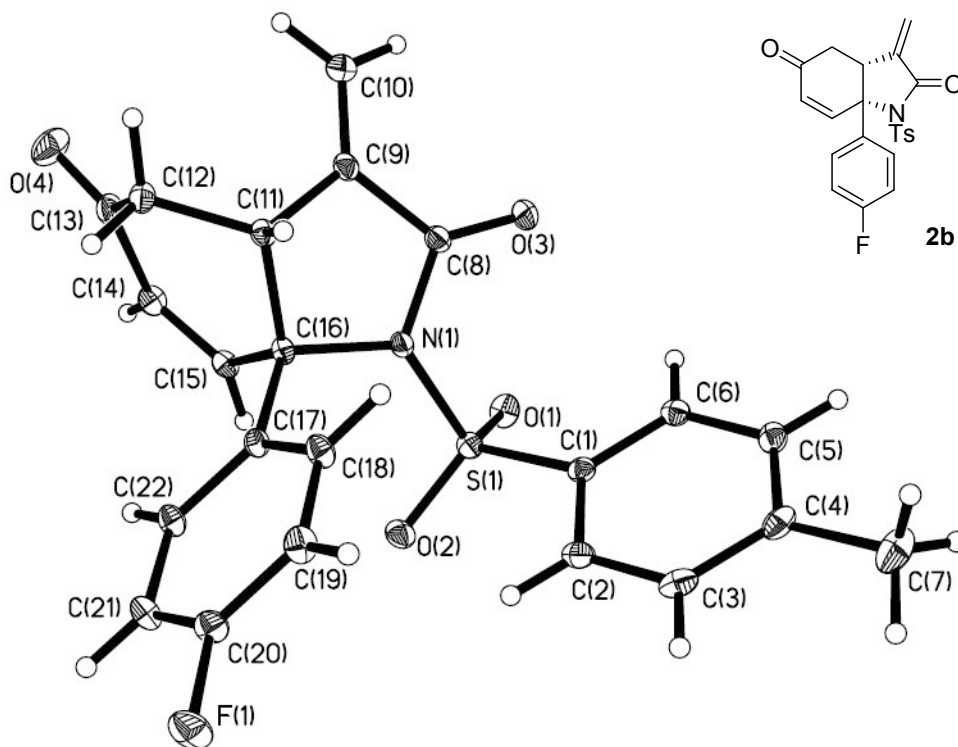

Figure S2: X-ray structure of **2b** (The H-atoms are omitted for clarity) CCDC NO. 1524100
